# Supplementary material for: Single-cell ‘omic profiles of human aortic endothelial cells in vitro and human atherosclerotic lesions ex vivo reveal heterogeneity of endothelial subtype and response to activating perturbations
Source: PubMed Central journal article supplement (PMC10997331; doi:10.7554/elife.91729), 2024-04-05

No Treatment

IL1B-treated

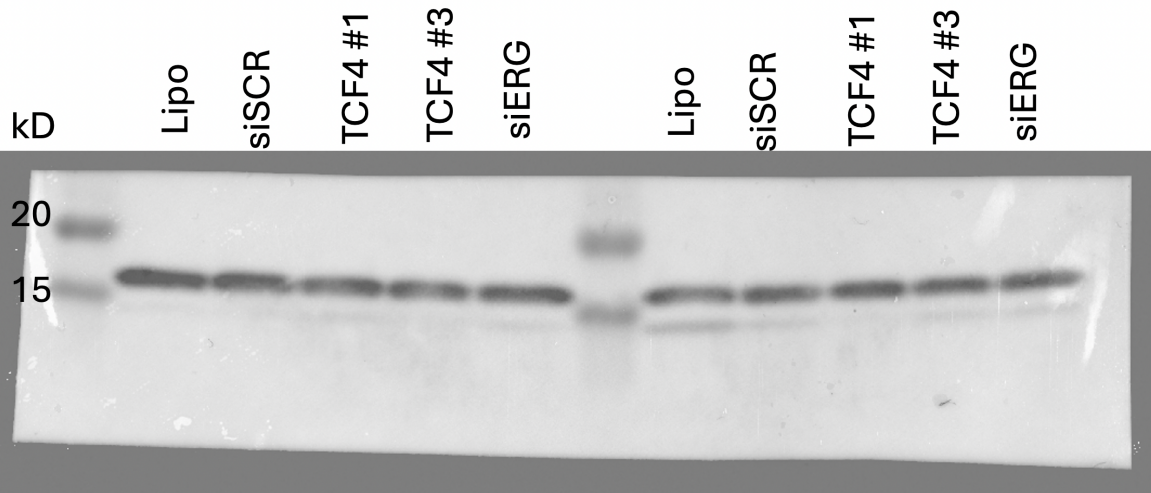

Supplement: elife-91729-fig3-data3.pdf [file elife-91729-fig3-data3.pdf]
