# Supplementary material for: Single-cell ‘omic profiles of human aortic endothelial cells in vitro and human atherosclerotic lesions ex vivo reveal heterogeneity of endothelial subtype and response to activating perturbations
Source: eLife journal article supplement (doi:10.7554/elife.91729), 2023-12-04

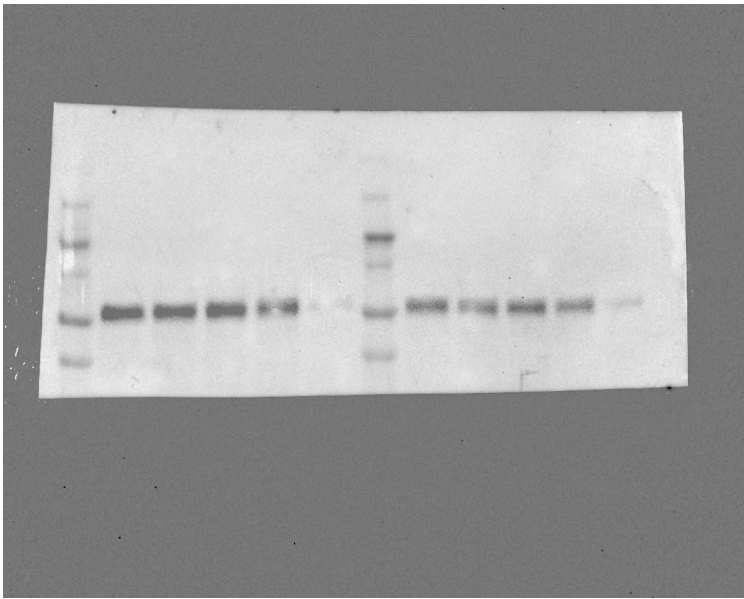

Supplement: fig3-data4 [file elife-91729-fig3-data4-v1.pdf]
