# Supplementary material for: Single-cell ‘omic profiles of human aortic endothelial cells in vitro and human atherosclerotic lesions ex vivo reveal heterogeneity of endothelial subtype and response to activating perturbations
Source: eLife. 2024 Apr 5;12:RP91729. doi: 10.7554/eLife.91729 (PMC10997331; doi:10.7554/eLife.91729)
Supplement: Supplementary file 1. — (a) The numbers of total reads and reads per nucleus in snRNA-seq and snATAC-seq data: total reads and reads per nucleus in snRNA-seq and snATAC-seq data are shown. (b) Cells and transcripts detected per nucleus for each snRNA-seq library after filtering during quality control. (c) Proportion of cells belonging to each donor for each EC cluster. (d) Markers for each cluster: discovered using Seurat’s FindAllMarkers function with latent.vars set to ‘Treatment’. Each gene is tested for differential expression between cells of each cluster and the cells outside of that cluster. p_val corresponds to the p-value of the Wilcoxon rank sum test, avg_log2FC is the log2-fold change in expression of the marker for the average cell in the cluster. Subtype is the designated subtype chosen for each cluster, cluster is the cluster of cells for which the marker was discovered, gene is the markers, pct.1 is the percentage of cells expressing the marker within the tested cluster, pct.2 is the percentage of cells expressing the marker outside the cluster, and p_val_adj is the Bonferroni adjusted p-value (based on the number of genes tested). (e) Top biological pathways from Metascape pathway enrichment analysis (and corresponding p-values) taken from top 100 significant genes for each cluster from FindAllMarkers. (f) Cells and peaks detected per nucleus for each snATAC-seq library after filtering during quality control. (g) List of chemical and genetic perturbations that each primary cell donor underwent: TGFB2=7-day TGFB2 (10 ng/ml); IL1B=7-day IL1B (10 ng/ml); IL1B6h=6 hr IL1B (1 ng/ml); siERG = siRNA-mediated knock-down of ERG (siERG), achieved with serial transfections on days 0 and 4. Ancestries were determined according to 1000 Genomes Project superpopulations. (h) Differential accessible regions (p<0.005) across EC subtypes. (i) Differentially expressed genes (DEGs) with TGFB2, IL1B, or siERG induction across EC subtypes: briefly, pseudobulk DEG analysis is performed to find ge [file elife-91729-supp1.xlsx]

## Sheet: Supplementary File 1a
Lane	Cells	Total RNA reads	RNA reads per nucleus	Total ATAC reads	ATAC reads per nucleus
1	6582	195694526	29731.8	150984093	22938.9
2	5036	224766470	44631.9	247232051	49092.9
3	5152	194980961	37845.7	224670384	43608.4
4	4810	186628867	38800.2	155210577	32268.3
5	4666	159042922	34085.5	210085152	45024.7
6	3249	274462681	84476.1	409769696	126122
7	5706	323365758	56671.2	409142643	71703.9

## Sheet: Supplementary File 1b
Lane	Cells	Transcripts detected per nucleus
1	4175	2644
2	3516	3433
3	2926	2481
4	2368	2691
5	2658	2672
6	1074	3938
7	2232	3893

## Sheet: Supplementary File 1c
Donor	Cluster	Proportion
5	EC5	0.996772
6	EC1	0.634699
5	EC1	0.180471
3	EC4	0.358834
3	EC3	0.335764
6	EC2	0.631786
5	EC3	0.174154
3	EC1	0.177855
5	EC2	0.154209
3	EC2	0.188041
6	EC3	0.255251
5	EC4	0.234062
2	EC3	0.0720537
2	EC4	0.0919854
4	EC3	0.137398
2	EC2	0.00944138
4	EC2	0.0165224
4	EC1	0.0043592
1	EC4	0.311475
1	EC3	0.0253792
1	EC1	0.00087184
4	EC4	0.00364299
2	EC1	0.00174368
2	EC5	0.00129116
6	EC5	0.00129116
4	EC5	0.000645578

## Sheet: Supplementary File 1d
gene	p_val	avg_log2FC	pct.1	pct.2	p_val_adj	cluster	subtype
COL8A1	0	0.591641	0.821	0.613	0	EC3	Activated mesenchymal-like
AC013652.1	0	0.563798	0.806	0.509	0	EC3	Activated mesenchymal-like
ENOX1	0	0.497474	0.68	0.377	0	EC3	Activated mesenchymal-like
TXNDC5	0	0.315375	0.935	0.785	0	EC3	Activated mesenchymal-like
ITGAV	0	0.287484	0.945	0.847	0	EC3	Activated mesenchymal-like
ADAMTSL1	0	-0.546016	0.221	0.498	0	EC3	Activated mesenchymal-like
LINC02742	0	0.715155	0.912	0.522	0	EC2	Proliferative
ST6GALNAC3	0	0.667442	0.843	0.478	0	EC2	Proliferative
MIR924HG	0	0.664576	0.438	0.071	0	EC2	Proliferative
INSYN2B	0	0.655019	0.75	0.285	0	EC2	Proliferative
ADAMTS9	0	0.62943	0.673	0.32	0	EC2	Proliferative
ASPM	0	0.628637	0.472	0.112	0	EC2	Proliferative
NLGN1	0	0.619459	0.986	0.711	0	EC2	Proliferative
PLCL1	0	0.618982	0.919	0.638	0	EC2	Proliferative
HMGA2	0	0.598723	0.849	0.511	0	EC2	Proliferative
NRCAM	0	0.593183	0.919	0.608	0	EC2	Proliferative
CEP128	0	0.585948	0.509	0.163	0	EC2	Proliferative
CENPE	0	0.580515	0.461	0.135	0	EC2	Proliferative
CENPF	0	0.544932	0.505	0.151	0	EC2	Proliferative
IL1RL1	0	0.54461	0.637	0.255	0	EC2	Proliferative
FRMD5	0	0.512224	0.972	0.716	0	EC2	Proliferative
ANLN	0	0.510877	0.453	0.12	0	EC2	Proliferative
ARHGAP11B	0	0.50755	0.424	0.097	0	EC2	Proliferative
TOP2A	0	0.506167	0.427	0.107	0	EC2	Proliferative
MKI67	0	0.503358	0.468	0.114	0	EC2	Proliferative
MELK	0	0.489099	0.454	0.106	0	EC2	Proliferative
LINC01572	0	0.484992	0.517	0.201	0	EC2	Proliferative
KIF20B	0	0.480194	0.456	0.126	0	EC2	Proliferative
TNIK	0	0.47715	0.948	0.733	0	EC2	Proliferative
KNL1	0	0.476731	0.41	0.084	0	EC2	Proliferative
POLQ	0	0.472303	0.393	0.056	0	EC2	Proliferative
GRB14	0	0.471406	0.518	0.183	0	EC2	Proliferative
PDE10A	0	0.453857	0.904	0.635	0	EC2	Proliferative
BRIP1	0	0.453341	0.404	0.112	0	EC2	Proliferative
CIT	0	0.450223	0.376	0.076	0	EC2	Proliferative
PLXNA2	0	0.447478	0.951	0.698	0	EC2	Proliferative
CENPK	0	0.445559	0.45	0.115	0	EC2	Proliferative
MCAM	0	0.443177	0.839	0.508	0	EC2	Proliferative
ARHGAP24	0	0.422149	0.956	0.801	0	EC2	Proliferative
RASA2	0	0.419686	0.936	0.723	0	EC2	Proliferative
PRKAR2B	0	0.419171	0.51	0.163	0	EC2	Proliferative
NCAPG	0	0.415461	0.361	0.065	0	EC2	Proliferative
KIF18B	0	0.41166	0.323	0.038	0	EC2	Proliferative
ADK	0	0.408852	0.967	0.821	0	EC2	Proliferative
HHIP	0	0.40024	0.99	0.864	0	EC2	Proliferative
KIF11	0	0.395387	0.36	0.078	0	EC2	Proliferative
KIF4A	0	0.393801	0.347	0.073	0	EC2	Proliferative
NUSAP1	0	0.388462	0.35	0.071	0	EC2	Proliferative
BRCA2	0	0.385846	0.373	0.093	0	EC2	Proliferative
NCAPG2	0	0.383671	0.379	0.092	0	EC2	Proliferative
KIF18A	0	0.37295	0.318	0.07	0	EC2	Proliferative
PRR11	0	0.372273	0.387	0.105	0	EC2	Proliferative
CENPI	0	0.372163	0.347	0.063	0	EC2	Proliferative
STIL	0	0.36257	0.36	0.089	0	EC2	Proliferative
BUB1B	0	0.361271	0.307	0.041	0	EC2	Proliferative
GTSE1	0	0.360105	0.322	0.056	0	EC2	Proliferative
FANCI	0	0.353506	0.381	0.105	0	EC2	Proliferative
NUF2	0	0.35234	0.323	0.064	0	EC2	Proliferative
VEPH1	0	0.351322	0.973	0.847	0	EC2	Proliferative
CIP2A	0	0.350671	0.38	0.104	0	EC2	Proliferative
CDCA2	0	0.344297	0.286	0.045	0	EC2	Proliferative
SMURF2	0	0.343175	0.976	0.873	0	EC2	Proliferative
DLGAP5	0	0.336496	0.316	0.059	0	EC2	Proliferative
NDC80	0	0.333659	0.287	0.044	0	EC2	Proliferative
LMNB1	0	0.327443	0.357	0.092	0	EC2	Proliferative
CLSPN	0	0.323719	0.311	0.063	0	EC2	Proliferative
BUB1	0	0.31629	0.291	0.05	0	EC2	Proliferative
DEPDC1B	0	0.316226	0.263	0.034	0	EC2	Proliferative
SPOCK1	0	0.314959	0.991	0.878	0	EC2	Proliferative
Z94721.1	0	0.313689	0.304	0.057	0	EC2	Proliferative
FANCA	0	0.312112	0.337	0.076	0	EC2	Proliferative
ARHGAP11A	0	0.31056	0.306	0.061	0	EC2	Proliferative
KIF15	0	0.302812	0.281	0.041	0	EC2	Proliferative
CEP55	0	0.28953	0.287	0.056	0	EC2	Proliferative
NEAT1	0	-0.301586	0.983	0.991	0	EC2	Proliferative
GLIS3	0	-0.703243	0.312	0.656	0	EC2	Proliferative
ANO2	0	0.857613	0.7	0.215	0	EC1	Angiogenic
NRP2	0	0.827111	0.684	0.266	0	EC1	Angiogenic
KDR	0	0.817898	0.768	0.319	0	EC1	Angiogenic
VWF	0	0.817593	0.774	0.303	0	EC1	Angiogenic
DYSF	0	0.801894	0.789	0.334	0	EC1	Angiogenic
TSPAN18	0	0.792575	0.614	0.131	0	EC1	Angiogenic
PPP1R16B	0	0.790278	0.738	0.25	0	EC1	Angiogenic
THSD7A	0	0.742379	0.764	0.346	0	EC1	Angiogenic
AFAP1L1	0	0.731051	0.663	0.247	0	EC1	Angiogenic
CALCRL	0	0.669889	0.944	0.652	0	EC1	Angiogenic
PECAM1	0	0.653635	0.944	0.663	0	EC1	Angiogenic
ZNF521	0	0.637487	0.973	0.682	0	EC1	Angiogenic
ARRB1	0	0.579723	0.595	0.235	0	EC1	Angiogenic
ELMO1	0	0.570058	0.939	0.654	0	EC1	Angiogenic
MAML3	0	0.567571	0.88	0.629	0	EC1	Angiogenic
RASGRP3	0	0.533366	0.392	0.096	0	EC1	Angiogenic
CD34	0	0.513356	0.378	0.079	0	EC1	Angiogenic
LAMA4	0	0.496336	0.958	0.781	0	EC1	Angiogenic
VASH1	0	0.487128	0.368	0.084	0	EC1	Angiogenic
PTPRM	0	0.486852	0.972	0.871	0	EC1	Angiogenic
TACC1	0	0.471541	0.873	0.696	0	EC1	Angiogenic
PALD1	0	0.400311	0.262	0.025	0	EC1	Angiogenic
UTRN	0	0.390895	0.993	0.952	0	EC1	Angiogenic
WSB1	0	0.374176	0.966	0.903	0	EC1	Angiogenic
RBMS3	0	-0.313209	0.92	0.979	0	EC1	Angiogenic
FN1	0	-0.374351	0.985	0.996	0	EC1	Angiogenic
NEK7	0	-0.518246	0.618	0.882	0	EC1	Angiogenic
SERPINE1	0	-0.520339	0.735	0.962	0	EC1	Angiogenic
PLOD2	0	-0.589609	0.645	0.9	0	EC1	Angiogenic
MIR31HG	0	-0.648911	0.463	0.795	0	EC1	Angiogenic
SPOCK1	0	-0.652122	0.636	0.946	0	EC1	Angiogenic
NEGR1	0	-0.7444	0.223	0.687	0	EC1	Angiogenic
BICC1	0	-0.759944	0.239	0.651	0	EC1	Angiogenic
ATP13A3	0	-0.784536	0.463	0.868	0	EC1	Angiogenic
SEMA3C	0	-0.824542	0.112	0.572	0	EC1	Angiogenic
MIR100HG	0	-0.864316	0.433	0.865	0	EC1	Angiogenic
SEMA5A	0	-0.869622	0.078	0.52	0	EC1	Angiogenic
NRG1	0	-0.878348	0.321	0.715	0	EC1	Angiogenic
IGFBP3	0	0.908682	0.741	0.323	0	EC5	Procoagulatory
LAMA2	0	0.865484	0.695	0.174	0	EC5	Procoagulatory
COL3A1	0	0.814724	0.819	0.375	0	EC5	Procoagulatory
ABCA9	0	0.81396	0.784	0.312	0	EC5	Procoagulatory
PCDH7	0	0.804962	0.647	0.203	0	EC5	Procoagulatory
ABCA6	0	0.800223	0.795	0.33	0	EC5	Procoagulatory
EDIL3	0	0.762087	0.806	0.372	0	EC5	Procoagulatory
TRPS1	0	0.717746	0.847	0.447	0	EC5	Procoagulatory
UNC5C	0	0.702272	0.429	0.017	0	EC5	Procoagulatory
ARHGAP6	0	0.676477	0.492	0.144	0	EC5	Procoagulatory
SULT1E1	0	0.626792	0.42	0.102	0	EC5	Procoagulatory
AL359636.2	0	0.616779	0.411	0.048	0	EC5	Procoagulatory
FAM155A	0	0.605233	0.987	0.729	0	EC5	Procoagulatory
LINC01320	0	0.557084	0.386	0.049	0	EC5	Procoagulatory
MIR100HG	0	0.554243	0.969	0.779	0	EC5	Procoagulatory
LRRC17	0	0.534035	0.407	0.069	0	EC5	Procoagulatory
CDH11	0	0.529819	0.929	0.755	0	EC5	Procoagulatory
TTTY10	0	0.519144	0.34	0.062	0	EC5	Procoagulatory
PDE3A	0	0.507866	0.987	0.86	0	EC5	Procoagulatory
PDE1A	0	0.496794	0.292	0.031	0	EC5	Procoagulatory
PRDM6	0	0.486826	0.348	0.046	0	EC5	Procoagulatory
SUCNR1	0	0.358334	0.228	0.013	0	EC5	Procoagulatory
IGF2BP2	0	-0.838619	0.266	0.833	0	EC5	Procoagulatory
NLGN1	0	-0.918983	0.404	0.812	0	EC5	Procoagulatory
ST6GALNAC3	0	-0.968081	0.07	0.612	0	EC5	Procoagulatory
EFNA5	0	-1.07561	0.031	0.677	0	EC5	Procoagulatory
COL1A1	0	1.92882	0.992	0.285	0	EC4	Mesenchymal
COL6A3	0	1.63472	0.926	0.071	0	EC4	Mesenchymal
COL1A2	0	1.50175	0.994	0.515	0	EC4	Mesenchymal
GRIK2	0	1.39307	0.839	0.013	0	EC4	Mesenchymal
COL6A2	0	1.33641	0.912	0.094	0	EC4	Mesenchymal
TIMP3	0	1.33326	0.742	0.048	0	EC4	Mesenchymal
KCNQ5	0	1.32864	0.866	0.145	0	EC4	Mesenchymal
COL3A1	0	1.31414	0.973	0.361	0	EC4	Mesenchymal
GPC6	0	1.28623	0.749	0.011	0	EC4	Mesenchymal
THBS2	0	1.19502	0.907	0.125	0	EC4	Mesenchymal
DSP	0	1.17026	0.77	0.036	0	EC4	Mesenchymal
ADAMTS2	0	1.14431	0.804	0.014	0	EC4	Mesenchymal
MEG8	0	1.14395	0.912	0.193	0	EC4	Mesenchymal
TGFBI	0	1.12265	0.933	0.456	0	EC4	Mesenchymal
COL6A1	0	1.11922	0.846	0.129	0	EC4	Mesenchymal
LOX	0	1.05502	0.909	0.323	0	EC4	Mesenchymal
MEG3	0	1.04586	0.892	0.195	0	EC4	Mesenchymal
XYLT1	0	1.04322	0.757	0.123	0	EC4	Mesenchymal
VCAN	0	1.0418	0.964	0.377	0	EC4	Mesenchymal
SDC2	0	1.03063	0.779	0.042	0	EC4	Mesenchymal
ITGA11	0	1.02561	0.658	0.055	0	EC4	Mesenchymal
AUTS2	0	1.02253	0.731	0.087	0	EC4	Mesenchymal
POSTN	0	1.00231	0.839	0.453	0	EC4	Mesenchymal
INHBA	0	0.967395	0.872	0.381	0	EC4	Mesenchymal
PAPPA	0	0.967112	0.863	0.303	0	EC4	Mesenchymal
FBLN2	0	0.929979	0.758	0.066	0	EC4	Mesenchymal
PID1	0	0.905844	0.706	0.081	0	EC4	Mesenchymal
TIMP1	0	0.904476	0.901	0.496	0	EC4	Mesenchymal
EBF1	0	0.878967	0.712	0.092	0	EC4	Mesenchymal
MSC-AS1	0	0.864761	0.785	0.174	0	EC4	Mesenchymal
LMO7	0	0.86166	0.791	0.318	0	EC4	Mesenchymal
STC2	0	0.854762	0.817	0.285	0	EC4	Mesenchymal
PRR16	0	0.853545	0.572	0.032	0	EC4	Mesenchymal
CARMN	0	0.850374	0.574	0.019	0	EC4	Mesenchymal
COL5A1	0	0.849187	0.975	0.608	0	EC4	Mesenchymal
NGF	0	0.848788	0.565	0.012	0	EC4	Mesenchymal
CCDC80	0	0.842302	0.783	0.225	0	EC4	Mesenchymal
ALDH1L2	0	0.835104	0.707	0.06	0	EC4	Mesenchymal
TEX41	0	0.804823	0.491	0.019	0	EC4	Mesenchymal
FAT1	0	0.802556	0.848	0.245	0	EC4	Mesenchymal
ITGA1	0	0.795629	0.665	0.179	0	EC4	Mesenchymal
NREP	0	0.794139	0.789	0.414	0	EC4	Mesenchymal
FAP	0	0.786879	0.732	0.176	0	EC4	Mesenchymal
FMN2	0	0.775867	0.535	0.012	0	EC4	Mesenchymal
LRP1	0	0.774568	0.691	0.071	0	EC4	Mesenchymal
UST	0	0.760314	0.741	0.206	0	EC4	Mesenchymal
FBN1	0	0.759836	0.991	0.713	0	EC4	Mesenchymal
ROBO2	0	0.759752	0.352	0.015	0	EC4	Mesenchymal
SLC8A1	0	0.755454	0.589	0.099	0	EC4	Mesenchymal
AP002989.1	0	0.746826	0.646	0.243	0	EC4	Mesenchymal
WNT5B	0	0.731542	0.508	0.012	0	EC4	Mesenchymal
PAPPA2	0	0.731526	0.513	0.041	0	EC4	Mesenchymal
LINC00511	0	0.716803	0.484	0.017	0	EC4	Mesenchymal
SERPINH1	0	0.695106	0.888	0.458	0	EC4	Mesenchymal
ROR1	0	0.692082	0.704	0.255	0	EC4	Mesenchymal
MEGF6	0	0.690132	0.657	0.167	0	EC4	Mesenchymal
GLI2	0	0.689855	0.665	0.127	0	EC4	Mesenchymal
SPARC	0	0.688106	0.998	0.884	0	EC4	Mesenchymal
MYL9	0	0.687267	0.753	0.292	0	EC4	Mesenchymal
LINC01060	0	0.685876	0.322	0.003	0	EC4	Mesenchymal
TRPC4	0	0.681464	0.49	0.067	0	EC4	Mesenchymal
AC010343.3	0	0.674484	0.454	0.051	0	EC4	Mesenchymal
TPM2	0	0.672699	0.871	0.488	0	EC4	Mesenchymal
AL591043.2	0	0.670326	0.527	0.088	0	EC4	Mesenchymal
MYOCD	0	0.668032	0.461	0.01	0	EC4	Mesenchymal
LINC01592	0	0.660379	0.505	0.059	0	EC4	Mesenchymal
ATP10A	0	0.658566	0.474	0.01	0	EC4	Mesenchymal
KCTD8	0	0.642667	0.38	0.01	0	EC4	Mesenchymal
UNC5B	0	0.638002	0.597	0.101	0	EC4	Mesenchymal
ADAMTS12	0	0.63171	0.424	0.014	0	EC4	Mesenchymal
TAGLN	0	0.628056	0.893	0.55	0	EC4	Mesenchymal
ISLR	0	0.62677	0.474	0.014	0	EC4	Mesenchymal
CYP1B1	0	0.626442	0.467	0.076	0	EC4	Mesenchymal
COL12A1	0	0.623265	0.596	0.117	0	EC4	Mesenchymal
ITGA3	0	0.620394	0.733	0.276	0	EC4	Mesenchymal
C5orf46	0	0.615	0.469	0.052	0	EC4	Mesenchymal
PRRX1	0	0.605759	0.638	0.169	0	EC4	Mesenchymal
CREB3L1	0	0.601037	0.558	0.056	0	EC4	Mesenchymal
MFAP5	0	0.595223	0.48	0.041	0	EC4	Mesenchymal
GREM1	0	0.594004	0.37	0.01	0	EC4	Mesenchymal
SLC7A5	0	0.59383	0.62	0.155	0	EC4	Mesenchymal
THY1	0	0.58972	0.461	0.01	0	EC4	Mesenchymal
BMP1	0	0.584723	0.655	0.188	0	EC4	Mesenchymal
LOXL1	0	0.583584	0.503	0.042	0	EC4	Mesenchymal
HAS2	0	0.581747	0.382	0.066	0	EC4	Mesenchymal
NHS	0	0.569749	0.574	0.16	0	EC4	Mesenchymal
DIP2C	0	0.566031	0.658	0.216	0	EC4	Mesenchymal
COL4A1	0	0.560379	0.965	0.738	0	EC4	Mesenchymal
COL5A3	0	0.552098	0.397	0.01	0	EC4	Mesenchymal
NOTCH3	0	0.545796	0.463	0.014	0	EC4	Mesenchymal
KIRREL3	0	0.544118	0.399	0.038	0	EC4	Mesenchymal
PI16	0	0.535172	0.363	0.064	0	EC4	Mesenchymal
KCND2	0	0.514951	0.318	0.017	0	EC4	Mesenchymal
FSTL1	0	0.512631	0.965	0.763	0	EC4	Mesenchymal
AEBP1	0	0.509376	0.542	0.135	0	EC4	Mesenchymal
EPHA5	0	0.508981	0.341	0.01	0	EC4	Mesenchymal
CKAP4	0	0.507538	0.923	0.636	0	EC4	Mesenchymal
VGLL3	0	0.496766	0.456	0.085	0	EC4	Mesenchymal
ZNF469	0	0.492018	0.45	0.04	0	EC4	Mesenchymal
LINC00670	0	0.485644	0.366	0.005	0	EC4	Mesenchymal
CA12	0	0.471854	0.41	0.055	0	EC4	Mesenchymal
ANK2	0	0.470912	0.378	0.056	0	EC4	Mesenchymal
ABCC9	0	0.46722	0.34	0.003	0	EC4	Mesenchymal
CALU	0	0.466923	0.981	0.822	0	EC4	Mesenchymal
TMEM178B	0	0.462392	0.293	0.006	0	EC4	Mesenchymal
PSAT1	0	0.461984	0.481	0.114	0	EC4	Mesenchymal
PDE1C	0	0.461282	0.289	0.027	0	EC4	Mesenchymal
PARP8	0	0.452776	0.409	0.053	0	EC4	Mesenchymal
CSMD2	0	0.452611	0.374	0.054	0	EC4	Mesenchymal
APBB1IP	0	0.450292	0.341	0.005	0	EC4	Mesenchymal
PDGFRB	0	0.449734	0.366	0.018	0	EC4	Mesenchymal
WNT5A	0	0.44846	0.336	0.008	0	EC4	Mesenchymal
ALPK2	0	0.443401	0.346	0.003	0	EC4	Mesenchymal
PDGFRA	0	0.43434	0.363	0.042	0	EC4	Mesenchymal
VLDLR-AS1	0	0.433934	0.408	0.061	0	EC4	Mesenchymal
SLC1A5	0	0.43126	0.501	0.139	0	EC4	Mesenchymal
LOXL3	0	0.430348	0.367	0.013	0	EC4	Mesenchymal
LPAR1	0	0.418304	0.327	0.015	0	EC4	Mesenchymal
AL356234.2	0	0.412367	0.361	0.056	0	EC4	Mesenchymal
DUXAP8	0	0.401985	0.387	0.075	0	EC4	Mesenchymal
NUPR1	0	0.400928	0.424	0.073	0	EC4	Mesenchymal
GRIA3	0	0.400144	0.322	0.025	0	EC4	Mesenchymal
COL15A1	0	0.399651	0.257	0.006	0	EC4	Mesenchymal
BX322234.1	0	0.394769	0.364	0.038	0	EC4	Mesenchymal
DEPTOR	0	0.390252	0.306	0.01	0	EC4	Mesenchymal
MFGE8	0	0.387298	0.386	0.067	0	EC4	Mesenchymal
PHGDH	0	0.384514	0.378	0.052	0	EC4	Mesenchymal
GPC1	0	0.383631	0.392	0.07	0	EC4	Mesenchymal
PPP4R4	0	0.379218	0.299	0.009	0	EC4	Mesenchymal
NDUFA4L2	0	0.376834	0.3	0.025	0	EC4	Mesenchymal
OXTR	0	0.373438	0.229	0.017	0	EC4	Mesenchymal
CACNA1C	0	0.368106	0.28	0.028	0	EC4	Mesenchymal
KIAA1755	0	0.365596	0.297	0.029	0	EC4	Mesenchymal
C7orf69	0	0.362631	0.274	0.015	0	EC4	Mesenchymal
AC079298.3	0	0.355657	0.208	0.003	0	EC4	Mesenchymal
SGCD	0	0.352448	0.235	0.013	0	EC4	Mesenchymal
AC134312.5	0	0.342057	0.282	0.008	0	EC4	Mesenchymal
FN1	0	0.335765	1	0.994	0	EC4	Mesenchymal
MXRA8	0	0.334112	0.291	0.008	0	EC4	Mesenchymal
GLIS1	0	0.327722	0.281	0.012	0	EC4	Mesenchymal
CXCL12	0	0.319745	0.255	0.027	0	EC4	Mesenchymal
ACTB	0	0.315232	0.997	0.964	0	EC4	Mesenchymal
STAC	0	0.306687	0.225	0.009	0	EC4	Mesenchymal
EPDR1	0	0.304622	0.279	0.021	0	EC4	Mesenchymal
ID4	0	0.302461	0.229	0.006	0	EC4	Mesenchymal
GPR1	0	0.301653	0.251	0.018	0	EC4	Mesenchymal
KCNG1	0	0.298491	0.258	0.015	0	EC4	Mesenchymal
CD248	0	0.293337	0.211	0.003	0	EC4	Mesenchymal
MAP1A	0	0.290987	0.279	0.032	0	EC4	Mesenchymal
EMILIN2	0	0.284037	0.237	0.021	0	EC4	Mesenchymal
TENM2	0	0.283425	0.171	0.008	0	EC4	Mesenchymal
EMILIN1	0	0.273008	0.283	0.038	0	EC4	Mesenchymal
GNG2	0	0.268541	0.209	0.014	0	EC4	Mesenchymal
SLC4A4	0	0.266689	0.212	0.013	0	EC4	Mesenchymal
CHPF	0	0.264197	0.251	0.02	0	EC4	Mesenchymal
PTPN3	0	0.256571	0.251	0.027	0	EC4	Mesenchymal
SYN3	0	0.250516	0.177	0.009	0	EC4	Mesenchymal
MACF1	0	-0.289472	0.968	0.987	0	EC4	Mesenchymal
HSPG2	0	-0.532032	0.897	0.975	0	EC4	Mesenchymal
WWTR1	0	-0.560751	0.755	0.924	0	EC4	Mesenchymal
ZEB1	0	-0.581756	0.831	0.978	0	EC4	Mesenchymal
RALA	0	-0.598495	0.704	0.882	0	EC4	Mesenchymal
CDK17	0	-0.601879	0.733	0.926	0	EC4	Mesenchymal
EFEMP1	0	-0.623773	0.723	0.894	0	EC4	Mesenchymal
RHOJ	0	-0.674881	0.729	0.944	0	EC4	Mesenchymal
ADGRL4	0	-0.695381	0.437	0.794	0	EC4	Mesenchymal
FLI1	0	-0.703124	0.625	0.92	0	EC4	Mesenchymal
TIE1	0	-0.717514	0.099	0.625	0	EC4	Mesenchymal
CDH5	0	-0.722504	0.18	0.672	0	EC4	Mesenchymal
2022-03-03	0	-0.735921	0.505	0.824	0	EC4	Mesenchymal
SH3D19	0	-0.73793	0.489	0.873	0	EC4	Mesenchymal
EDN1	0	-0.742703	0.352	0.745	0	EC4	Mesenchymal
MYO1D	0	-0.748919	0.45	0.859	0	EC4	Mesenchymal
FAM107B	0	-0.767723	0.474	0.855	0	EC4	Mesenchymal
TGFBR2	0	-0.77223	0.568	0.893	0	EC4	Mesenchymal
MIR99AHG	0	-0.789447	0.349	0.774	0	EC4	Mesenchymal
EPB41L4A	0	-0.800805	0.078	0.636	0	EC4	Mesenchymal
SNRK	0	-0.819886	0.355	0.773	0	EC4	Mesenchymal
EXOC6	0	-0.829423	0.312	0.766	0	EC4	Mesenchymal
MAST4	0	-0.842821	0.461	0.872	0	EC4	Mesenchymal
HHIP	0	-0.865897	0.673	0.915	0	EC4	Mesenchymal
PRKCH	0	-0.877464	0.144	0.699	0	EC4	Mesenchymal
PDE4D	0	-0.892884	0.45	0.874	0	EC4	Mesenchymal
PECAM1	0	-0.903646	0.217	0.763	0	EC4	Mesenchymal
ARHGAP29	0	-0.910565	0.387	0.877	0	EC4	Mesenchymal
FOXO1	0	-0.913589	0.438	0.884	0	EC4	Mesenchymal
ST6GAL1	0	-0.91764	0.322	0.731	0	EC4	Mesenchymal
FLRT2	0	-0.921275	0.324	0.806	0	EC4	Mesenchymal
MECOM	0	-0.966293	0.586	0.967	0	EC4	Mesenchymal
ARHGEF28	0	-0.978555	0.205	0.793	0	EC4	Mesenchymal
LAMA4	0	-0.986987	0.326	0.864	0	EC4	Mesenchymal
MAML3	0	-1.01461	0.164	0.726	0	EC4	Mesenchymal
PLCL1	0	-1.04191	0.233	0.749	0	EC4	Mesenchymal
CFAP54	0	-1.04329	0.072	0.683	0	EC4	Mesenchymal
PTPRB	0	-1.07825	0.274	0.886	0	EC4	Mesenchymal
LINC02742	0	-1.08552	0.116	0.657	0	EC4	Mesenchymal
CASC15	0	-1.12344	0.251	0.78	0	EC4	Mesenchymal
FRMD5	0	-1.13077	0.245	0.829	0	EC4	Mesenchymal
ELMO1	0	-1.13909	0.059	0.772	0	EC4	Mesenchymal
NRCAM	0	-1.15916	0.183	0.728	0	EC4	Mesenchymal
CALCRL	0	-1.16631	0.169	0.758	0	EC4	Mesenchymal
DOCK4	0	-1.17393	0.416	0.935	0	EC4	Mesenchymal
ERG	0	-1.20175	0.186	0.869	0	EC4	Mesenchymal
FRMD4B	0	-1.20421	0.114	0.862	0	EC4	Mesenchymal
ZNF521	0	-1.24017	0.114	0.798	0	EC4	Mesenchymal
NRG1	0	-1.2748	0.198	0.711	0	EC4	Mesenchymal
BMP6	0	-1.2939	0.24	0.887	0	EC4	Mesenchymal
NLGN1	0	-1.33509	0.229	0.829	0	EC4	Mesenchymal
ZNF804A	1.06775e-307	0.562966	0.453	0.109	3.90807e-303	EC4	Mesenchymal
PARPBP	5.54065e-307	0.327213	0.364	0.097	2.02794e-302	EC2	Proliferative
MRC2	2.95535e-306	0.533344	0.73	0.328	1.08169e-301	EC4	Mesenchymal
PDE4D	1.83031e-305	0.426118	0.961	0.806	6.69911e-301	EC1	Angiogenic
VEGFC	5.81933e-305	-0.768073	0.109	0.546	2.12993e-300	EC1	Angiogenic
PRC1	1.03295e-304	0.285467	0.308	0.066	3.78071e-300	EC2	Proliferative
COL13A1	1.12065e-304	0.403873	0.491	0.178	4.10171e-300	EC2	Proliferative
DAPK1	1.56469e-304	-0.743675	0.198	0.684	5.72691e-300	EC4	Mesenchymal
SH2D4A	1.31184e-302	0.272795	0.237	0.027	4.80145e-298	EC4	Mesenchymal
IGFBP3	2.34828e-301	0.662761	0.742	0.327	8.59495e-297	EC4	Mesenchymal
MTUS1	7.12121e-301	-0.835184	0.135	0.616	2.60644e-296	EC4	Mesenchymal
CLVS1	9.28137e-301	0.309936	0.159	0.01	3.39707e-296	EC1	Angiogenic
GRK5	1.19571e-300	0.527001	0.784	0.571	4.37642e-296	EC1	Angiogenic
LRMDA	1.99685e-300	-0.899018	0.225	0.677	7.30867e-296	EC4	Mesenchymal
FLNA	2.89228e-300	0.476253	0.956	0.715	1.0586e-295	EC4	Mesenchymal
TRPS1	3.37335e-299	0.58954	0.859	0.449	1.23468e-294	EC4	Mesenchymal
DOCK4	5.08994e-299	0.379559	0.976	0.863	1.86297e-294	EC1	Angiogenic
RRM2	5.12443e-298	0.293213	0.29	0.061	1.87559e-293	EC2	Proliferative
TCF4	8.08333e-298	-0.491174	0.841	0.942	2.95858e-293	EC4	Mesenchymal
EDN1	1.6232e-297	0.359992	0.836	0.603	5.94107e-293	EC3	Activated mesenchymal-like
DACH1	8.32434e-297	0.668774	0.512	0.191	3.04679e-292	EC1	Angiogenic
SULT1B1	1.17177e-296	0.508065	0.82	0.493	4.2888e-292	EC2	Proliferative
NOTCH2	1.85505e-295	0.52586	0.682	0.287	6.78967e-291	EC4	Mesenchymal
HS6ST3	2.4264e-295	0.465543	0.458	0.159	8.88087e-291	EC2	Proliferative
ELN	6.0527e-295	0.627093	0.377	0.082	2.21535e-290	EC4	Mesenchymal
APP	1.21324e-294	-0.457817	0.818	0.917	4.44059e-290	EC4	Mesenchymal
BMP6	7.87419e-294	0.36124	0.941	0.725	2.88203e-289	EC3	Activated mesenchymal-like
MOV10L1	1.59867e-293	0.368995	0.642	0.36	5.8513e-289	EC3	Activated mesenchymal-like
BARD1	4.85639e-293	0.364732	0.377	0.108	1.77749e-288	EC2	Proliferative
CD9	6.53475e-293	-0.599295	0.505	0.806	2.39179e-288	EC4	Mesenchymal
ADAMTSL1	1.32355e-292	0.478854	0.663	0.308	4.84432e-288	EC2	Proliferative
CKAP2L	1.78134e-292	0.259271	0.261	0.048	6.51988e-288	EC2	Proliferative
ITGA2	2.48101e-292	0.467347	0.813	0.491	9.08075e-288	EC2	Proliferative
SMC4	2.40647e-290	0.483044	0.59	0.289	8.80794e-286	EC2	Proliferative
KALRN	2.75562e-289	0.573338	0.507	0.197	1.00858e-284	EC1	Angiogenic
DOCK9	1.31661e-288	0.489203	0.844	0.619	4.81893e-284	EC1	Angiogenic
CHSY3	1.20372e-287	0.616435	0.695	0.287	4.40572e-283	EC4	Mesenchymal
CYTH3	3.17172e-287	0.544325	0.654	0.262	1.16088e-282	EC4	Mesenchymal
ARL15	3.46148e-287	0.439761	0.886	0.758	1.26694e-282	EC1	Angiogenic
TPX2	3.64555e-287	0.397401	0.426	0.145	1.33431e-282	EC2	Proliferative
CSGALNACT1	2.21513e-286	0.700727	0.564	0.257	8.10759e-282	EC1	Angiogenic
EPS8	5.17072e-286	0.582417	0.785	0.375	1.89253e-281	EC4	Mesenchymal
PDE10A	5.81939e-286	-0.709834	0.29	0.74	2.12996e-281	EC5	Procoagulatory
ZNF521	6.87086e-286	-0.750252	0.344	0.775	2.5148e-281	EC5	Procoagulatory
MT-ATP8	2.03012e-285	0.489621	0.866	0.642	7.43044e-281	EC2	Proliferative
NSD2	3.0606e-285	0.453113	0.721	0.438	1.12021e-280	EC2	Proliferative
EVA1C	1.39677e-284	0.433945	0.757	0.422	5.11233e-280	EC2	Proliferative
CENPP	1.77721e-284	0.450887	0.529	0.219	6.50477e-280	EC2	Proliferative
EFNA5	8.34465e-284	-0.823658	0.191	0.652	3.05423e-279	EC4	Mesenchymal
ACTA2	1.13945e-283	0.648618	0.531	0.18	4.17048e-279	EC4	Mesenchymal
PRKG1	2.69873e-283	-0.502619	0.683	0.903	9.87764e-279	EC1	Angiogenic
KIF14	3.36628e-283	0.317181	0.337	0.089	1.23209e-278	EC2	Proliferative
DOCK2	3.91831e-283	0.310654	0.403	0.122	1.43414e-278	EC2	Proliferative
GABBR2	4.8451e-283	0.449606	0.495	0.185	1.77335e-278	EC2	Proliferative
ADAM9	7.19269e-283	-0.486961	0.525	0.845	2.6326e-278	EC1	Angiogenic
GFPT2	3.71186e-281	0.414307	0.406	0.095	1.35858e-276	EC4	Mesenchymal
CHD7	1.31436e-280	0.521802	0.685	0.397	4.81068e-276	EC1	Angiogenic
LDB2	3.74124e-280	0.690231	0.736	0.512	1.36933e-275	EC1	Angiogenic
CD44	5.46676e-280	-0.576765	0.381	0.749	2.00089e-275	EC1	Angiogenic
ADAM12	6.11873e-280	0.500843	0.513	0.151	2.23952e-275	EC4	Mesenchymal
XIST	9.32299e-280	-0.982411	0.002	0.473	3.41231e-275	EC5	Procoagulatory
MAP1B	2.89428e-279	0.379939	0.98	0.838	1.05933e-274	EC4	Mesenchymal
ATAD5	3.54056e-279	0.325577	0.38	0.113	1.29588e-274	EC2	Proliferative
TXNDC5	4.5954e-279	-0.480955	0.685	0.87	1.68196e-274	EC4	Mesenchymal
FRYL	5.3072e-279	-0.4829	0.671	0.869	1.94249e-274	EC4	Mesenchymal
RUNX1	5.57035e-279	-0.61965	0.187	0.604	2.0388e-274	EC1	Angiogenic
RASGRF2	1.13964e-278	-0.757869	0.103	0.581	4.17118e-274	EC4	Mesenchymal
THBS2	1.85e-278	-0.458291	0.081	0.306	6.77119e-274	EC3	Activated mesenchymal-like
NAV1	2.21307e-278	0.424889	0.97	0.772	8.10007e-274	EC4	Mesenchymal
DIAPH3	3.14734e-278	0.581541	0.634	0.344	1.15196e-273	EC2	Proliferative
SHCBP1	7.18784e-278	0.250581	0.274	0.056	2.63082e-273	EC2	Proliferative
LIMCH1	3.64893e-277	0.594087	0.707	0.41	1.33554e-272	EC1	Angiogenic
ADAMTS18	4.68826e-277	0.696877	0.39	0.117	1.71595e-272	EC1	Angiogenic
RGS4	1.22179e-276	0.50707	0.58	0.202	4.47186e-272	EC4	Mesenchymal
NDC1	4.62868e-276	0.312079	0.383	0.116	1.69414e-271	EC2	Proliferative
ASPH	8.77207e-276	0.454808	0.943	0.722	3.21067e-271	EC4	Mesenchymal
PREX2	1.03767e-274	-0.787746	0.025	0.49	3.79797e-270	EC5	Procoagulatory
SVIL	3.11506e-274	-0.522122	0.663	0.884	1.14014e-269	EC4	Mesenchymal
PTCHD4	3.19908e-273	0.579903	0.712	0.387	1.17089e-268	EC1	Angiogenic
FKBP10	4.60413e-273	0.495388	0.766	0.392	1.68516e-268	EC4	Mesenchymal
ATAD2	3.45081e-272	0.400099	0.427	0.15	1.26303e-267	EC2	Proliferative
SLC1A4	4.07458e-272	0.343356	0.381	0.088	1.49134e-267	EC4	Mesenchymal
LIMA1	4.20969e-272	0.526723	0.804	0.457	1.54079e-267	EC4	Mesenchymal
THSD4	1.09883e-271	-0.676264	0.436	0.795	4.02182e-267	EC4	Mesenchymal
GNA14	1.3536e-271	0.603525	0.431	0.128	4.95433e-267	EC5	Procoagulatory
TPM1	2.317e-271	0.403152	0.988	0.882	8.48046e-267	EC4	Mesenchymal
GAPDH	2.61525e-271	0.322012	0.985	0.905	9.57207e-267	EC4	Mesenchymal
NFAT5	6.81063e-271	0.325591	0.941	0.885	2.49276e-266	EC1	Angiogenic
ACSM3	1.17202e-270	0.618386	0.309	0.094	4.2897e-266	EC3	Activated mesenchymal-like
NTN4	1.27761e-270	0.597747	0.864	0.525	4.67619e-266	EC4	Mesenchymal
UVRAG	1.54609e-270	-0.535357	0.566	0.816	5.65884e-266	EC4	Mesenchymal
SHROOM4	3.71879e-270	-0.683224	0.237	0.66	1.36111e-265	EC4	Mesenchymal
ABI3BP	1.4821e-269	0.670163	0.879	0.613	5.42464e-265	EC5	Procoagulatory
PLPP1	2.46071e-269	0.671932	0.729	0.376	9.00644e-265	EC4	Mesenchymal
PCOLCE2	3.49682e-269	0.322045	0.316	0.058	1.27987e-264	EC4	Mesenchymal
NID2	4.19772e-269	0.40309	0.465	0.125	1.53641e-264	EC4	Mesenchymal
GARS	5.08872e-269	0.501809	0.843	0.504	1.86252e-264	EC4	Mesenchymal
EXOC6B	5.84267e-269	-0.383481	0.846	0.941	2.13848e-264	EC4	Mesenchymal
GLIS3	1.44875e-268	0.547646	0.917	0.548	5.30257e-264	EC4	Mesenchymal
COL4A2	3.60331e-268	0.462748	0.954	0.759	1.31885e-263	EC4	Mesenchymal
VEGFA	6.76523e-268	0.491784	0.565	0.205	2.47614e-263	EC4	Mesenchymal
EMCN	6.79028e-268	0.565501	0.757	0.425	2.48531e-263	EC1	Angiogenic
ADAMTS6	4.0214e-267	0.380612	0.962	0.771	1.47187e-262	EC2	Proliferative
SULF2	4.17863e-267	0.503708	0.541	0.236	1.52942e-262	EC1	Angiogenic
FBN1	3.67857e-266	-0.483536	0.613	0.775	1.34639e-261	EC2	Proliferative
POT1-AS1	4.33455e-266	0.55008	0.484	0.164	1.58649e-261	EC5	Procoagulatory
RALGAPA2	1.34859e-264	-0.724594	0.281	0.68	4.93596e-260	EC4	Mesenchymal
RBL1	2.12668e-264	0.307784	0.346	0.098	7.78386e-260	EC2	Proliferative
MIR222HG	3.91257e-264	0.420589	0.783	0.458	1.43204e-259	EC2	Proliferative
TACC3	4.56865e-264	0.313725	0.366	0.111	1.67217e-259	EC2	Proliferative
BTBD11	1.78902e-263	0.404922	0.43	0.153	6.54799e-259	EC2	Proliferative
CDH13	3.58096e-263	0.419605	0.985	0.826	1.31067e-258	EC4	Mesenchymal
PTPRM	5.64099e-263	-0.2838	0.843	0.919	2.06466e-258	EC3	Activated mesenchymal-like
CDH11	6.12184e-263	-0.54965	0.488	0.825	2.24065e-258	EC1	Angiogenic
RANBP17	3.55827e-262	-0.692596	0.02	0.474	1.30236e-257	EC5	Procoagulatory
P4HA2	5.04956e-262	0.483245	0.642	0.273	1.84819e-257	EC4	Mesenchymal
MXRA7	7.50517e-262	0.469775	0.612	0.238	2.74697e-257	EC4	Mesenchymal
EZH2	1.73076e-261	0.375429	0.458	0.172	6.33475e-257	EC2	Proliferative
COL5A2	1.77061e-261	0.423728	0.972	0.782	6.4806e-257	EC4	Mesenchymal
KIF26B	1.90411e-261	0.414709	0.301	0.056	6.96922e-257	EC4	Mesenchymal
EXT1	6.75992e-261	-0.286832	0.951	0.991	2.4742e-256	EC1	Angiogenic
NCALD	2.93756e-260	0.317175	0.16	0.013	1.07518e-255	EC5	Procoagulatory
LTBP1	6.96198e-260	0.586407	0.76	0.374	2.54816e-255	EC4	Mesenchymal
FILIP1	4.15336e-259	0.585718	0.42	0.146	1.52017e-254	EC1	Angiogenic
MYO5C	1.05857e-258	0.304714	0.215	0.033	3.87449e-254	EC1	Angiogenic
KIF23	1.57357e-258	0.263244	0.276	0.063	5.75944e-254	EC2	Proliferative
FNIP2	2.00721e-258	0.526792	0.721	0.355	7.34658e-254	EC4	Mesenchymal
AC092353.2	3.38582e-258	0.432449	0.34	0.119	1.23925e-253	EC3	Activated mesenchymal-like
RBMS3	3.13675e-257	0.251143	0.995	0.967	1.14808e-252	EC5	Procoagulatory
EBF1	7.52891e-257	-0.356719	0.043	0.245	2.75566e-252	EC3	Activated mesenchymal-like
LDHA	1.97575e-256	0.484988	0.849	0.545	7.23143e-252	EC4	Mesenchymal
NFIB	3.06062e-256	-0.422309	0.828	0.95	1.12022e-251	EC4	Mesenchymal
TCF12	1.21959e-255	-0.289248	0.924	0.967	4.46381e-251	EC4	Mesenchymal
CDH2	1.64642e-255	-0.58498	0.465	0.773	6.02607e-251	EC1	Angiogenic
SGO2	4.4018e-255	0.306019	0.33	0.093	1.6111e-250	EC2	Proliferative
PDE3A	3.06335e-254	-0.508421	0.668	0.911	1.12122e-249	EC1	Angiogenic
PLEKHG1	4.74953e-254	0.607242	0.624	0.359	1.73837e-249	EC1	Angiogenic
ECT2	7.44435e-254	0.404802	0.51	0.223	2.72471e-249	EC2	Proliferative
CRYAB	1.01469e-253	0.310974	0.285	0.05	3.71385e-249	EC4	Mesenchymal
TMEM200A	1.36196e-253	0.30548	0.275	0.046	4.9849e-249	EC4	Mesenchymal
DTL	1.36787e-253	0.264815	0.231	0.043	5.00655e-249	EC2	Proliferative
EGFL7	2.55665e-253	-0.640097	0.216	0.635	9.35761e-249	EC4	Mesenchymal
JDP2	5.40703e-253	0.253574	0.264	0.043	1.97903e-248	EC4	Mesenchymal
YES1	5.93052e-253	0.399805	0.822	0.564	2.17063e-248	EC2	Proliferative
PRRX1	1.50334e-252	0.515558	0.518	0.18	5.50239e-248	EC5	Procoagulatory
ADORA2B	4.45522e-252	0.291296	0.257	0.041	1.63065e-247	EC4	Mesenchymal
HES4	1.00553e-251	0.304871	0.356	0.079	3.68034e-247	EC4	Mesenchymal
IGFBP6	1.38122e-251	0.345569	0.353	0.079	5.05542e-247	EC4	Mesenchymal
PTPRB	2.16735e-251	-0.520138	0.591	0.85	7.93273e-247	EC5	Procoagulatory
NRXN3	4.62062e-251	0.606491	0.587	0.222	1.69119e-246	EC4	Mesenchymal
FGF2	1.96505e-250	0.548613	0.695	0.304	7.1923e-246	EC4	Mesenchymal
SULF1	2.09445e-250	-0.786349	0.382	0.711	7.66588e-246	EC1	Angiogenic
PHACTR1	4.66199e-250	-0.66694	0.075	0.527	1.70633e-245	EC4	Mesenchymal
TSPAN5	9.82119e-250	-0.620243	0.291	0.706	3.59465e-245	EC5	Procoagulatory
FARP1	4.0309e-249	-0.579	0.117	0.577	1.47535e-244	EC5	Procoagulatory
RFLNA	4.41389e-249	0.345987	0.402	0.173	1.61553e-244	EC3	Activated mesenchymal-like
CALD1	4.99543e-249	0.338741	0.991	0.944	1.82838e-244	EC4	Mesenchymal
DOCK9	6.82619e-249	-0.670597	0.33	0.69	2.49845e-244	EC4	Mesenchymal
TPM4	1.14899e-248	0.364938	0.954	0.8	4.20543e-244	EC4	Mesenchymal
HAPLN1	1.49077e-248	0.350101	0.21	0.028	5.45637e-244	EC5	Procoagulatory
CD93	1.7016e-248	0.500072	0.552	0.266	6.22801e-244	EC1	Angiogenic
BGN	1.83488e-248	0.51196	0.867	0.48	6.71583e-244	EC4	Mesenchymal
TJP2	1.26541e-246	0.390356	0.794	0.502	4.63153e-242	EC2	Proliferative
AMPH	2.06801e-246	0.378121	0.295	0.092	7.56914e-242	EC3	Activated mesenchymal-like
FRMD4B	2.04129e-245	0.374227	0.93	0.757	7.47133e-241	EC1	Angiogenic
SYT1	3.21803e-245	0.547585	0.673	0.264	1.17783e-240	EC4	Mesenchymal
VCAN	7.76305e-245	-0.723487	0.122	0.494	2.84135e-240	EC1	Angiogenic
NFATC2	1.1258e-244	0.458987	0.393	0.128	4.12052e-240	EC1	Angiogenic
CD9	2.28582e-244	-0.533652	0.489	0.81	8.36632e-240	EC5	Procoagulatory
TCF4	4.40744e-244	0.305606	0.948	0.928	1.61317e-239	EC1	Angiogenic
ST8SIA6	4.51346e-244	0.558229	0.383	0.124	1.65197e-239	EC1	Angiogenic
PTPRK	6.89963e-244	0.284766	0.98	0.885	2.52534e-239	EC2	Proliferative
IGFBP4	8.50247e-244	0.511927	0.545	0.254	3.11199e-239	EC1	Angiogenic
NAV3	1.67971e-243	0.412747	0.885	0.641	6.14791e-239	EC2	Proliferative
GALNT1	2.06031e-243	-0.465538	0.707	0.862	7.54092e-239	EC4	Mesenchymal
CEP170	2.7392e-243	0.286793	0.946	0.821	1.00258e-238	EC2	Proliferative
ACTG1	2.82038e-243	0.313277	0.983	0.897	1.03229e-238	EC4	Mesenchymal
MYRIP	3.20492e-243	0.449891	0.659	0.315	1.17303e-238	EC2	Proliferative
CELF2	3.88059e-243	-0.635557	0.393	0.752	1.42034e-238	EC4	Mesenchymal
SEMA5A	4.36366e-243	0.599542	0.841	0.409	1.59714e-238	EC4	Mesenchymal
PDZRN3	6.32078e-243	0.372719	0.327	0.069	2.31347e-238	EC4	Mesenchymal
PRKCH	6.38817e-243	0.441107	0.833	0.607	2.33813e-238	EC1	Angiogenic
THBS2	8.90991e-243	0.480763	0.52	0.168	3.26112e-238	EC5	Procoagulatory
SULT1B1	2.28059e-242	-0.652412	0.229	0.615	8.34719e-238	EC1	Angiogenic
KIF13A	6.76346e-242	-0.455742	0.723	0.868	2.47549e-237	EC4	Mesenchymal
SLC7A2	1.38151e-241	0.456411	0.684	0.441	5.05647e-237	EC3	Activated mesenchymal-like
CAMK2D	6.00451e-241	0.504601	0.899	0.7	2.19771e-236	EC5	Procoagulatory
NRG1	1.5092e-240	0.507203	0.883	0.6	5.52384e-236	EC2	Proliferative
OSMR	1.80063e-240	0.502029	0.791	0.447	6.59047e-236	EC4	Mesenchymal
MICAL2	1.02923e-239	-0.480671	0.49	0.818	3.76708e-235	EC1	Angiogenic
MTHFD2	1.76854e-239	0.441157	0.571	0.221	6.47303e-235	EC4	Mesenchymal
CCDC150	7.30879e-239	0.257664	0.293	0.076	2.67509e-234	EC2	Proliferative
PIK3C2B	1.21554e-238	0.489129	0.472	0.193	4.449e-234	EC1	Angiogenic
DBF4	1.36379e-238	0.2693	0.321	0.092	4.99161e-234	EC2	Proliferative
TPM1	4.10343e-238	-0.415917	0.779	0.913	1.5019e-233	EC1	Angiogenic
PTPRK	7.57141e-238	-0.430918	0.805	0.916	2.77121e-233	EC4	Mesenchymal
CARD8	2.82837e-237	0.377331	0.777	0.467	1.03521e-232	EC2	Proliferative
ADK	1.35886e-236	-0.430913	0.667	0.882	4.97356e-232	EC1	Angiogenic
SULF1	1.9346e-236	-0.686925	0.511	0.7	7.08083e-232	EC2	Proliferative
MOV10L1	3.84515e-236	-0.613324	0.086	0.529	1.40736e-231	EC4	Mesenchymal
CMSS1	6.45219e-236	0.392217	0.784	0.505	2.36157e-231	EC2	Proliferative
EMP1	9.83865e-236	0.37551	0.781	0.475	3.60104e-231	EC2	Proliferative
VRK1	1.75111e-235	0.325426	0.439	0.167	6.40924e-231	EC2	Proliferative
BAZ2B	8.51992e-235	-0.470024	0.628	0.858	3.11838e-230	EC4	Mesenchymal
SLC7A11	1.97897e-234	-0.540223	0.442	0.771	7.24324e-230	EC1	Angiogenic
SCG5	5.45396e-234	0.284597	0.258	0.046	1.9962e-229	EC4	Mesenchymal
ADAMTS2	5.12886e-233	-0.307304	0.009	0.167	1.87721e-228	EC3	Activated mesenchymal-like
PKD1L1	8.69009e-233	0.485628	0.403	0.14	3.18066e-228	EC1	Angiogenic
ITGA6	1.12187e-232	0.378342	0.634	0.312	4.10616e-228	EC2	Proliferative
TMPO	2.5192e-232	0.355901	0.506	0.221	9.22051e-228	EC2	Proliferative
LAMC1	2.65485e-232	0.356855	0.958	0.834	9.71701e-228	EC4	Mesenchymal
FMNL2	2.86928e-232	-0.554668	0.525	0.795	1.05019e-227	EC4	Mesenchymal
TGFBR1	3.34021e-232	0.453725	0.598	0.244	1.22255e-227	EC4	Mesenchymal
KAZN	3.68144e-232	0.357562	0.366	0.092	1.34744e-227	EC4	Mesenchymal
TNS1	5.06207e-232	0.467318	0.704	0.334	1.85277e-227	EC4	Mesenchymal
FAM107B	6.29477e-232	0.315555	0.944	0.783	2.30395e-227	EC2	Proliferative
SUGCT	1.60886e-231	0.466101	0.532	0.194	5.88858e-227	EC4	Mesenchymal
TTC28	2.49332e-231	0.2578	0.966	0.917	9.1258e-227	EC1	Angiogenic
PLXNA4	8.27369e-231	-0.777885	0.107	0.536	3.02825e-226	EC4	Mesenchymal
TTC28	1.64589e-229	-0.361605	0.838	0.934	6.02413e-225	EC4	Mesenchymal
VEPH1	2.21179e-229	-0.440182	0.744	0.887	8.09537e-225	EC4	Mesenchymal
EPB41L3	1.45914e-228	0.392958	0.649	0.333	5.34062e-224	EC2	Proliferative
GBP4	2.75824e-228	0.294477	0.34	0.128	1.00954e-223	EC3	Activated mesenchymal-like
MIPOL1	4.14765e-228	-0.554133	0.429	0.733	1.51808e-223	EC4	Mesenchymal
ABI3BP	4.28862e-228	-0.745353	0.374	0.69	1.56968e-223	EC1	Angiogenic
KCTD16	5.47062e-228	-0.652828	0.106	0.468	2.0023e-223	EC1	Angiogenic
VMP1	5.88721e-228	-0.392066	0.663	0.922	2.15478e-223	EC1	Angiogenic
FTH1	1.54098e-227	-0.290722	0.911	0.943	5.64014e-223	EC2	Proliferative
CD109	1.75469e-227	0.484892	0.526	0.249	6.42234e-223	EC1	Angiogenic
ZFPM2	8.62673e-227	-0.26953	0.922	0.961	3.15747e-222	EC1	Angiogenic
FGD5	9.79955e-226	-0.571215	0.107	0.538	3.58673e-221	EC4	Mesenchymal
MCTP1	2.23962e-225	-0.871219	0.052	0.461	8.19725e-221	EC5	Procoagulatory
CCDC18	2.30803e-225	0.358327	0.476	0.207	8.44763e-221	EC2	Proliferative
NAV2	6.37106e-225	0.370459	0.913	0.711	2.33187e-220	EC2	Proliferative
PRXL2A	1.72981e-224	0.461082	0.497	0.224	6.33129e-220	EC1	Angiogenic
RNF144A	1.83068e-224	0.291975	0.191	0.03	6.70047e-220	EC1	Angiogenic
LINC01133	5.81332e-224	0.342266	0.406	0.108	2.12773e-219	EC4	Mesenchymal
MAPK10	1.32057e-223	0.518218	0.447	0.165	4.83343e-219	EC5	Procoagulatory
LINC02742	3.00281e-223	-0.667474	0.319	0.649	1.09906e-218	EC1	Angiogenic
DSTN	1.94853e-222	0.419122	0.891	0.659	7.13181e-218	EC4	Mesenchymal
WDFY2	2.58721e-222	0.483566	0.635	0.291	9.46944e-218	EC4	Mesenchymal
TLN2	3.63779e-222	0.292337	0.32	0.073	1.33147e-217	EC4	Mesenchymal
ABLIM1	4.16905e-222	0.488565	0.733	0.48	1.52591e-217	EC1	Angiogenic
MIR4435-2HG	4.25002e-222	0.466159	0.839	0.54	1.55555e-217	EC4	Mesenchymal
PRKG1	4.33975e-222	0.38495	0.98	0.857	1.58839e-217	EC4	Mesenchymal
CFAP54	7.85382e-222	-0.670591	0.285	0.661	2.87458e-217	EC5	Procoagulatory
DCBLD2	4.23833e-220	-0.560779	0.416	0.724	1.55127e-215	EC1	Angiogenic
PREX2	7.78016e-220	-0.720608	0.059	0.482	2.84762e-215	EC4	Mesenchymal
PLSCR4	2.46018e-219	-0.633802	0.39	0.708	9.00452e-215	EC4	Mesenchymal
BRCA1	4.81619e-219	0.283228	0.346	0.113	1.76277e-214	EC2	Proliferative
FLNB	1.35159e-218	-0.420279	0.694	0.916	4.94696e-214	EC5	Procoagulatory
ARHGAP18	1.71034e-218	-0.567044	0.499	0.781	6.26001e-214	EC4	Mesenchymal
AC098588.3	1.90196e-218	-0.663304	0.17	0.566	6.96135e-214	EC4	Mesenchymal
KCNS3	2.14901e-218	0.332097	0.474	0.241	7.86558e-214	EC3	Activated mesenchymal-like
HMGA1	2.95463e-218	0.323004	0.535	0.243	1.08142e-213	EC2	Proliferative
ICA1	5.19224e-218	-0.554962	0.035	0.452	1.90041e-213	EC4	Mesenchymal
SLC12A2	7.96061e-218	0.502178	0.786	0.597	2.91366e-213	EC1	Angiogenic
PTPN13	9.50865e-218	0.388997	0.499	0.17	3.48026e-213	EC4	Mesenchymal
PRKCA	3.40949e-217	0.319206	0.946	0.766	1.24791e-212	EC2	Proliferative
PRKDC	9.97796e-217	0.32768	0.877	0.653	3.65203e-212	EC2	Proliferative
ACER3	1.19458e-216	0.362613	0.76	0.494	4.37228e-212	EC2	Proliferative
SHROOM4	4.24258e-216	0.42049	0.782	0.585	1.55283e-211	EC1	Angiogenic
CDH6	4.94965e-216	0.393519	0.439	0.129	1.81162e-211	EC4	Mesenchymal
MET	9.71048e-216	-0.620016	0.096	0.505	3.55413e-211	EC4	Mesenchymal
TMC1	1.00207e-215	0.382229	0.274	0.069	3.66766e-211	EC1	Angiogenic
AC113383.1	1.86647e-215	0.367658	0.284	0.064	6.83148e-211	EC5	Procoagulatory
CHN1	2.34158e-215	0.502811	0.651	0.411	8.5704e-211	EC1	Angiogenic
STYK1	6.35013e-215	0.310124	0.464	0.19	2.32421e-210	EC2	Proliferative
NLGN1	9.54492e-215	0.367923	0.908	0.657	3.49354e-210	EC3	Activated mesenchymal-like
WDHD1	1.30805e-214	0.264036	0.341	0.11	4.7876e-210	EC2	Proliferative
DIAPH3	1.39913e-214	-0.625248	0.1	0.454	5.12097e-210	EC1	Angiogenic
AL353138.1	1.84013e-214	-0.660648	0.109	0.519	6.73508e-210	EC4	Mesenchymal
SLC7A2	4.93893e-214	-0.679182	0.236	0.6	1.8077e-209	EC1	Angiogenic
SMAD1	6.7214e-214	0.500415	0.635	0.408	2.4601e-209	EC1	Angiogenic
GBE1	7.63707e-214	-0.451079	0.622	0.864	2.79524e-209	EC1	Angiogenic
ADAMTS6	1.17249e-213	-0.578683	0.523	0.846	4.29145e-209	EC5	Procoagulatory
SLIT3	2.64881e-213	-0.608946	0.078	0.424	9.6949e-209	EC1	Angiogenic
NOTCH4	8.39741e-213	0.300005	0.225	0.046	3.07354e-208	EC1	Angiogenic
COL6A3	1.01709e-212	-0.501384	0.06	0.239	3.72267e-208	EC3	Activated mesenchymal-like
FRMD3	1.77116e-212	0.340866	0.43	0.173	6.48261e-208	EC2	Proliferative
LINC01266	5.20602e-212	0.265083	0.169	0.02	1.90545e-207	EC5	Procoagulatory
SLC35F2	8.11067e-212	0.321598	0.552	0.254	2.96859e-207	EC2	Proliferative
CERCAM	1.24514e-211	0.293056	0.364	0.096	4.55735e-207	EC4	Mesenchymal
SULF1	3.28077e-211	0.590709	0.897	0.632	1.2008e-206	EC5	Procoagulatory
PLXNA4	1.48584e-210	0.415235	0.752	0.426	5.43831e-206	EC2	Proliferative
SASH1	1.79088e-210	-0.257663	0.757	0.857	6.55481e-206	EC3	Activated mesenchymal-like
ZNF609	1.89067e-210	-0.397972	0.697	0.863	6.92003e-206	EC4	Mesenchymal
RASGRF2	1.93463e-210	0.343394	0.652	0.437	7.08093e-206	EC3	Activated mesenchymal-like
CCN2	3.84514e-210	-0.441059	0.553	0.833	1.40736e-205	EC1	Angiogenic
AL355612.1	4.19179e-210	0.527508	0.513	0.211	1.53424e-205	EC5	Procoagulatory
RUNX1T1	6.03602e-210	-0.694075	0.212	0.596	2.20924e-205	EC4	Mesenchymal
NHSL1	6.44708e-210	0.383221	0.851	0.597	2.35969e-205	EC2	Proliferative
PTGIS	8.93403e-210	0.555533	0.734	0.422	3.26994e-205	EC5	Procoagulatory
THSD7A	6.02321e-209	-0.748685	0.047	0.451	2.20456e-204	EC4	Mesenchymal
S100A4	6.42375e-209	0.275202	0.248	0.046	2.35116e-204	EC4	Mesenchymal
DDR2	8.42788e-209	0.441879	0.863	0.569	3.08469e-204	EC4	Mesenchymal
YAP1	9.27685e-209	0.443931	0.811	0.483	3.39542e-204	EC4	Mesenchymal
RALA	1.05625e-208	0.25001	0.916	0.823	3.86598e-204	EC3	Activated mesenchymal-like
MCAM	1.38284e-208	-0.605087	0.245	0.613	5.06133e-204	EC4	Mesenchymal
NETO2	2.46547e-208	0.296867	0.399	0.15	9.02385e-204	EC2	Proliferative
GRIK2	3.26624e-208	-0.378303	0.015	0.165	1.19548e-203	EC3	Activated mesenchymal-like
EPB41L3	7.84528e-208	-0.585467	0.047	0.441	2.87145e-203	EC5	Procoagulatory
TXNRD1	1.79265e-207	-0.447678	0.524	0.813	6.56129e-203	EC1	Angiogenic
ITGBL1	2.7672e-207	0.622381	0.694	0.38	1.01282e-202	EC4	Mesenchymal
RNF144B	2.88267e-207	-0.651425	0.095	0.494	1.05509e-202	EC4	Mesenchymal
SAT1	3.21882e-207	0.326037	0.819	0.684	1.17812e-202	EC3	Activated mesenchymal-like
COLEC12	4.36081e-207	-0.676271	0.082	0.484	1.5961e-202	EC4	Mesenchymal
MYRIP	5.34282e-207	-0.432789	0.258	0.479	1.95552e-202	EC3	Activated mesenchymal-like
DMD	6.43343e-207	-0.599035	0.123	0.472	2.3547e-202	EC1	Angiogenic
SNCA	8.64099e-207	-0.57554	0.043	0.433	3.16269e-202	EC5	Procoagulatory
SEMA3C	1.96534e-206	0.411973	0.621	0.415	7.19336e-202	EC3	Activated mesenchymal-like
COL25A1	4.27678e-206	0.31273	0.246	0.071	1.56535e-201	EC3	Activated mesenchymal-like
RRBP1	4.55596e-206	0.381701	0.899	0.682	1.66753e-201	EC4	Mesenchymal
AR	2.7968e-205	0.403101	0.354	0.101	1.02366e-200	EC5	Procoagulatory
NR3C1	2.99663e-205	-0.426724	0.568	0.84	1.0968e-200	EC1	Angiogenic
MTSS1	3.01865e-205	-0.621144	0.163	0.559	1.10486e-200	EC4	Mesenchymal
RGS3	4.23165e-205	-0.54943	0.182	0.571	1.54883e-200	EC4	Mesenchymal
BMPR1A	4.40105e-205	-0.462705	0.095	0.453	1.61083e-200	EC1	Angiogenic
ADTRP	5.27803e-205	0.266675	0.294	0.087	1.93181e-200	EC2	Proliferative
FNBP1L	5.38561e-205	-0.590774	0.201	0.584	1.97119e-200	EC4	Mesenchymal
ELMO1	1.00984e-204	-0.57491	0.381	0.737	3.69611e-200	EC5	Procoagulatory
NRG3	1.13998e-204	0.620114	0.387	0.113	4.17244e-200	EC4	Mesenchymal
PTCHD4	2.87771e-204	-0.713834	0.081	0.478	1.05327e-199	EC4	Mesenchymal
CYTOR	6.53365e-204	0.450273	0.781	0.47	2.39138e-199	EC4	Mesenchymal
NAV3	7.04385e-204	-0.533242	0.407	0.739	2.57812e-199	EC1	Angiogenic
RALA	1.01594e-203	-0.460468	0.679	0.887	3.71843e-199	EC5	Procoagulatory
KNTC1	1.58846e-203	0.264833	0.336	0.113	5.81393e-199	EC2	Proliferative
PTGS2	2.29551e-203	0.355962	0.67	0.466	8.4018e-199	EC3	Activated mesenchymal-like
DPYD	2.8358e-203	0.319265	0.968	0.882	1.03793e-198	EC5	Procoagulatory
CECR2	3.26747e-203	-0.512182	0.018	0.399	1.19593e-198	EC5	Procoagulatory
EMCN	3.3945e-203	-0.760578	0.129	0.515	1.24242e-198	EC4	Mesenchymal
MARCH3	3.78547e-203	0.333319	0.955	0.749	1.38552e-198	EC2	Proliferative
ABCA9-AS1	8.85943e-203	0.415831	0.349	0.103	3.24264e-198	EC5	Procoagulatory
SSH2	1.25118e-202	-0.39129	0.733	0.877	4.57946e-198	EC4	Mesenchymal
BMPR2	1.44791e-202	-0.301343	0.888	0.944	5.29949e-198	EC4	Mesenchymal
CARD8	2.08281e-202	-0.565432	0.2	0.568	7.62328e-198	EC4	Mesenchymal
LDB2	2.17096e-202	-0.859916	0.21	0.585	7.94595e-198	EC4	Mesenchymal
NR5A2	2.20204e-202	0.431246	0.471	0.215	8.05968e-198	EC2	Proliferative
SLCO2A1	2.28032e-202	0.362694	0.187	0.032	8.34619e-198	EC1	Angiogenic
C1orf198	2.34463e-202	0.268109	0.271	0.057	8.58159e-198	EC4	Mesenchymal
FLI1	3.03582e-202	0.301524	0.953	0.877	1.11114e-197	EC1	Angiogenic
FSTL1	5.94292e-202	-0.417448	0.543	0.827	2.17517e-197	EC1	Angiogenic
CHD7	7.29936e-202	-0.544989	0.093	0.485	2.67164e-197	EC5	Procoagulatory
SLIT3	3.1183e-201	0.590692	0.679	0.336	1.14133e-196	EC4	Mesenchymal
CAP2	3.60944e-201	0.410247	0.589	0.239	1.32109e-196	EC4	Mesenchymal
CDKN2B	5.32762e-201	0.31472	0.305	0.073	1.94996e-196	EC4	Mesenchymal
HSPG2	1.29722e-200	-0.310399	0.883	0.978	4.74797e-196	EC5	Procoagulatory
DKK3	2.64547e-200	0.426376	0.57	0.245	9.68269e-196	EC4	Mesenchymal
ADAMTS6	3.08719e-200	-0.444387	0.645	0.838	1.12994e-195	EC1	Angiogenic
ANTXR1	3.57431e-200	0.434438	0.713	0.316	1.30823e-195	EC4	Mesenchymal
ACE	4.30317e-200	0.314652	0.23	0.051	1.575e-195	EC1	Angiogenic
PDE5A	7.68481e-200	0.539963	0.592	0.298	2.81272e-195	EC5	Procoagulatory
PLXNA2	2.13574e-199	-0.537144	0.531	0.775	7.81701e-195	EC4	Mesenchymal
MYRIP	2.17077e-199	-0.738332	0.035	0.425	7.94523e-195	EC4	Mesenchymal
MSRB3	2.56819e-199	0.356496	0.932	0.769	9.39982e-195	EC4	Mesenchymal
RTTN	4.17156e-199	0.329593	0.48	0.22	1.52683e-194	EC2	Proliferative
ROBO1	8.14945e-199	-0.528197	0.338	0.669	2.98278e-194	EC1	Angiogenic
PTPRE	1.34346e-198	0.442842	0.74	0.524	4.91719e-194	EC1	Angiogenic
PTGIS	2.50609e-198	-0.50457	0.232	0.514	9.17253e-194	EC2	Proliferative
ARHGEF3	2.82481e-198	-0.594782	0.128	0.516	1.03391e-193	EC4	Mesenchymal
COL6A2	9.3912e-198	-0.403681	0.08	0.259	3.43727e-193	EC3	Activated mesenchymal-like
CADPS2	2.03754e-197	-0.547063	0.414	0.729	7.45759e-193	EC4	Mesenchymal
NLGN4Y	3.55436e-197	0.328031	0.267	0.059	1.30093e-192	EC5	Procoagulatory
IGF2BP3	7.68637e-197	0.309921	0.909	0.719	2.81329e-192	EC2	Proliferative
CLMP	4.42598e-196	0.519894	0.589	0.297	1.61995e-191	EC5	Procoagulatory
HELLS	6.52935e-196	0.310908	0.401	0.159	2.38981e-191	EC2	Proliferative
SIPA1L1	8.23936e-196	0.438928	0.889	0.656	3.01569e-191	EC4	Mesenchymal
PAPPA	1.54281e-195	-0.75898	0.091	0.41	5.64683e-191	EC1	Angiogenic
CCBE1	1.59419e-195	-0.565471	0.069	0.398	5.83491e-191	EC1	Angiogenic
SHTN1	1.69032e-195	-0.494588	0.152	0.552	6.18673e-191	EC5	Procoagulatory
JAG1	2.4853e-195	0.452182	0.806	0.497	9.09645e-191	EC4	Mesenchymal
COL4A1	6.64633e-195	-0.380142	0.686	0.782	2.43262e-190	EC2	Proliferative
PLIN2	8.13183e-195	0.348182	0.336	0.089	2.97633e-190	EC4	Mesenchymal
SRPX	9.36666e-195	0.327387	0.549	0.264	3.42829e-190	EC2	Proliferative
PTX3	2.13883e-194	-0.536494	0.307	0.633	7.82832e-190	EC1	Angiogenic
TGFB2	2.63683e-194	-0.600296	0.091	0.42	9.65106e-190	EC1	Angiogenic
SAMD3	2.80546e-194	0.278961	0.188	0.028	1.02682e-189	EC4	Mesenchymal
FAM124B	3.64032e-194	0.330054	0.284	0.08	1.33239e-189	EC1	Angiogenic
FERMT2	5.28688e-194	0.406131	0.862	0.623	1.93505e-189	EC4	Mesenchymal
AFF1	5.56858e-194	-0.45099	0.553	0.787	2.03816e-189	EC4	Mesenchymal
C16orf74	9.93869e-194	0.272145	0.398	0.154	3.63766e-189	EC2	Proliferative
CMIP	1.31747e-193	0.340488	0.873	0.761	4.82209e-189	EC1	Angiogenic
DOCK4	1.58727e-193	0.29235	0.977	0.856	5.80956e-189	EC2	Proliferative
FCHSD2	1.73336e-193	-0.440467	0.649	0.835	6.34428e-189	EC4	Mesenchymal
PTGS2	2.43348e-193	-0.544403	0.283	0.601	8.90678e-189	EC1	Angiogenic
SLC7A1	2.53624e-193	0.419625	0.644	0.305	9.2829e-189	EC4	Mesenchymal
CDH13	3.99676e-193	-0.408291	0.69	0.87	1.46285e-188	EC1	Angiogenic
EFNA5	4.3147e-193	0.383177	0.835	0.546	1.57922e-188	EC2	Proliferative
VWF	1.29903e-192	-0.658546	0.046	0.415	4.75456e-188	EC5	Procoagulatory
AC073529.1	3.3545e-192	0.253837	0.271	0.079	1.22778e-187	EC2	Proliferative
COL3A1	3.40236e-192	-0.567545	0.335	0.495	1.2453e-187	EC3	Activated mesenchymal-like
COL1A2	5.56968e-192	-0.576155	0.494	0.62	2.03856e-187	EC3	Activated mesenchymal-like
NBEA	6.10862e-192	-0.546919	0.263	0.618	2.23582e-187	EC4	Mesenchymal
ELK3	6.76142e-192	0.350071	0.819	0.703	2.47475e-187	EC1	Angiogenic
CCDC102B	7.02054e-192	0.442605	0.288	0.07	2.56959e-187	EC4	Mesenchymal
ACKR3	8.87904e-192	0.291955	0.361	0.164	3.24982e-187	EC3	Activated mesenchymal-like
PARD3B	1.30241e-191	0.302338	0.938	0.892	4.76694e-187	EC1	Angiogenic
FLNC	1.34104e-191	0.358483	0.486	0.177	4.90832e-187	EC4	Mesenchymal
PRKD1	1.65939e-191	0.491789	0.682	0.352	6.07353e-187	EC4	Mesenchymal
GPC6	1.67513e-191	-0.343755	0.012	0.148	6.13116e-187	EC3	Activated mesenchymal-like
TRIO	2.77431e-191	-0.297307	0.871	0.975	1.01543e-186	EC5	Procoagulatory
ALCAM	4.03625e-191	-0.480963	0.478	0.766	1.47731e-186	EC1	Angiogenic
NHSL1	7.94194e-191	-0.586857	0.358	0.682	2.90683e-186	EC4	Mesenchymal
ITGBL1	9.00138e-191	-0.543594	0.126	0.463	3.2946e-186	EC1	Angiogenic
P4HB	1.02726e-190	0.354242	0.928	0.717	3.75989e-186	EC4	Mesenchymal
AC083837.1	1.92325e-190	0.409555	0.486	0.274	7.03929e-186	EC3	Activated mesenchymal-like
IL6ST	1.94569e-190	0.26365	0.979	0.935	7.12141e-186	EC5	Procoagulatory
CXCL1	2.17263e-190	-0.505518	0.475	0.743	7.95203e-186	EC1	Angiogenic
PXDN	2.63039e-190	0.36467	0.905	0.713	9.62749e-186	EC4	Mesenchymal
SCN8A	3.82178e-190	0.332535	0.578	0.296	1.39881e-185	EC2	Proliferative
AC098588.3	5.85679e-190	0.364187	0.765	0.464	2.14364e-185	EC2	Proliferative
XRCC4	1.1671e-189	0.503547	0.66	0.353	4.27169e-185	EC4	Mesenchymal
RAPGEF5	2.16695e-189	-0.642415	0.145	0.522	7.93127e-185	EC4	Mesenchymal
PTPRE	2.91627e-189	-0.58839	0.224	0.595	1.06738e-184	EC4	Mesenchymal
MET	4.04384e-189	-0.550599	0.13	0.505	1.48008e-184	EC5	Procoagulatory
COL6A1	7.24509e-189	-0.354031	0.102	0.283	2.65178e-184	EC3	Activated mesenchymal-like
BCAT1	8.17997e-189	0.388955	0.921	0.681	2.99395e-184	EC4	Mesenchymal
POLA1	1.35932e-188	0.354188	0.512	0.254	4.97526e-184	EC2	Proliferative
CXCL8	2.94881e-188	-0.511718	0.497	0.749	1.07929e-183	EC1	Angiogenic
TPM1	6.21387e-188	-0.303622	0.859	0.902	2.27434e-183	EC2	Proliferative
NOP58	4.14624e-187	0.322395	0.648	0.373	1.51756e-182	EC2	Proliferative
LAMB1	1.05157e-186	-0.290978	0.887	0.953	3.84884e-182	EC4	Mesenchymal
SNRK	1.53225e-186	0.367687	0.877	0.702	5.60819e-182	EC1	Angiogenic
TCIM	1.97992e-186	0.272035	0.446	0.217	7.2467e-182	EC3	Activated mesenchymal-like
KDR	2.32157e-186	-0.580803	0.06	0.428	8.49716e-182	EC5	Procoagulatory
TNFSF4	7.83087e-186	0.313625	0.353	0.102	2.86618e-181	EC4	Mesenchymal
AC002074.1	9.60841e-186	0.260041	0.296	0.07	3.51677e-181	EC4	Mesenchymal
ENOX1	1.68211e-185	-0.542533	0.226	0.557	6.1567e-181	EC1	Angiogenic
PRNP	2.24417e-185	0.319006	0.427	0.144	8.21388e-181	EC4	Mesenchymal
PARD3B	3.24358e-185	-0.390726	0.744	0.919	1.18718e-180	EC5	Procoagulatory
IL6ST	9.29493e-185	-0.294688	0.908	0.943	3.40204e-180	EC4	Mesenchymal
PRICKLE1	1.04884e-184	-0.696625	0.099	0.47	3.83887e-180	EC4	Mesenchymal
PKM	1.41214e-184	0.349864	0.916	0.72	5.16856e-180	EC4	Mesenchymal
DOCK10	1.51006e-184	0.343411	0.702	0.413	5.52695e-180	EC2	Proliferative
PRIM2	2.6567e-184	0.342509	0.579	0.317	9.72377e-180	EC2	Proliferative
MGAT4A	7.67952e-184	0.318339	0.543	0.261	2.81078e-179	EC2	Proliferative
DDX10	7.86997e-184	0.327316	0.775	0.522	2.88049e-179	EC2	Proliferative
EBF1	2.19523e-183	0.397405	0.394	0.127	8.03475e-179	EC5	Procoagulatory
HSP90AB1	2.72504e-183	0.30524	0.96	0.84	9.97391e-179	EC4	Mesenchymal
MIS18BP1	2.74957e-183	0.3544	0.558	0.308	1.00637e-178	EC2	Proliferative
SLC44A5	4.04945e-183	-0.590763	0.046	0.421	1.48214e-178	EC4	Mesenchymal
MAST4	1.03174e-182	0.255391	0.902	0.772	3.77629e-178	EC3	Activated mesenchymal-like
DYSF	2.4017e-182	-0.62424	0.072	0.44	8.79046e-178	EC4	Mesenchymal
KIAA1211	4.2892e-182	0.435615	0.485	0.23	1.56989e-177	EC1	Angiogenic
PALMD	7.96686e-182	-0.577727	0.109	0.478	2.91595e-177	EC4	Mesenchymal
EDIL3	1.64716e-181	0.465961	0.758	0.382	6.02876e-177	EC4	Mesenchymal
ENOSF1	3.04582e-181	0.321462	0.665	0.392	1.1148e-176	EC2	Proliferative
ACTN1	3.2712e-181	0.327825	0.93	0.794	1.19729e-176	EC4	Mesenchymal
EXOC6	4.35035e-181	0.339105	0.885	0.676	1.59227e-176	EC2	Proliferative
FSTL3	7.53398e-181	0.326698	0.377	0.119	2.75751e-176	EC4	Mesenchymal
COL1A2	8.84609e-181	0.45896	0.795	0.536	3.23776e-176	EC5	Procoagulatory
MCTP1	1.0861e-180	-0.802683	0.085	0.453	3.97522e-176	EC4	Mesenchymal
EVI5	1.61818e-180	-0.327935	0.771	0.914	5.92268e-176	EC1	Angiogenic
LINC01776	1.69209e-180	0.289432	0.337	0.122	6.19323e-176	EC2	Proliferative
CFAP54	2.06257e-180	0.426353	0.8	0.587	7.5492e-176	EC1	Angiogenic
SHANK3	2.13034e-180	-0.538508	0.069	0.434	7.79726e-176	EC4	Mesenchymal
ARID5B	3.34556e-180	0.333383	0.591	0.394	1.22451e-175	EC3	Activated mesenchymal-like
GAS2L3	3.47447e-180	0.288385	0.315	0.11	1.27169e-175	EC2	Proliferative
HIF1A	9.09594e-180	0.382462	0.896	0.673	3.32921e-175	EC4	Mesenchymal
CUX1	1.52337e-179	0.317746	0.932	0.78	5.57567e-175	EC4	Mesenchymal
HMCN1	2.01801e-179	0.538516	0.786	0.528	7.38611e-175	EC5	Procoagulatory
SNCA	2.12198e-179	-0.5581	0.061	0.427	7.76667e-175	EC4	Mesenchymal
CPNE5	2.3737e-179	0.291443	0.25	0.066	8.68798e-175	EC1	Angiogenic
CTNNAL1	2.59088e-179	0.505103	0.687	0.437	9.48288e-175	EC5	Procoagulatory
PLD1	5.97448e-179	-0.551779	0.439	0.721	2.18672e-174	EC4	Mesenchymal
PHACTR1	1.31892e-178	0.350547	0.696	0.425	4.82739e-174	EC2	Proliferative
UCHL1	2.31338e-178	0.294548	0.334	0.095	8.46721e-174	EC4	Mesenchymal
HHIP	2.8528e-178	-0.36818	0.787	0.907	1.04415e-173	EC1	Angiogenic
AF117829.1	4.38736e-178	0.321776	0.69	0.525	1.60582e-173	EC3	Activated mesenchymal-like
P4HA1	4.84134e-178	0.408007	0.825	0.543	1.77198e-173	EC4	Mesenchymal
RPS6KA2	1.38803e-177	-0.441102	0.61	0.799	5.08033e-173	EC4	Mesenchymal
GATA6	1.77412e-177	-0.437273	0.234	0.578	6.49344e-173	EC1	Angiogenic
SMC2	2.17353e-177	0.253542	0.372	0.145	7.95534e-173	EC2	Proliferative
PID1	2.30277e-177	-0.333623	0.056	0.218	8.42836e-173	EC3	Activated mesenchymal-like
SCLT1	2.3598e-177	0.371195	0.711	0.484	8.63711e-173	EC2	Proliferative
FAP	2.36549e-177	0.429343	0.506	0.201	8.65793e-173	EC5	Procoagulatory
RFC3	2.99172e-177	0.254631	0.324	0.115	1.095e-172	EC2	Proliferative
DCLK2	3.74321e-177	0.471544	0.572	0.262	1.37005e-172	EC4	Mesenchymal
TNFAIP6	4.13401e-177	0.317834	0.344	0.099	1.51309e-172	EC4	Mesenchymal
MBOAT2	4.47781e-177	0.416141	0.534	0.22	1.63892e-172	EC4	Mesenchymal
AC005699.1	7.48249e-177	0.278892	0.331	0.118	2.73867e-172	EC2	Proliferative
ADAM19	8.61202e-177	0.404326	0.599	0.266	3.15209e-172	EC4	Mesenchymal
STK39	1.56654e-176	0.408022	0.726	0.392	5.73368e-172	EC4	Mesenchymal
RHOQ	3.0828e-176	0.358451	0.492	0.196	1.12834e-171	EC4	Mesenchymal
RERE	5.1247e-176	-0.33147	0.806	0.903	1.87569e-171	EC4	Mesenchymal
TLN1	5.50584e-176	0.375603	0.846	0.6	2.01519e-171	EC4	Mesenchymal
PRR5L	2.15432e-175	0.284004	0.343	0.099	7.88503e-171	EC4	Mesenchymal
AL356124.1	2.5994e-175	-0.621607	0.295	0.623	9.51405e-171	EC4	Mesenchymal
FRY	3.14143e-175	0.435981	0.465	0.181	1.14979e-170	EC4	Mesenchymal
RHOBTB3	5.0379e-175	-0.539769	0.251	0.606	1.84392e-170	EC5	Procoagulatory
IGFBP7	6.33147e-175	-0.295022	0.86	0.963	2.31738e-170	EC1	Angiogenic
DLC1	1.08135e-174	-0.372403	0.683	0.895	3.95786e-170	EC1	Angiogenic
MYH9	1.15878e-174	0.259685	0.98	0.891	4.24126e-170	EC4	Mesenchymal
EPB41L2	1.22174e-174	0.315328	0.815	0.583	4.4717e-170	EC2	Proliferative
TENM3	4.26731e-174	0.260728	0.313	0.11	1.56188e-169	EC2	Proliferative
PREX2	7.7851e-174	0.341694	0.694	0.373	2.84942e-169	EC2	Proliferative
PID1	8.29323e-174	0.480729	0.366	0.12	3.0354e-169	EC5	Procoagulatory
CLMP	1.4414e-173	-0.448793	0.069	0.376	5.27566e-169	EC1	Angiogenic
FARSB	2.60371e-173	0.286538	0.532	0.267	9.52983e-169	EC2	Proliferative
PRICKLE1	4.20658e-173	0.408025	0.645	0.377	1.53965e-168	EC2	Proliferative
BASP1	5.06176e-173	-0.428463	0.316	0.641	1.85265e-168	EC1	Angiogenic
MEIS1	5.4433e-173	0.496655	0.708	0.463	1.9923e-168	EC5	Procoagulatory
PBX1	5.88973e-173	0.48874	0.641	0.346	2.1557e-168	EC5	Procoagulatory
MEF2C	8.88238e-173	-0.326383	0.313	0.52	3.25104e-168	EC3	Activated mesenchymal-like
AC079148.3	1.05137e-172	0.270673	0.309	0.126	3.8481e-168	EC3	Activated mesenchymal-like
PIEZO2	1.32842e-172	0.529887	0.603	0.309	4.86217e-168	EC5	Procoagulatory
CECR2	1.39912e-172	-0.487357	0.035	0.393	5.12092e-168	EC4	Mesenchymal
UTRN	1.5469e-172	-0.277513	0.917	0.963	5.66181e-168	EC4	Mesenchymal
PDE7B	2.03088e-172	-0.573549	0.276	0.625	7.43323e-168	EC4	Mesenchymal
NRP1	2.09517e-172	-0.287477	0.64	0.805	7.66855e-168	EC3	Activated mesenchymal-like
COL3A1	3.15219e-172	-0.627254	0.249	0.47	1.15373e-167	EC2	Proliferative
NES	3.16203e-172	0.28086	0.444	0.201	1.15734e-167	EC2	Proliferative
KCNQ5	3.73566e-172	-0.451471	0.12	0.3	1.36729e-167	EC3	Activated mesenchymal-like
BICC1	5.03927e-172	0.457699	0.908	0.552	1.84442e-167	EC4	Mesenchymal
MAPRE2	1.27856e-171	-0.521382	0.273	0.597	4.67967e-167	EC4	Mesenchymal
CEP83	3.52437e-171	0.284438	0.499	0.245	1.28996e-166	EC2	Proliferative
PGF	6.31749e-171	0.478784	0.468	0.249	2.31226e-166	EC1	Angiogenic
MIR31HG	6.47504e-171	0.330785	0.904	0.707	2.36993e-166	EC2	Proliferative
VWF	6.62643e-171	-0.644462	0.056	0.411	2.42534e-166	EC4	Mesenchymal
AC092807.3	1.72908e-170	0.300154	0.349	0.108	6.32859e-166	EC4	Mesenchymal
ATF5	1.86624e-170	0.315167	0.34	0.103	6.83061e-166	EC4	Mesenchymal
DSP	3.82793e-170	-0.310271	0.034	0.176	1.40106e-165	EC3	Activated mesenchymal-like
CKAP4	4.53959e-170	-0.402458	0.399	0.713	1.66153e-165	EC1	Angiogenic
ERCC6	4.70128e-170	-0.421242	0.288	0.614	1.72072e-165	EC1	Angiogenic
MMS22L	4.76449e-170	0.323775	0.463	0.222	1.74385e-165	EC2	Proliferative
RAI14	6.47115e-170	-0.356254	0.752	0.915	2.36851e-165	EC5	Procoagulatory
IGF2BP3	7.32014e-170	-0.452932	0.556	0.78	2.67924e-165	EC4	Mesenchymal
BMX	8.36311e-170	-0.531533	0.075	0.427	3.06098e-165	EC4	Mesenchymal
IL1R1	8.61608e-170	0.521337	0.643	0.37	3.15357e-165	EC5	Procoagulatory
SLIT2	1.15042e-169	0.372626	0.806	0.581	4.21066e-165	EC2	Proliferative
BGN	1.40977e-169	-0.425494	0.339	0.567	5.15989e-165	EC2	Proliferative
ENAH	1.47955e-169	0.415669	0.849	0.627	5.41529e-165	EC4	Mesenchymal
MYO1E	1.77596e-169	-0.479888	0.431	0.747	6.5002e-165	EC5	Procoagulatory
CHST15	1.80228e-169	0.294044	0.247	0.068	6.59651e-165	EC1	Angiogenic
NEK7	2.32077e-169	0.266646	0.942	0.818	8.49426e-165	EC2	Proliferative
SPARC	2.73884e-169	-0.266371	0.883	0.9	1.00244e-164	EC2	Proliferative
TACC1	3.0858e-169	-0.472497	0.506	0.748	1.12943e-164	EC4	Mesenchymal
CCN2	4.73738e-169	0.352983	0.924	0.776	1.73393e-164	EC4	Mesenchymal
AXL	6.1476e-169	-0.394323	0.122	0.442	2.25008e-164	EC1	Angiogenic
DMD	7.73076e-169	0.502424	0.685	0.386	2.82954e-164	EC5	Procoagulatory
ZMYND8	7.85601e-169	-0.432359	0.504	0.743	2.87538e-164	EC4	Mesenchymal
ARNTL2	1.38008e-168	0.314613	0.602	0.331	5.05123e-164	EC2	Proliferative
EFEMP1	4.08034e-168	0.324046	0.978	0.863	1.49345e-163	EC5	Procoagulatory
PTPRB	7.92371e-168	0.299502	0.936	0.801	2.90016e-163	EC1	Angiogenic
PDE4B	1.29277e-167	-0.612453	0.116	0.469	4.73168e-163	EC4	Mesenchymal
DNMT1	1.39656e-167	0.276999	0.458	0.214	5.11155e-163	EC2	Proliferative
MOSMO	1.52496e-167	0.319026	0.713	0.471	5.58152e-163	EC2	Proliferative
FAF1	3.18404e-167	0.25484	0.906	0.776	1.16539e-162	EC2	Proliferative
PSD3	1.39582e-166	0.313097	0.838	0.611	5.10885e-162	EC2	Proliferative
DDAH1	1.64712e-166	-0.433323	0.467	0.76	6.02863e-162	EC1	Angiogenic
LRMDA	1.848e-166	0.324846	0.722	0.557	6.76386e-162	EC3	Activated mesenchymal-like
RAB3IP	3.39649e-166	0.28259	0.445	0.205	1.24315e-161	EC2	Proliferative
AL359208.1	6.7263e-166	0.304684	0.211	0.042	2.46189e-161	EC4	Mesenchymal
RIN2	1.28552e-165	-0.445089	0.649	0.809	4.70512e-161	EC4	Mesenchymal
SHANK3	2.24192e-165	0.401236	0.601	0.359	8.20567e-161	EC1	Angiogenic
MMP16	3.34012e-165	0.461917	0.781	0.438	1.22252e-160	EC4	Mesenchymal
MSC-AS1	5.17094e-165	-0.446878	0.054	0.285	1.89262e-160	EC2	Proliferative
DDAH1	5.34379e-165	0.419094	0.874	0.698	1.95588e-160	EC4	Mesenchymal
ATP8B1	5.59539e-165	0.366542	0.793	0.647	2.04797e-160	EC1	Angiogenic
PKIA	9.11176e-165	0.332218	0.605	0.334	3.335e-160	EC2	Proliferative
IGF2BP2	1.06741e-164	0.293162	0.9	0.735	3.90684e-160	EC2	Proliferative
ANKRD36C	1.74786e-164	0.333011	0.579	0.332	6.39734e-160	EC2	Proliferative
ABTB2	1.90372e-164	0.301808	0.298	0.08	6.96779e-160	EC4	Mesenchymal
ADAMTSL1	4.12604e-164	0.665394	0.599	0.35	1.51017e-159	EC5	Procoagulatory
PRCP	6.36025e-164	-0.49892	0.303	0.61	2.32791e-159	EC4	Mesenchymal
GRB10	7.53135e-164	-0.444563	0.519	0.802	2.75655e-159	EC5	Procoagulatory
LOXL2	1.11858e-163	0.381341	0.87	0.636	4.09412e-159	EC4	Mesenchymal
SEMA5A	1.35541e-163	-0.559279	0.273	0.5	4.96092e-159	EC2	Proliferative
SLC12A2	1.41472e-163	-0.566265	0.34	0.662	5.17802e-159	EC5	Procoagulatory
DGKI	1.60789e-163	0.375099	0.476	0.188	5.88503e-159	EC4	Mesenchymal
SHC3	3.94525e-163	-0.433837	0.131	0.439	1.444e-158	EC1	Angiogenic
GSTCD	5.6774e-163	0.274096	0.439	0.204	2.07798e-158	EC2	Proliferative
AC010737.1	8.72359e-163	0.411906	0.458	0.182	3.19292e-158	EC5	Procoagulatory
RNF149	1.3363e-162	0.316445	0.764	0.527	4.891e-158	EC2	Proliferative
KIAA1549L	2.49533e-162	-0.458746	0.313	0.619	9.13316e-158	EC1	Angiogenic
INHBA	3.76389e-162	-0.500802	0.174	0.479	1.37762e-157	EC1	Angiogenic
BMPER	6.22993e-162	0.644306	0.576	0.324	2.28022e-157	EC5	Procoagulatory
PAPSS2	6.83311e-162	-0.429175	0.43	0.719	2.50099e-157	EC1	Angiogenic
SDC2	9.40265e-162	-0.263654	0.04	0.181	3.44146e-157	EC3	Activated mesenchymal-like
CDCP1	2.83292e-161	0.295418	0.375	0.16	1.03688e-156	EC2	Proliferative
AL353138.1	3.03209e-161	0.410368	0.679	0.44	1.10977e-156	EC1	Angiogenic
CCN1	4.0795e-161	-0.400968	0.328	0.66	1.49314e-156	EC1	Angiogenic
KIAA1217	5.0512e-161	-0.598755	0.086	0.431	1.84879e-156	EC4	Mesenchymal
SLC38A1	5.67835e-161	0.402104	0.697	0.371	2.07833e-156	EC4	Mesenchymal
MBNL2	7.71394e-161	-0.382222	0.655	0.868	2.82338e-156	EC5	Procoagulatory
AC090791.1	1.09648e-160	0.33155	0.595	0.333	4.01324e-156	EC2	Proliferative
STARD13	2.99375e-160	0.288615	0.9	0.725	1.09574e-155	EC2	Proliferative
ARHGAP35	3.07214e-160	0.384867	0.744	0.446	1.12444e-155	EC4	Mesenchymal
MAST4	4.32099e-160	0.29143	0.884	0.818	1.58153e-155	EC1	Angiogenic
CDYL2	9.04545e-160	-0.481488	0.203	0.536	3.31073e-155	EC4	Mesenchymal
PDLIM5	1.30474e-159	-0.296661	0.812	0.94	4.77547e-155	EC1	Angiogenic
DEK	1.67077e-159	0.29858	0.603	0.346	6.11517e-155	EC2	Proliferative
RNF144B	2.11029e-159	0.336333	0.672	0.396	7.72386e-155	EC2	Proliferative
SASH1	2.28398e-159	0.337737	0.94	0.799	8.3596e-155	EC4	Mesenchymal
TTTY14	2.77049e-159	0.423939	0.562	0.27	1.01403e-154	EC5	Procoagulatory
ANO2	2.8187e-159	-0.601648	0.007	0.323	1.03167e-154	EC5	Procoagulatory
IGFBP7	3.12344e-159	0.250665	0.996	0.942	1.14321e-154	EC4	Mesenchymal
XKR6	3.74479e-159	-0.503291	0.158	0.505	1.37063e-154	EC4	Mesenchymal
MYH10	3.75127e-159	0.503028	0.798	0.563	1.373e-154	EC4	Mesenchymal
IL6	5.69172e-159	-0.457112	0.154	0.455	2.08323e-154	EC1	Angiogenic
TEK	6.13769e-159	0.302503	0.697	0.408	2.24645e-154	EC2	Proliferative
RCN3	6.62105e-159	0.366035	0.571	0.278	2.42337e-154	EC4	Mesenchymal
KCNMA1	6.98424e-159	0.288714	0.275	0.07	2.5563e-154	EC4	Mesenchymal
LOXL2	1.38972e-158	-0.404555	0.413	0.704	5.0865e-154	EC1	Angiogenic
EEF2	1.49184e-158	0.34795	0.861	0.641	5.46027e-154	EC4	Mesenchymal
SERPINE2	1.54288e-158	-0.463803	0.341	0.652	5.64708e-154	EC1	Angiogenic
OSMR-AS1	1.81035e-158	0.302017	0.364	0.122	6.62606e-154	EC4	Mesenchymal
GMDS	1.98159e-158	-0.467955	0.571	0.757	7.25284e-154	EC4	Mesenchymal
SEC14L1	2.93407e-158	-0.468743	0.416	0.662	1.0739e-153	EC4	Mesenchymal
UTY	4.9323e-158	0.418915	0.619	0.311	1.80527e-153	EC5	Procoagulatory
GCNT2	6.28434e-158	0.27631	0.249	0.064	2.30013e-153	EC5	Procoagulatory
ITGB8	6.55848e-158	0.36241	0.396	0.212	2.40047e-153	EC3	Activated mesenchymal-like
NCOA7	7.16783e-158	0.362384	0.845	0.704	2.6235e-153	EC5	Procoagulatory
TNFAIP3	8.90293e-158	-0.430145	0.142	0.445	3.25856e-153	EC1	Angiogenic
SAMD4A	1.56992e-157	0.25421	0.847	0.736	5.74607e-153	EC3	Activated mesenchymal-like
CD9	1.65596e-157	0.270039	0.924	0.736	6.06099e-153	EC2	Proliferative
UBE2H	2.08829e-157	-0.339968	0.733	0.854	7.64336e-153	EC4	Mesenchymal
IL1B	2.78084e-157	0.487776	0.557	0.27	1.01782e-152	EC4	Mesenchymal
DAPK1	3.24452e-157	-0.480782	0.344	0.67	1.18753e-152	EC5	Procoagulatory
RPS6KA2	3.90166e-157	-0.429577	0.537	0.811	1.42805e-152	EC5	Procoagulatory
PLCB1	1.06381e-156	0.350402	0.834	0.744	3.89366e-152	EC1	Angiogenic
THSD7A	1.06801e-156	-0.608587	0.111	0.446	3.90903e-152	EC5	Procoagulatory
CASC15	1.1804e-156	0.298538	0.801	0.666	4.3204e-152	EC3	Activated mesenchymal-like
LRIG3	1.46784e-156	-0.536704	0.112	0.447	5.37243e-152	EC4	Mesenchymal
TBC1D2B	1.50165e-156	0.377322	0.624	0.322	5.49619e-152	EC4	Mesenchymal
LGMN	2.27463e-156	0.296008	0.408	0.149	8.32537e-152	EC4	Mesenchymal
ANKRD28	2.50493e-156	0.3119	0.751	0.495	9.16828e-152	EC2	Proliferative
C1orf21	3.81604e-156	0.360416	0.653	0.411	1.39671e-151	EC2	Proliferative
DOCK5	5.31788e-156	0.425726	0.792	0.499	1.9464e-151	EC4	Mesenchymal
NR2F1-AS1	5.74303e-156	-0.414757	0.336	0.653	2.10201e-151	EC1	Angiogenic
SAT1	1.24427e-155	-0.455521	0.531	0.779	4.55415e-151	EC1	Angiogenic
AC023282.1	1.60914e-155	0.251181	0.363	0.15	5.88962e-151	EC2	Proliferative
LRBA	2.04255e-155	-0.382931	0.615	0.801	7.47593e-151	EC4	Mesenchymal
STARD4-AS1	2.45786e-155	0.363858	0.471	0.198	8.996e-151	EC4	Mesenchymal
GEN1	2.66258e-155	0.295625	0.487	0.256	9.7453e-151	EC2	Proliferative
ZFPM2	3.37769e-155	-0.311008	0.877	0.965	1.23627e-150	EC4	Mesenchymal
PPP1R16B	3.6056e-155	-0.567477	0.03	0.357	1.31968e-150	EC4	Mesenchymal
ENO1	4.71315e-155	0.329646	0.907	0.706	1.72506e-150	EC4	Mesenchymal
TTLL5	5.07914e-155	0.299119	0.747	0.503	1.85902e-150	EC2	Proliferative
SLC38A1	7.44711e-155	0.316875	0.608	0.356	2.72572e-150	EC2	Proliferative
CLDN11	8.21764e-155	0.37022	0.279	0.084	3.00774e-150	EC5	Procoagulatory
SPATA5	1.17231e-154	0.317696	0.701	0.477	4.29079e-150	EC2	Proliferative
GJA1	1.4953e-154	-0.380088	0.405	0.706	5.47296e-150	EC1	Angiogenic
FBLN2	1.81519e-154	-0.253037	0.057	0.202	6.64377e-150	EC3	Activated mesenchymal-like
CD44	2.81723e-154	0.378315	0.92	0.667	1.03114e-149	EC4	Mesenchymal
BDNF	3.85978e-154	-0.440001	0.07	0.352	1.41272e-149	EC1	Angiogenic
MDN1	7.04344e-154	0.287585	0.617	0.36	2.57797e-149	EC2	Proliferative
PELI1	1.39029e-153	-0.483455	0.224	0.544	5.08858e-149	EC4	Mesenchymal
C12orf75	1.48746e-153	0.365172	0.511	0.228	5.44426e-149	EC4	Mesenchymal
TSPAN5	1.69781e-153	0.301845	0.852	0.611	6.21417e-149	EC2	Proliferative
PIR	2.28286e-153	0.484766	0.579	0.377	8.35551e-149	EC1	Angiogenic
PGAP1	3.11426e-153	0.300516	0.612	0.35	1.13985e-148	EC2	Proliferative
PDLIM2	3.14034e-153	0.267982	0.355	0.114	1.1494e-148	EC4	Mesenchymal
SEPTIN9	3.50483e-153	0.360223	0.634	0.307	1.2828e-148	EC4	Mesenchymal
FUT8	5.21523e-153	-0.408819	0.504	0.759	1.90883e-148	EC1	Angiogenic
KLF9	5.4112e-153	0.34035	0.474	0.2	1.98055e-148	EC4	Mesenchymal
CDC14B	8.25702e-153	0.251448	0.315	0.093	3.02215e-148	EC4	Mesenchymal
LRRFIP2	8.51026e-153	0.26663	0.873	0.695	3.11484e-148	EC2	Proliferative
AC013652.1	1.36315e-152	-0.579081	0.376	0.668	4.98927e-148	EC4	Mesenchymal
COL1A2	1.98714e-152	-0.599972	0.443	0.597	7.27313e-148	EC2	Proliferative
MT2A	6.02092e-152	0.364486	0.775	0.576	2.20372e-147	EC2	Proliferative
VCL	6.509e-152	0.336047	0.915	0.718	2.38236e-147	EC4	Mesenchymal
NHSL2	8.232e-152	0.370303	0.401	0.185	3.01299e-147	EC1	Angiogenic
GRAMD2B	9.25887e-152	0.259246	0.312	0.092	3.38884e-147	EC4	Mesenchymal
USP9Y	1.96162e-151	0.401651	0.596	0.298	7.17972e-147	EC5	Procoagulatory
CXCR4	2.45081e-151	0.264865	0.213	0.056	8.97021e-147	EC1	Angiogenic
MMP16	4.93719e-151	-0.517332	0.162	0.515	1.80706e-146	EC5	Procoagulatory
SLC12A2	6.13224e-151	-0.571529	0.408	0.651	2.24446e-146	EC4	Mesenchymal
CCNY	7.08842e-151	-0.291921	0.787	0.874	2.59443e-146	EC4	Mesenchymal
NIBAN1	7.20698e-151	0.364908	0.47	0.193	2.63783e-146	EC4	Mesenchymal
GPR176	9.59443e-151	-0.407525	0.203	0.518	3.51166e-146	EC1	Angiogenic
RNF121	1.15059e-150	0.296927	0.736	0.493	4.21126e-146	EC2	Proliferative
XYLT1	1.33884e-150	-0.32716	0.1	0.259	4.90027e-146	EC3	Activated mesenchymal-like
TNPO1	1.36387e-150	-0.338158	0.739	0.901	4.99191e-146	EC5	Procoagulatory
CHN1	1.90476e-150	-0.495189	0.152	0.482	6.97162e-146	EC4	Mesenchymal
KDR	5.3939e-150	-0.55619	0.098	0.42	1.97422e-145	EC4	Mesenchymal
AC105402.3	6.62829e-150	0.325352	0.139	0.026	2.42602e-145	EC2	Proliferative
TNPO1	9.01383e-150	-0.287573	0.858	0.886	3.29915e-145	EC4	Mesenchymal
MAP3K5	1.67049e-149	-0.413405	0.278	0.597	6.11415e-145	EC1	Angiogenic
CMIP	2.28267e-149	-0.408636	0.527	0.81	8.35479e-145	EC5	Procoagulatory
EGFR	4.3124e-149	0.411532	0.743	0.443	1.57838e-144	EC4	Mesenchymal
GLCE	4.79238e-149	-0.484052	0.252	0.56	1.75406e-144	EC4	Mesenchymal
RNF121	5.13888e-149	-0.38701	0.285	0.586	1.88088e-144	EC1	Angiogenic
PALLD	8.24397e-149	-0.568438	0.144	0.464	3.01738e-144	EC5	Procoagulatory
FNBP1L	9.92086e-149	0.36942	0.703	0.515	3.63113e-144	EC1	Angiogenic
GASK1B	1.05731e-148	0.421658	0.508	0.29	3.86987e-144	EC1	Angiogenic
MMRN1	2.88668e-148	-0.512435	0.1	0.42	1.05655e-143	EC5	Procoagulatory
ARSJ	3.49775e-148	-0.410115	0.361	0.671	1.28021e-143	EC1	Angiogenic
MMP1	3.80189e-148	0.318213	0.877	0.665	1.39153e-143	EC2	Proliferative
ST6GALNAC3	4.91893e-148	-0.61597	0.274	0.583	1.80038e-143	EC4	Mesenchymal
PRKY	6.30797e-148	0.440522	0.569	0.293	2.30878e-143	EC5	Procoagulatory
TIMP3	8.0278e-148	-0.368931	0.046	0.18	2.93826e-143	EC3	Activated mesenchymal-like
CFAP54	8.35147e-148	0.331922	0.826	0.567	3.05672e-143	EC2	Proliferative
ARSJ	8.7502e-148	0.304494	0.81	0.579	3.20266e-143	EC2	Proliferative
HMGA2	1.83216e-147	-0.542558	0.356	0.617	6.7059e-143	EC1	Angiogenic
FKBP5	4.2554e-147	0.260418	0.44	0.205	1.55752e-142	EC2	Proliferative
OSBPL3	1.352e-146	-0.497942	0.335	0.616	4.94847e-142	EC4	Mesenchymal
SH3RF1	1.85975e-146	0.335978	0.915	0.735	6.80685e-142	EC4	Mesenchymal
TRERF1	1.97316e-146	0.313985	0.397	0.141	7.22196e-142	EC4	Mesenchymal
CTNNB1	2.24102e-146	0.287555	0.8	0.718	8.20238e-142	EC1	Angiogenic
ZDHHC14	3.05501e-146	-0.475975	0.258	0.566	1.11816e-141	EC4	Mesenchymal
CSF3	5.67599e-146	0.29254	0.412	0.23	2.07747e-141	EC3	Activated mesenchymal-like
FOSL1	7.40913e-146	0.263223	0.448	0.219	2.71182e-141	EC2	Proliferative
MYCT1	7.68663e-146	0.290026	0.706	0.458	2.81338e-141	EC2	Proliferative
ADAMTS9	9.68717e-146	-0.729579	0.116	0.423	3.5456e-141	EC4	Mesenchymal
SH2D3C	9.73701e-146	0.332584	0.36	0.154	3.56384e-141	EC1	Angiogenic
KCNN3	1.14771e-145	0.320258	0.252	0.08	4.20074e-141	EC1	Angiogenic
OSBPL3	1.37733e-145	0.296231	0.804	0.532	5.04118e-141	EC2	Proliferative
CDKAL1	2.30646e-145	0.254208	0.874	0.714	8.44187e-141	EC2	Proliferative
IARS	3.39207e-145	0.372179	0.79	0.506	1.24153e-140	EC4	Mesenchymal
KANK1	3.9172e-145	-0.402221	0.221	0.528	1.43373e-140	EC1	Angiogenic
AL008633.1	9.99258e-145	-0.390013	0.119	0.348	3.65738e-140	EC2	Proliferative
DISC1	1.05865e-144	0.380514	0.621	0.436	3.87476e-140	EC1	Angiogenic
PLAGL1	1.88157e-144	0.376296	0.646	0.343	6.88673e-140	EC4	Mesenchymal
MAN2A1	4.37359e-144	-0.462779	0.293	0.61	1.60078e-139	EC5	Procoagulatory
MGAT4A	1.03888e-143	-0.458953	0.038	0.35	3.80241e-139	EC4	Mesenchymal
RASSF3	1.07951e-143	0.293132	0.76	0.521	3.95111e-139	EC2	Proliferative
BACE2	1.26068e-143	-0.465445	0.352	0.625	4.6142e-139	EC4	Mesenchymal
SYNE1	1.29223e-143	0.371565	0.869	0.635	4.72968e-139	EC4	Mesenchymal
DPF3	2.54393e-143	0.279775	0.585	0.321	9.31105e-139	EC2	Proliferative
STC2	3.24429e-143	-0.394289	0.104	0.383	1.18744e-138	EC1	Angiogenic
EPHA4	3.35557e-143	0.40197	0.562	0.343	1.22817e-138	EC1	Angiogenic
KCNS3	3.91713e-143	-0.393401	0.102	0.383	1.43371e-138	EC1	Angiogenic
RASSF3	7.37861e-143	-0.46001	0.318	0.598	2.70065e-138	EC4	Mesenchymal
NUDT4	1.12332e-142	0.272446	0.711	0.55	4.11145e-138	EC3	Activated mesenchymal-like
DOCK6	1.62861e-142	-0.444687	0.158	0.474	5.96089e-138	EC4	Mesenchymal
MYRIP	4.18979e-142	0.474831	0.576	0.35	1.5335e-137	EC1	Angiogenic
SNED1	5.76012e-142	0.395451	0.549	0.33	2.10826e-137	EC1	Angiogenic
SP100	6.21521e-142	-0.280251	0.826	0.879	2.27483e-137	EC4	Mesenchymal
NRCAM	6.64219e-142	-0.548543	0.474	0.695	2.43111e-137	EC5	Procoagulatory
SHE	7.00462e-142	0.348083	0.401	0.191	2.56376e-137	EC1	Angiogenic
PLXNA4	8.09371e-142	-0.537554	0.186	0.53	2.96238e-137	EC5	Procoagulatory
STAT1	1.46711e-141	0.329424	0.607	0.456	5.36975e-137	EC3	Activated mesenchymal-like
CGNL1	1.7336e-141	-0.510686	0.219	0.528	6.34514e-137	EC4	Mesenchymal
ITGA4	2.35272e-141	0.251993	0.287	0.084	8.61119e-137	EC4	Mesenchymal
LATS2	2.41139e-141	0.291438	0.756	0.546	8.82592e-137	EC2	Proliferative
ARHGAP22	2.56593e-141	0.279682	0.842	0.626	9.39154e-137	EC2	Proliferative
FAR2	3.29924e-141	0.365334	0.737	0.581	1.20756e-136	EC1	Angiogenic
MGLL	1.04773e-140	0.2662	0.442	0.222	3.83479e-136	EC2	Proliferative
TRIM24	1.45483e-140	0.28925	0.613	0.448	5.32484e-136	EC3	Activated mesenchymal-like
PLEKHG1	1.75394e-140	-0.532423	0.123	0.431	6.4196e-136	EC4	Mesenchymal
PDIA3	3.0034e-140	0.298077	0.914	0.74	1.09928e-135	EC4	Mesenchymal
NEXN	3.45533e-140	0.38418	0.66	0.372	1.26468e-135	EC4	Mesenchymal
GPRC5A	4.06524e-140	0.286386	0.399	0.23	1.48792e-135	EC3	Activated mesenchymal-like
EDIL3	5.83234e-140	-0.483122	0.183	0.463	2.13469e-135	EC1	Angiogenic
ADAMTS1	5.97716e-140	0.278387	0.526	0.276	2.1877e-135	EC2	Proliferative
EGFR	7.36198e-140	-0.398559	0.218	0.519	2.69456e-135	EC1	Angiogenic
GPRC5A	7.46549e-140	-0.375784	0.074	0.342	2.73244e-135	EC1	Angiogenic
ARHGAP28	7.86452e-140	0.338949	0.273	0.096	2.87849e-135	EC1	Angiogenic
KLHL4	1.50427e-139	-0.47475	0.047	0.357	5.50578e-135	EC4	Mesenchymal
SH3RF1	2.02133e-139	0.270152	0.9	0.718	7.39828e-135	EC2	Proliferative
UGDH	2.08261e-139	0.335304	0.53	0.247	7.62254e-135	EC4	Mesenchymal
BCAR3	2.72674e-139	-0.405881	0.515	0.733	9.98014e-135	EC4	Mesenchymal
CEP192	3.23037e-139	0.28817	0.668	0.439	1.18235e-134	EC2	Proliferative
TBC1D4	3.39754e-139	-0.502366	0.307	0.582	1.24353e-134	EC4	Mesenchymal
NCEH1	4.31983e-139	0.275139	0.583	0.331	1.5811e-134	EC2	Proliferative
SH3RF2	4.54461e-139	0.292631	0.348	0.181	1.66337e-134	EC3	Activated mesenchymal-like
WDR43	7.51385e-139	0.2807	0.691	0.452	2.75014e-134	EC2	Proliferative
ENOX1	1.11918e-138	-0.569455	0.25	0.539	4.0963e-134	EC4	Mesenchymal
SLIT2	1.48251e-138	-0.291002	0.539	0.691	5.42615e-134	EC3	Activated mesenchymal-like
CKAP5	1.54311e-138	0.297324	0.583	0.359	5.64795e-134	EC2	Proliferative
SYT1	1.57616e-138	-0.540421	0.048	0.341	5.76891e-134	EC5	Procoagulatory
CSE1L	1.59215e-138	0.253978	0.505	0.268	5.82742e-134	EC2	Proliferative
SPRED2	1.85718e-138	0.354231	0.542	0.266	6.79746e-134	EC4	Mesenchymal
NR3C2	2.78446e-138	0.311864	0.55	0.3	1.01914e-133	EC2	Proliferative
NR5A2	2.95012e-138	-0.485581	0.014	0.298	1.07977e-133	EC5	Procoagulatory
PLOD1	3.4734e-138	0.345076	0.67	0.384	1.2713e-133	EC4	Mesenchymal
ABLIM1	3.59368e-138	-0.529113	0.259	0.548	1.31532e-133	EC4	Mesenchymal
GDPD5	4.94346e-138	0.283986	0.268	0.094	1.80936e-133	EC1	Angiogenic
BMX	5.91174e-138	0.377227	0.575	0.357	2.16376e-133	EC1	Angiogenic
SOD2	5.9455e-138	0.283598	0.696	0.543	2.17611e-133	EC3	Activated mesenchymal-like
ESM1	6.05615e-138	0.301978	0.67	0.413	2.21661e-133	EC2	Proliferative
PREX1	7.69469e-138	-0.42615	0.113	0.429	2.81633e-133	EC4	Mesenchymal
ABCA9	1.26004e-137	-0.431424	0.19	0.41	4.61188e-133	EC2	Proliferative
TEK	1.31475e-137	-0.477555	0.19	0.498	4.81213e-133	EC4	Mesenchymal
TNFRSF21	1.52418e-137	0.251712	0.42	0.234	5.57867e-133	EC3	Activated mesenchymal-like
OSBPL10	1.65316e-137	0.411009	0.515	0.311	6.05075e-133	EC1	Angiogenic
UAP1	1.77727e-137	-0.364152	0.189	0.478	6.505e-133	EC1	Angiogenic
ENTPD1	2.22539e-137	0.276397	0.178	0.044	8.14513e-133	EC1	Angiogenic
NR2F1	2.59101e-137	0.254597	0.481	0.245	9.48336e-133	EC2	Proliferative
SWAP70	2.80335e-137	-0.371157	0.569	0.75	1.02605e-132	EC4	Mesenchymal
IGFBP5	6.67797e-137	0.473447	0.444	0.196	2.4442e-132	EC5	Procoagulatory
HEG1	7.5481e-137	0.375566	0.883	0.63	2.76268e-132	EC4	Mesenchymal
DPF3	1.01061e-136	-0.450454	0.095	0.406	3.69895e-132	EC4	Mesenchymal
COL5A1	1.13609e-136	-0.363805	0.552	0.67	4.1582e-132	EC2	Proliferative
ECSCR	1.24016e-136	-0.414223	0.188	0.5	4.53912e-132	EC4	Mesenchymal
DPYD	1.61174e-136	-0.295437	0.769	0.913	5.89915e-132	EC1	Angiogenic
BICC1	2.3944e-136	0.324513	0.662	0.534	8.76376e-132	EC3	Activated mesenchymal-like
FAM241A	2.6596e-136	0.28667	0.577	0.335	9.7344e-132	EC2	Proliferative
MGP	4.79549e-136	0.511172	0.537	0.314	1.7552e-131	EC5	Procoagulatory
LGALS3BP	7.05784e-136	0.259855	0.264	0.08	2.58324e-131	EC5	Procoagulatory
CDH2	9.34774e-136	0.361831	0.944	0.701	3.42137e-131	EC4	Mesenchymal
PLA2R1	1.04425e-135	-0.485518	0.235	0.528	3.82208e-131	EC4	Mesenchymal
SWAP70	1.30554e-135	-0.382272	0.484	0.763	4.77839e-131	EC5	Procoagulatory
FHIT	1.31519e-135	-0.514298	0.152	0.461	4.81371e-131	EC4	Mesenchymal
CARD8	1.39678e-135	-0.429879	0.248	0.565	5.11234e-131	EC5	Procoagulatory
ITPR2	1.40362e-135	-0.297333	0.841	0.891	5.13739e-131	EC4	Mesenchymal
CLTCL1	1.76317e-135	0.292127	0.361	0.133	6.45338e-131	EC4	Mesenchymal
DOCK10	1.89552e-135	-0.445361	0.188	0.507	6.93779e-131	EC5	Procoagulatory
MT-ND4L	2.3137e-135	-0.262561	0.75	0.886	8.46837e-131	EC1	Angiogenic
TM4SF1	2.70656e-135	-0.424501	0.316	0.596	9.90626e-131	EC4	Mesenchymal
ZFHX4	3.10695e-135	0.353313	0.581	0.268	1.13718e-130	EC4	Mesenchymal
MAP1B	3.84358e-135	-0.30737	0.696	0.88	1.40679e-130	EC1	Angiogenic
COL5A1	4.02972e-135	-0.413405	0.432	0.684	1.47492e-130	EC1	Angiogenic
KRT7	5.49901e-135	0.402419	0.628	0.345	2.01269e-130	EC4	Mesenchymal
INSYN2B	6.49399e-135	-0.509486	0.102	0.41	2.37686e-130	EC4	Mesenchymal
TEAD1	7.22466e-135	0.2971	0.928	0.779	2.6443e-130	EC4	Mesenchymal
SCFD2	7.88698e-135	0.284316	0.779	0.566	2.88671e-130	EC2	Proliferative
PTPRM	1.00445e-134	0.276404	0.945	0.879	3.67638e-130	EC5	Procoagulatory
NAV1	1.04356e-134	-0.332168	0.612	0.825	3.81953e-130	EC1	Angiogenic
TIE1	1.16062e-134	0.325613	0.706	0.545	4.24799e-130	EC1	Angiogenic
ECE1	1.47232e-134	-0.270437	0.811	0.891	5.38882e-130	EC4	Mesenchymal
ANO2	1.59543e-134	-0.5772	0.023	0.318	5.83944e-130	EC4	Mesenchymal
DDX21	2.05214e-134	0.27602	0.681	0.442	7.51105e-130	EC2	Proliferative
ETV6	2.81446e-134	-0.312545	0.76	0.879	1.03012e-129	EC4	Mesenchymal
MCTP1	3.40473e-134	0.433461	0.506	0.344	1.24617e-129	EC3	Activated mesenchymal-like
ATP13A3	9.06304e-134	0.32598	0.973	0.788	3.31716e-129	EC4	Mesenchymal
ADCY4	1.05698e-133	-0.409042	0.031	0.329	3.86865e-129	EC4	Mesenchymal
ADGRL4	1.20549e-133	0.259138	0.895	0.721	4.41221e-129	EC2	Proliferative
ADCY4	1.22327e-133	0.361047	0.48	0.265	4.47728e-129	EC1	Angiogenic
NTM	1.36597e-133	0.367199	0.455	0.196	4.99957e-129	EC4	Mesenchymal
RALGAPA2	1.57429e-133	0.362978	0.762	0.616	5.76208e-129	EC1	Angiogenic
TAGLN	2.33608e-133	-0.373078	0.437	0.624	8.5503e-129	EC2	Proliferative
CFLAR	2.39994e-133	-0.333068	0.635	0.791	8.78403e-129	EC4	Mesenchymal
AC090791.1	2.40701e-133	-0.392681	0.147	0.426	8.80988e-129	EC1	Angiogenic
DMD	3.92018e-133	0.464356	0.669	0.39	1.43483e-128	EC4	Mesenchymal
LDLRAD3	5.09865e-133	0.274408	0.696	0.435	1.86616e-128	EC2	Proliferative
XPO1	5.5711e-133	0.265356	0.791	0.584	2.03908e-128	EC2	Proliferative
TOX	6.18926e-133	-0.575686	0.088	0.394	2.26533e-128	EC4	Mesenchymal
LPCAT2	6.86917e-133	-0.468647	0.285	0.572	2.51419e-128	EC4	Mesenchymal
EFEMP2	7.03847e-133	0.266021	0.389	0.147	2.57615e-128	EC4	Mesenchymal
SSH1	7.23509e-133	-0.257154	0.701	0.793	2.64812e-128	EC2	Proliferative
NUAK1	7.29908e-133	0.282371	0.527	0.353	2.67153e-128	EC3	Activated mesenchymal-like
KLF7	7.94055e-133	-0.359955	0.508	0.764	2.90632e-128	EC1	Angiogenic
PLXDC2	9.24364e-133	0.442334	0.286	0.096	3.38326e-128	EC5	Procoagulatory
ARHGEF28	1.05788e-132	0.323432	0.8	0.718	3.87195e-128	EC1	Angiogenic
COBLL1	1.06469e-132	-0.45493	0.262	0.571	3.89686e-128	EC5	Procoagulatory
PIR	2.99622e-132	-0.498816	0.136	0.439	1.09665e-127	EC4	Mesenchymal
TENT5A	3.36198e-132	0.262849	0.326	0.11	1.23052e-127	EC4	Mesenchymal
SNCAIP	8.44032e-132	0.29977	0.231	0.073	3.08924e-127	EC1	Angiogenic
BDNF	1.64355e-131	0.452837	0.523	0.283	6.01556e-127	EC5	Procoagulatory
GULP1	2.64695e-131	-0.466022	0.162	0.483	9.68811e-127	EC5	Procoagulatory
ZDHHC21	2.76199e-131	-0.387166	0.547	0.732	1.01091e-126	EC4	Mesenchymal
COL5A2	2.99143e-131	-0.271162	0.754	0.814	1.09489e-126	EC2	Proliferative
ARID5B	3.62026e-131	-0.416588	0.24	0.521	1.32505e-126	EC1	Angiogenic
AC007513.1	4.00423e-131	-0.382531	0.032	0.326	1.46559e-126	EC4	Mesenchymal
IGFBP3	4.53046e-131	-0.473258	0.212	0.411	1.65819e-126	EC2	Proliferative
NR3C2	6.80174e-131	-0.494221	0.081	0.382	2.48951e-126	EC4	Mesenchymal
PUM3	7.20069e-131	0.275605	0.724	0.492	2.63552e-126	EC2	Proliferative
AC090791.1	1.03352e-130	-0.466549	0.112	0.417	3.78279e-126	EC4	Mesenchymal
SPATS2	1.20436e-130	-0.283401	0.758	0.861	4.40808e-126	EC4	Mesenchymal
KANK3	3.83529e-130	0.26984	0.244	0.083	1.40376e-125	EC1	Angiogenic
AC013652.1	8.85853e-130	-0.495167	0.357	0.673	3.24231e-125	EC5	Procoagulatory
CD63	1.15419e-129	0.285025	0.909	0.765	4.22444e-125	EC4	Mesenchymal
SLC16A3	1.41059e-129	0.313921	0.55	0.277	5.16291e-125	EC4	Mesenchymal
TNS3	1.4778e-129	-0.342468	0.45	0.614	5.4089e-125	EC2	Proliferative
KCNQ5	1.63242e-129	-0.527846	0.027	0.256	5.97481e-125	EC1	Angiogenic
CFH	1.82941e-129	0.449602	0.651	0.439	6.69584e-125	EC5	Procoagulatory
SEMA5A	2.19081e-129	0.488266	0.69	0.425	8.01859e-125	EC5	Procoagulatory
AKAP12	2.24393e-129	0.387014	0.833	0.57	8.21302e-125	EC4	Mesenchymal
PALMD	2.49212e-129	0.26686	0.545	0.358	9.12141e-125	EC3	Activated mesenchymal-like
ITGA10	2.53251e-129	0.345046	0.365	0.168	9.26925e-125	EC1	Angiogenic
SMAD3	4.40244e-129	-0.310571	0.66	0.878	1.61134e-124	EC1	Angiogenic
EHD4	9.42053e-129	0.261868	0.68	0.422	3.44801e-124	EC2	Proliferative
SSR3	1.0369e-128	0.331656	0.794	0.548	3.79516e-124	EC4	Mesenchymal
COL1A1	1.83803e-128	-0.633593	0.281	0.421	6.72739e-124	EC3	Activated mesenchymal-like
FAP	1.8726e-128	-0.282936	0.144	0.305	6.85391e-124	EC3	Activated mesenchymal-like
DNMBP	2.2496e-128	0.266821	0.791	0.585	8.23376e-124	EC2	Proliferative
SH3PXD2A	2.56323e-128	0.325307	0.484	0.217	9.38166e-124	EC4	Mesenchymal
CXCL6	3.03724e-128	0.272847	0.71	0.548	1.11166e-123	EC3	Activated mesenchymal-like
ABCA8	3.11505e-128	-0.474231	0.184	0.487	1.14014e-123	EC4	Mesenchymal
DTNA	3.65942e-128	0.308365	0.53	0.297	1.33938e-123	EC2	Proliferative
DPF3	4.2039e-128	-0.413105	0.109	0.407	1.53867e-123	EC5	Procoagulatory
CPQ	4.28632e-128	0.362563	0.658	0.367	1.56883e-123	EC4	Mesenchymal
MMRN1	6.23506e-128	0.296359	0.581	0.334	2.2821e-123	EC2	Proliferative
FAT4	6.99619e-128	0.396996	0.605	0.417	2.56067e-123	EC1	Angiogenic
QSOX1	1.09338e-127	0.346387	0.71	0.447	4.00187e-123	EC4	Mesenchymal
NEGR1	1.35904e-127	0.315566	0.792	0.576	4.97423e-123	EC2	Proliferative
BACH1	1.38441e-127	-0.378242	0.397	0.667	5.06709e-123	EC1	Angiogenic
RHOBTB3	2.15486e-127	0.269192	0.657	0.496	7.88701e-123	EC3	Activated mesenchymal-like
INPP5D	2.51834e-127	0.349288	0.433	0.231	9.21738e-123	EC1	Angiogenic
ABI3BP	4.16186e-127	0.467627	0.843	0.619	1.52328e-122	EC4	Mesenchymal
LRPPRC	6.23262e-127	0.264103	0.748	0.526	2.2812e-122	EC2	Proliferative
PAPPA	6.31795e-127	-0.564549	0.198	0.404	2.31243e-122	EC2	Proliferative
PGK1	7.2949e-127	0.340345	0.702	0.446	2.67001e-122	EC4	Mesenchymal
CDK6	7.78263e-127	-0.404459	0.52	0.76	2.84852e-122	EC5	Procoagulatory
IRAK3	9.61298e-127	-0.382987	0.143	0.412	3.51845e-122	EC1	Angiogenic
SEMA3A	1.02493e-126	0.44987	0.537	0.291	3.75136e-122	EC5	Procoagulatory
BGN	1.03313e-126	0.389562	0.727	0.495	3.78136e-122	EC5	Procoagulatory
CDK14	1.132e-126	-0.322618	0.627	0.844	4.14325e-122	EC1	Angiogenic
PKIA	1.33457e-126	-0.463245	0.122	0.419	4.88464e-122	EC4	Mesenchymal
TCERG1	1.56904e-126	0.252664	0.774	0.567	5.74285e-122	EC2	Proliferative
FST	1.68595e-126	0.285669	0.4	0.198	6.17075e-122	EC2	Proliferative
RIN2	1.75245e-126	0.276764	0.847	0.783	6.41414e-122	EC1	Angiogenic
HECW2	2.10379e-126	0.282443	0.832	0.61	7.70006e-122	EC2	Proliferative
GPX8	2.40514e-126	0.301991	0.503	0.235	8.80306e-122	EC4	Mesenchymal
MBNL2	4.79029e-126	-0.315198	0.756	0.855	1.75329e-121	EC4	Mesenchymal
HIF1A-AS3	5.1808e-126	0.366056	0.639	0.33	1.89623e-121	EC4	Mesenchymal
PRCP	8.04975e-126	0.340311	0.694	0.557	2.94629e-121	EC1	Angiogenic
EPB41	8.36019e-126	-0.415296	0.193	0.492	3.05991e-121	EC4	Mesenchymal
KCNT2	8.51509e-126	0.496608	0.451	0.225	3.11661e-121	EC5	Procoagulatory
AFDN	9.32219e-126	-0.387932	0.434	0.674	3.41202e-121	EC4	Mesenchymal
NCOA7	1.05669e-125	-0.348687	0.496	0.759	3.8676e-121	EC1	Angiogenic
COL8A1	1.15772e-125	-0.575478	0.512	0.726	4.23738e-121	EC4	Mesenchymal
ZFHX4	3.16542e-125	-0.4356	0.055	0.333	1.15858e-120	EC5	Procoagulatory
TSPAN9	3.99986e-125	-0.418846	0.279	0.556	1.46399e-120	EC4	Mesenchymal
GAB2	4.32204e-125	-0.409832	0.42	0.667	1.58191e-120	EC4	Mesenchymal
SLC38A1	4.46747e-125	-0.41283	0.14	0.44	1.63514e-120	EC5	Procoagulatory
NOX4	4.89926e-125	-0.545121	0.143	0.436	1.79318e-120	EC4	Mesenchymal
B4GALT1	1.01187e-124	-0.349047	0.335	0.627	3.70355e-120	EC1	Angiogenic
ARHGAP31	1.721e-124	0.311115	0.722	0.588	6.29903e-120	EC1	Angiogenic
KITLG	1.90123e-124	0.321465	0.38	0.15	6.95868e-120	EC4	Mesenchymal
THBS2	2.09317e-124	-0.395605	0.059	0.246	7.6612e-120	EC2	Proliferative
SHANK3	2.52079e-124	0.262215	0.601	0.344	9.22635e-120	EC2	Proliferative
TPK1	2.62751e-124	0.260965	0.529	0.296	9.61694e-120	EC2	Proliferative
EPB41L3	3.03725e-124	-0.473446	0.136	0.427	1.11166e-119	EC4	Mesenchymal
CAP1	3.54278e-124	0.32296	0.797	0.562	1.29669e-119	EC4	Mesenchymal
BMPR1A	4.33915e-124	0.330159	0.686	0.366	1.58817e-119	EC4	Mesenchymal
PRKCE	6.93006e-124	0.258075	0.838	0.643	2.53647e-119	EC2	Proliferative
CAV1	1.06484e-123	-0.35862	0.598	0.84	3.89743e-119	EC5	Procoagulatory
AP2M1	1.09928e-123	0.325577	0.667	0.384	4.02347e-119	EC4	Mesenchymal
ATP2B4	1.44451e-123	0.346621	0.803	0.56	5.28707e-119	EC4	Mesenchymal
FRMD5	1.59608e-123	-0.421337	0.6	0.788	5.84182e-119	EC5	Procoagulatory
STEAP1B	3.23191e-123	0.267987	0.607	0.372	1.18291e-118	EC2	Proliferative
TPK1	3.40289e-123	-0.429382	0.086	0.373	1.24549e-118	EC4	Mesenchymal
HERC1	3.41747e-123	-0.341075	0.652	0.798	1.25083e-118	EC4	Mesenchymal
SDK1	3.44875e-123	-0.409138	0.037	0.263	1.26228e-118	EC1	Angiogenic
LDHA	3.58027e-123	-0.343307	0.327	0.621	1.31042e-118	EC1	Angiogenic
CXCL6	3.86428e-123	-0.420215	0.412	0.654	1.41436e-118	EC1	Angiogenic
SRGAP2	6.63227e-123	-0.389606	0.356	0.604	2.42748e-118	EC4	Mesenchymal
YIPF5	8.95054e-123	-0.330936	0.26	0.553	3.27599e-118	EC1	Angiogenic
ST3GAL6	1.69092e-122	-0.45699	0.217	0.494	6.18894e-118	EC4	Mesenchymal
ZNF438	2.38129e-122	-0.43741	0.319	0.577	8.71576e-118	EC4	Mesenchymal
DAPK1	2.48708e-122	0.274938	0.83	0.584	9.10297e-118	EC2	Proliferative
B4GALT5	2.90396e-122	-0.396508	0.43	0.657	1.06288e-117	EC4	Mesenchymal
MCC	7.12844e-122	-0.372192	0.61	0.802	2.60908e-117	EC4	Mesenchymal
PLEKHG1	8.65673e-122	-0.462972	0.14	0.432	3.16845e-117	EC5	Procoagulatory
NUDT4	1.25113e-121	-0.456316	0.421	0.643	4.57925e-117	EC4	Mesenchymal
ABCA8	1.32658e-121	0.413727	0.654	0.429	4.85542e-117	EC5	Procoagulatory
TNIK	1.68071e-121	-0.400312	0.67	0.789	6.15156e-117	EC4	Mesenchymal
KLHL4	1.8451e-121	0.271055	0.51	0.278	6.75324e-117	EC2	Proliferative
MMRN1	2.15606e-121	-0.492343	0.13	0.413	7.8914e-117	EC4	Mesenchymal
NEXN	2.39762e-121	-0.340131	0.17	0.443	8.77552e-117	EC1	Angiogenic
LAMB2	2.56882e-121	0.280773	0.459	0.205	9.40215e-117	EC4	Mesenchymal
ELL2	3.55416e-121	-0.359587	0.311	0.597	1.30086e-116	EC1	Angiogenic
ZNF117	3.67252e-121	0.271416	0.504	0.337	1.34418e-116	EC3	Activated mesenchymal-like
BMPR1A	4.38016e-121	0.371107	0.607	0.374	1.60318e-116	EC5	Procoagulatory
NHSL1	4.60601e-121	-0.437547	0.409	0.678	1.68585e-116	EC5	Procoagulatory
LINC00342	6.92948e-121	0.293192	0.638	0.427	2.53626e-116	EC2	Proliferative
MYH9	7.49109e-121	-0.270753	0.781	0.916	2.74181e-116	EC5	Procoagulatory
C2orf27A	1.15943e-120	0.257965	0.65	0.505	4.24364e-116	EC3	Activated mesenchymal-like
PDE4B	1.20896e-120	0.40794	0.588	0.404	4.42492e-116	EC1	Angiogenic
NR2F2-AS1	1.22298e-120	0.389033	0.573	0.381	4.47624e-116	EC1	Angiogenic
LIMK2	1.94479e-120	-0.412051	0.268	0.54	7.11812e-116	EC4	Mesenchymal
SNTB2	2.12329e-120	0.261413	0.75	0.52	7.77147e-116	EC2	Proliferative
FUT8	2.86403e-120	-0.401126	0.587	0.737	1.04826e-115	EC4	Mesenchymal
NLGN1	3.04959e-120	-0.360636	0.717	0.774	1.11618e-115	EC1	Angiogenic
FOXO1	3.08946e-120	0.258403	0.93	0.821	1.13077e-115	EC1	Angiogenic
HDLBP	3.19741e-120	0.275176	0.901	0.734	1.17029e-115	EC4	Mesenchymal
RASA2	4.23022e-120	-0.345627	0.677	0.776	1.5483e-115	EC4	Mesenchymal
ANXA5	5.48338e-120	0.309187	0.823	0.606	2.00697e-115	EC4	Mesenchymal
CALU	6.42013e-120	-0.276919	0.689	0.865	2.34983e-115	EC1	Angiogenic
SEC14L1	7.13646e-120	-0.392329	0.386	0.668	2.61202e-115	EC5	Procoagulatory
JARID2	9.98984e-120	0.382666	0.712	0.481	3.65638e-115	EC4	Mesenchymal
ITGAV	1.04807e-119	-0.278202	0.802	0.9	3.83603e-115	EC5	Procoagulatory
C1QTNF1	1.15259e-119	0.286116	0.278	0.098	4.21858e-115	EC5	Procoagulatory
CHD7	1.99109e-119	-0.436194	0.189	0.47	7.28759e-115	EC4	Mesenchymal
RIPK2	3.26898e-119	0.254618	0.426	0.266	1.19648e-114	EC3	Activated mesenchymal-like
TNFRSF11B	3.40626e-119	0.323899	0.259	0.081	1.24673e-114	EC4	Mesenchymal
INPP5D	5.47662e-119	-0.371746	0.021	0.289	2.0045e-114	EC4	Mesenchymal
NRXN3	6.99534e-119	-0.412391	0.063	0.295	2.56037e-114	EC1	Angiogenic
NR5A2	7.12148e-119	-0.471031	0.025	0.294	2.60653e-114	EC4	Mesenchymal
SH3TC1	7.33715e-119	-0.366877	0.048	0.325	2.68547e-114	EC4	Mesenchymal
AL008633.1	8.73282e-119	0.401369	0.518	0.274	3.1963e-114	EC5	Procoagulatory
TJP2	9.00861e-119	-0.423245	0.334	0.587	3.29724e-114	EC4	Mesenchymal
AC107021.1	1.00635e-118	-0.332169	0.105	0.357	3.68332e-114	EC1	Angiogenic
CD55	1.21763e-118	0.281038	0.646	0.413	4.45663e-114	EC2	Proliferative
ACACA	1.3688e-118	0.26367	0.752	0.546	5.00994e-114	EC2	Proliferative
FLT1	1.71343e-118	0.287712	0.661	0.421	6.27132e-114	EC2	Proliferative
PDE5A	2.39382e-118	-0.369545	0.119	0.369	8.76162e-114	EC1	Angiogenic
AFAP1	3.47861e-118	-0.296079	0.617	0.836	1.2732e-113	EC1	Angiogenic
DPY19L1	3.90028e-118	0.254773	0.656	0.43	1.42754e-113	EC2	Proliferative
TPI1	5.0126e-118	0.327882	0.754	0.516	1.83466e-113	EC4	Mesenchymal
TSPAN14	5.78746e-118	-0.393807	0.253	0.526	2.11827e-113	EC4	Mesenchymal
CDH5	6.10828e-118	0.291778	0.736	0.6	2.23569e-113	EC1	Angiogenic
FAT4	6.33892e-118	-0.472455	0.2	0.474	2.32011e-113	EC4	Mesenchymal
ABCC4	9.08657e-118	0.258897	0.686	0.444	3.32578e-113	EC2	Proliferative
FBN2	1.33475e-117	-0.410875	0.03	0.289	4.88532e-113	EC5	Procoagulatory
FLNB	1.86085e-117	-0.253506	0.846	0.896	6.81089e-113	EC4	Mesenchymal
NRXN3	2.12264e-117	-0.459337	0.032	0.29	7.76909e-113	EC5	Procoagulatory
MAGI2	2.31143e-117	0.320984	0.864	0.724	8.46005e-113	EC5	Procoagulatory
TBC1D5	2.77928e-117	-0.298881	0.726	0.838	1.01724e-112	EC4	Mesenchymal
DOK5	2.89412e-117	0.346634	0.321	0.127	1.05928e-112	EC5	Procoagulatory
FKBP9	2.90133e-117	0.276529	0.442	0.197	1.06192e-112	EC4	Mesenchymal
TSPAN9	4.6815e-117	0.334421	0.652	0.505	1.71348e-112	EC1	Angiogenic
XPOT	4.84748e-117	0.318563	0.596	0.332	1.77422e-112	EC4	Mesenchymal
SORBS2	5.07925e-117	0.444519	0.683	0.427	1.85906e-112	EC4	Mesenchymal
NABP1	5.93172e-117	0.270179	0.679	0.452	2.17107e-112	EC2	Proliferative
KLF12	6.6606e-117	0.356478	0.71	0.428	2.43785e-112	EC4	Mesenchymal
FAR2	7.19355e-117	-0.428436	0.385	0.63	2.63291e-112	EC4	Mesenchymal
PHACTR2	1.33584e-116	-0.303865	0.727	0.823	4.88931e-112	EC4	Mesenchymal
TMEM163	1.46346e-116	-0.411457	0.014	0.276	5.3564e-112	EC4	Mesenchymal
FOCAD	1.76309e-116	0.256741	0.762	0.565	6.45307e-112	EC2	Proliferative
TBC1D8	2.42874e-116	0.260594	0.559	0.329	8.88945e-112	EC2	Proliferative
TNFSF10	2.61496e-116	0.31755	0.393	0.194	9.57103e-112	EC1	Angiogenic
ITGAV	2.87998e-116	-0.259493	0.778	0.908	1.0541e-111	EC1	Angiogenic
MTAP	5.21475e-116	0.265451	0.725	0.497	1.90865e-111	EC2	Proliferative
KCTD16	8.23529e-116	0.407317	0.667	0.385	3.0142e-111	EC4	Mesenchymal
CNTNAP3B	8.69905e-116	0.343737	0.612	0.438	3.18394e-111	EC1	Angiogenic
GALNT2	9.81355e-116	-0.319443	0.378	0.667	3.59186e-111	EC1	Angiogenic
ITGA6	1.438e-115	0.370246	0.535	0.349	5.26322e-111	EC1	Angiogenic
TMEM117	1.47778e-115	0.294529	0.477	0.218	5.40883e-111	EC4	Mesenchymal
SNRK	1.76126e-115	0.263037	0.874	0.692	6.44639e-111	EC2	Proliferative
NBEA	3.84497e-115	0.315803	0.705	0.559	1.4073e-110	EC1	Angiogenic
KIF13B	4.41067e-115	-0.391053	0.225	0.508	1.61435e-110	EC4	Mesenchymal
KLHL4	5.09465e-115	-0.402979	0.079	0.355	1.86469e-110	EC5	Procoagulatory
APLN	5.66232e-115	0.323896	0.226	0.078	2.07246e-110	EC1	Angiogenic
ANXA11	5.89349e-115	0.302573	0.579	0.306	2.15707e-110	EC4	Mesenchymal
GARS	6.62638e-115	-0.334488	0.31	0.581	2.42532e-110	EC1	Angiogenic
DDX58	1.17604e-114	0.258249	0.544	0.384	4.30444e-110	EC3	Activated mesenchymal-like
HIF1A-AS3	1.27549e-114	-0.453006	0.156	0.399	4.66843e-110	EC1	Angiogenic
IL33	1.31925e-114	0.424294	0.482	0.254	4.82857e-110	EC5	Procoagulatory
TRPS1	1.33441e-114	-0.291343	0.421	0.547	4.88408e-110	EC3	Activated mesenchymal-like
RAD51B	1.37222e-114	0.267388	0.795	0.621	5.02248e-110	EC2	Proliferative
KIF21A	1.9819e-114	-0.318109	0.044	0.306	7.25395e-110	EC5	Procoagulatory
TUSC3	2.18588e-114	-0.350016	0.036	0.291	8.00055e-110	EC5	Procoagulatory
SLC10A7	2.59392e-114	0.267951	0.738	0.528	9.494e-110	EC2	Proliferative
PRICKLE1	2.62701e-114	-0.499545	0.177	0.463	9.61511e-110	EC5	Procoagulatory
PPIB	5.15478e-114	0.309622	0.804	0.576	1.8867e-109	EC4	Mesenchymal
SND1	6.87779e-114	-0.278864	0.679	0.877	2.51734e-109	EC1	Angiogenic
KIAA1671	7.76501e-114	0.344658	0.564	0.399	2.84207e-109	EC1	Angiogenic
DACH1	1.58626e-113	-0.479592	0.02	0.267	5.80589e-109	EC5	Procoagulatory
COL5A2	2.13664e-113	-0.316126	0.643	0.83	7.82031e-109	EC1	Angiogenic
FRMD4A	2.57457e-113	-0.311044	0.718	0.875	9.42319e-109	EC5	Procoagulatory
TGM2	3.14256e-113	-0.422794	0.307	0.561	1.15021e-108	EC4	Mesenchymal
ITPKB	3.2615e-113	0.357629	0.4	0.216	1.19374e-108	EC1	Angiogenic
P3H1	5.51862e-113	0.274907	0.495	0.239	2.01987e-108	EC4	Mesenchymal
GLCE	5.7419e-113	0.261326	0.714	0.481	2.10159e-108	EC2	Proliferative
MGAT4A	6.46016e-113	0.346262	0.483	0.288	2.36448e-108	EC1	Angiogenic
PTGS1	8.41666e-113	-0.465348	0.172	0.441	3.08058e-108	EC4	Mesenchymal
ACTR2	1.59115e-112	0.260882	0.894	0.741	5.82376e-108	EC4	Mesenchymal
MICAL2	3.61766e-112	0.290053	0.941	0.749	1.3241e-107	EC4	Mesenchymal
ERRFI1	3.84567e-112	0.35675	0.43	0.199	1.40755e-107	EC4	Mesenchymal
MGST2	4.75228e-112	0.333845	0.427	0.244	1.73938e-107	EC1	Angiogenic
KIAA1211	4.89996e-112	-0.411782	0.035	0.296	1.79343e-107	EC4	Mesenchymal
HSPA5	5.7715e-112	-0.307732	0.562	0.787	2.11243e-107	EC1	Angiogenic
PARVB	7.53322e-112	-0.346238	0.155	0.442	2.75723e-107	EC5	Procoagulatory
LAMA2	8.01371e-112	-0.281668	0.154	0.294	2.9331e-107	EC3	Activated mesenchymal-like
ZDHHC13	1.05328e-111	0.253726	0.516	0.302	3.8551e-107	EC2	Proliferative
MMP16	1.22163e-111	0.306592	0.645	0.432	4.47129e-107	EC2	Proliferative
NABP1	1.62972e-111	-0.34783	0.272	0.536	5.96492e-107	EC1	Angiogenic
TNIK	2.3e-111	-0.341485	0.612	0.805	8.41823e-107	EC1	Angiogenic
ATP2B4	2.78915e-111	0.315077	0.689	0.567	1.02086e-106	EC1	Angiogenic
RGS5	3.05355e-111	0.270132	0.438	0.241	1.11763e-106	EC2	Proliferative
PKD1	3.16021e-111	0.264595	0.421	0.188	1.15667e-106	EC4	Mesenchymal
ZNF438	6.44151e-111	0.272263	0.71	0.509	2.35766e-106	EC2	Proliferative
FMNL3	6.84748e-111	0.34044	0.504	0.334	2.50625e-106	EC1	Angiogenic
SATB2	9.85303e-111	0.299425	0.531	0.264	3.60631e-106	EC4	Mesenchymal
FGD4	1.05729e-110	-0.419312	0.286	0.57	3.86979e-106	EC5	Procoagulatory
DYSF	1.51826e-110	-0.446865	0.152	0.433	5.55699e-106	EC5	Procoagulatory
ZBTB20	1.6946e-110	-0.25028	0.854	0.921	6.2024e-106	EC4	Mesenchymal
ABCA1	1.7026e-110	-0.291285	0.066	0.246	6.23168e-106	EC2	Proliferative
PLPP3	1.92736e-110	0.270237	0.607	0.373	7.05434e-106	EC2	Proliferative
CNTN3	3.42871e-110	-0.360792	0.045	0.259	1.25494e-105	EC1	Angiogenic
IL1RL1	4.96372e-110	-0.392349	0.13	0.366	1.81677e-105	EC1	Angiogenic
SPRED1	5.46963e-110	0.264075	0.734	0.524	2.00194e-105	EC2	Proliferative
ARHGAP26	6.69317e-110	0.323746	0.678	0.531	2.44977e-105	EC1	Angiogenic
RAPGEF1	8.42952e-110	0.298755	0.656	0.533	3.08529e-105	EC1	Angiogenic
BCAT1	1.08504e-109	-0.358124	0.49	0.734	3.97136e-105	EC5	Procoagulatory
TARS	1.37192e-109	0.301901	0.618	0.354	5.02138e-105	EC4	Mesenchymal
XIST	1.79259e-109	0.435436	0.713	0.384	6.56105e-105	EC4	Mesenchymal
ACSM3	3.36558e-109	-0.52839	0.05	0.221	1.23184e-104	EC2	Proliferative
CNOT6L	3.4247e-109	-0.414384	0.308	0.545	1.25348e-104	EC4	Mesenchymal
SGIP1	3.47152e-109	0.412163	0.461	0.232	1.27061e-104	EC5	Procoagulatory
SIPA1L3	4.37049e-109	0.258187	0.783	0.577	1.59964e-104	EC2	Proliferative
INSYN2B	4.80705e-109	-0.382601	0.173	0.413	1.75943e-104	EC1	Angiogenic
ZNF608	5.08759e-109	-0.379315	0.038	0.296	1.86211e-104	EC4	Mesenchymal
SRGAP1	7.25533e-109	0.33181	0.783	0.536	2.65553e-104	EC4	Mesenchymal
RPS6KA5	1.03824e-108	-0.410095	0.069	0.332	3.80006e-104	EC4	Mesenchymal
ARID5B	1.05038e-108	-0.357562	0.344	0.513	3.84448e-104	EC2	Proliferative
VEGFC	1.18808e-108	0.364497	0.763	0.448	4.34851e-104	EC4	Mesenchymal
MSC-AS1	1.18973e-108	-0.3951	0.057	0.271	4.35455e-104	EC1	Angiogenic
SAT1	1.24912e-108	0.350979	0.865	0.727	4.57191e-104	EC5	Procoagulatory
S100A11	1.28448e-108	0.313261	0.609	0.353	4.70134e-104	EC4	Mesenchymal
INPP5D	1.48666e-108	-0.334035	0.037	0.29	5.44131e-104	EC5	Procoagulatory
ANKRD1	1.75548e-108	-0.388172	0.27	0.53	6.42523e-104	EC1	Angiogenic
CDH11	1.7981e-108	0.30238	0.951	0.754	6.58124e-104	EC4	Mesenchymal
PCOLCE2	2.53414e-108	0.259853	0.221	0.068	9.27521e-104	EC5	Procoagulatory
PIEZO2	2.72819e-108	0.345447	0.608	0.311	9.98546e-104	EC4	Mesenchymal
IARS	5.00514e-108	0.250566	0.707	0.494	1.83193e-103	EC2	Proliferative
KCNS3	5.02995e-108	-0.402241	0.096	0.37	1.84101e-103	EC4	Mesenchymal
CD93	6.12017e-108	-0.380572	0.076	0.336	2.24004e-103	EC4	Mesenchymal
PARP14	7.08466e-108	-0.416347	0.288	0.544	2.59306e-103	EC4	Mesenchymal
MYO6	7.24242e-108	-0.365621	0.474	0.67	2.6508e-103	EC4	Mesenchymal
VCL	7.3932e-108	-0.310782	0.542	0.773	2.70599e-103	EC1	Angiogenic
MT2A	8.66318e-108	-0.394928	0.407	0.652	3.17081e-103	EC1	Angiogenic
EIF1	9.53689e-108	0.278615	0.872	0.693	3.4906e-103	EC4	Mesenchymal
FBN2	1.02122e-107	0.282788	0.412	0.221	3.73778e-103	EC2	Proliferative
UACA	1.68761e-107	0.304115	0.857	0.778	6.17683e-103	EC5	Procoagulatory
SH3RF1	1.87096e-107	-0.309963	0.581	0.785	6.84791e-103	EC1	Angiogenic
ERBB4	5.48871e-107	0.312853	0.228	0.072	2.00892e-102	EC5	Procoagulatory
RCAN1	6.06687e-107	0.276881	0.347	0.143	2.22054e-102	EC4	Mesenchymal
RRAS2	8.00534e-107	-0.319772	0.446	0.705	2.93003e-102	EC1	Angiogenic
SAMD4A	1.2236e-106	-0.367098	0.618	0.805	4.47851e-102	EC5	Procoagulatory
VCAN	2.44033e-106	-0.458179	0.31	0.471	8.93187e-102	EC2	Proliferative
TUSC3	2.54722e-106	0.297867	0.485	0.235	9.32308e-102	EC4	Mesenchymal
CMTM7	3.08101e-106	0.341148	0.528	0.355	1.12768e-101	EC1	Angiogenic
RABAC1	3.22437e-106	0.299492	0.59	0.33	1.18015e-101	EC4	Mesenchymal
DANT2	3.31612e-106	0.348397	0.612	0.398	1.21373e-101	EC5	Procoagulatory
SMAD1	4.90877e-106	-0.415406	0.209	0.469	1.79666e-101	EC4	Mesenchymal
GATA6	5.39961e-106	0.352175	0.687	0.507	1.97631e-101	EC5	Procoagulatory
RUNX1T1	7.64523e-106	0.291151	0.733	0.511	2.79823e-101	EC2	Proliferative
PLEKHA5	1.12926e-105	0.340545	0.789	0.654	4.1332e-101	EC5	Procoagulatory
STYK1	1.44554e-105	-0.325164	0.024	0.271	5.29082e-101	EC4	Mesenchymal
EVA1C	1.98475e-105	-0.420696	0.269	0.515	7.26437e-101	EC4	Mesenchymal
TXNDC5	2.74578e-105	-0.270405	0.683	0.879	1.00498e-100	EC1	Angiogenic
EPHA4	3.90812e-105	-0.417128	0.137	0.404	1.43041e-100	EC4	Mesenchymal
RFTN2	4.62824e-105	0.262055	0.254	0.089	1.69398e-100	EC5	Procoagulatory
SHROOM4	4.63883e-105	-0.380551	0.383	0.644	1.69786e-100	EC5	Procoagulatory
NME2	6.09021e-105	0.298719	0.817	0.587	2.22908e-100	EC4	Mesenchymal
BMX	8.65689e-105	-0.373496	0.141	0.421	3.16851e-100	EC5	Procoagulatory
KRT18	9.42754e-105	0.370856	0.548	0.295	3.45057e-100	EC4	Mesenchymal
GAB1	1.43169e-104	0.399637	0.548	0.4	5.24014e-100	EC1	Angiogenic
LINC01605	1.51347e-104	-0.292782	0.019	0.21	5.53944e-100	EC1	Angiogenic
NFAT5	2.60587e-104	-0.253824	0.826	0.901	9.53773e-100	EC4	Mesenchymal
COL5A2	2.93e-104	0.270633	0.892	0.791	1.07241e-99	EC5	Procoagulatory
TUBB	3.02924e-104	0.306576	0.792	0.559	1.10873e-99	EC4	Mesenchymal
PALMD	3.48795e-104	-0.3958	0.189	0.471	1.27663e-99	EC5	Procoagulatory
CCBE1	4.16737e-104	0.354514	0.597	0.32	1.5253e-99	EC4	Mesenchymal
ATP8A1	4.28403e-104	0.263854	0.242	0.115	1.568e-99	EC3	Activated mesenchymal-like
AMOTL1	4.34033e-104	0.322012	0.632	0.389	1.5886e-99	EC4	Mesenchymal
NUAK1	9.19396e-104	-0.404747	0.183	0.46	3.36508e-99	EC5	Procoagulatory
PID1	9.54184e-104	-0.323069	0.025	0.179	3.49241e-99	EC2	Proliferative
PRKCA	1.31835e-103	-0.299196	0.643	0.829	4.82529e-99	EC1	Angiogenic
TNFRSF10B	1.4689e-103	-0.337618	0.529	0.698	5.37632e-99	EC4	Mesenchymal
TNFRSF12A	1.65184e-103	0.291083	0.549	0.299	6.04591e-99	EC4	Mesenchymal
ITSN2	2.16163e-103	-0.33743	0.485	0.682	7.91177e-99	EC4	Mesenchymal
FLNA	2.78584e-103	-0.309051	0.543	0.775	1.01964e-98	EC1	Angiogenic
SEPTIN11	2.80806e-103	0.278552	0.886	0.746	1.02778e-98	EC4	Mesenchymal
UST	3.03666e-103	-0.253589	0.183	0.323	1.11145e-98	EC3	Activated mesenchymal-like
NRCAM	3.80951e-103	0.259692	0.778	0.588	1.39432e-98	EC3	Activated mesenchymal-like
AC083870.1	3.89557e-103	0.345146	0.633	0.384	1.42582e-98	EC4	Mesenchymal
CNNM2	4.25884e-103	-0.343214	0.179	0.425	1.55878e-98	EC1	Angiogenic
ABCA6	4.40319e-103	-0.369192	0.242	0.419	1.61161e-98	EC2	Proliferative
COL3A1	5.40819e-103	-0.512385	0.233	0.46	1.97945e-98	EC1	Angiogenic
CCDC91	5.53441e-103	-0.320291	0.317	0.587	2.02565e-98	EC1	Angiogenic
STAT1	5.82659e-103	-0.357741	0.41	0.549	2.13259e-98	EC2	Proliferative
SUPT3H	8.66883e-103	0.257959	0.709	0.505	3.17288e-98	EC2	Proliferative
ABCA1	8.84624e-103	0.304681	0.414	0.186	3.23781e-98	EC4	Mesenchymal
ITGA6	1.05178e-102	-0.411508	0.147	0.404	3.84963e-98	EC4	Mesenchymal
ANXA1	1.09018e-102	0.301995	0.792	0.564	3.99017e-98	EC4	Mesenchymal
IPO9-AS1	1.11423e-102	0.299055	0.576	0.32	4.0782e-98	EC4	Mesenchymal
NRP1	1.29225e-102	0.285938	0.821	0.718	4.72975e-98	EC1	Angiogenic
TGFB2	1.73562e-102	0.3059	0.455	0.308	6.35253e-98	EC3	Activated mesenchymal-like
THBS2	1.82078e-102	-0.38091	0.041	0.238	6.66423e-98	EC1	Angiogenic
TEK	2.49325e-102	0.340968	0.607	0.441	9.12554e-98	EC1	Angiogenic
DACH1	2.69158e-102	-0.478182	0.025	0.264	9.85145e-98	EC4	Mesenchymal
ELK3	3.82308e-102	-0.332563	0.561	0.739	1.39929e-97	EC4	Mesenchymal
SACS	4.82282e-102	-0.304706	0.313	0.578	1.7652e-97	EC1	Angiogenic
SMAD7	7.83937e-102	0.257784	0.455	0.211	2.86929e-97	EC4	Mesenchymal
AC098588.3	7.97338e-102	-0.356197	0.319	0.56	2.91834e-97	EC1	Angiogenic
GLI2	8.54192e-102	-0.283838	0.022	0.212	3.12643e-97	EC1	Angiogenic
ARRB1	1.05777e-101	-0.379853	0.065	0.314	3.87153e-97	EC4	Mesenchymal
TNFRSF11B	1.22203e-101	0.31994	0.238	0.082	4.47274e-97	EC5	Procoagulatory
TMCC3	1.43207e-101	-0.340904	0.02	0.257	5.2415e-97	EC4	Mesenchymal
TACC1	1.46688e-101	-0.358286	0.505	0.75	5.36893e-97	EC5	Procoagulatory
CHRM3	1.82708e-101	0.261052	0.296	0.132	6.6873e-97	EC2	Proliferative
SLC7A2	1.91846e-101	-0.581053	0.346	0.57	7.02176e-97	EC4	Mesenchymal
RUNX1	2.52018e-101	0.254187	0.619	0.483	9.22411e-97	EC3	Activated mesenchymal-like
CA12	4.59302e-101	0.281026	0.228	0.076	1.68109e-96	EC5	Procoagulatory
NOTCH2	7.39316e-101	-0.281179	0.127	0.364	2.70597e-96	EC1	Angiogenic
SPOCD1	9.16138e-101	-0.294638	0.168	0.411	3.35316e-96	EC1	Angiogenic
TRIM24	9.64679e-101	-0.402921	0.285	0.55	3.53082e-96	EC5	Procoagulatory
PDE7B	1.30289e-100	0.270594	0.752	0.547	4.76871e-96	EC2	Proliferative
TWIST2	1.44091e-100	0.268167	0.39	0.171	5.27389e-96	EC4	Mesenchymal
EHD4	1.54785e-100	-0.374749	0.257	0.5	5.6653e-96	EC4	Mesenchymal
SAMD4A	1.87148e-100	-0.317482	0.602	0.816	6.84982e-96	EC1	Angiogenic
IMMP2L	2.29397e-100	-0.338703	0.723	0.812	8.39617e-96	EC4	Mesenchymal
KIAA1549L	2.97048e-100	0.268068	0.741	0.532	1.08722e-95	EC2	Proliferative
BMP6	4.41094e-100	-0.290285	0.718	0.836	1.61445e-95	EC1	Angiogenic
QSOX1	4.82958e-100	-0.292052	0.252	0.514	1.76767e-95	EC1	Angiogenic
DCBLD2	5.30059e-100	0.250727	0.84	0.638	1.94007e-95	EC2	Proliferative
ACVRL1	6.1946e-100	-0.34109	0.13	0.39	2.26729e-95	EC4	Mesenchymal
EFNA5	7.04763e-100	0.315488	0.767	0.575	2.5795e-95	EC1	Angiogenic
SH3RF2	7.26117e-100	-0.330646	0.073	0.285	2.65766e-95	EC1	Angiogenic
ANTXR1	7.74779e-100	-0.33077	0.207	0.396	2.83577e-95	EC2	Proliferative
EPS8	7.75597e-100	0.400702	0.591	0.396	2.83876e-95	EC5	Procoagulatory
ENOX1	8.33562e-100	-0.438841	0.274	0.538	3.05092e-95	EC5	Procoagulatory
GLIPR1	9.05159e-100	-0.283661	0.202	0.454	3.31297e-95	EC1	Angiogenic
CTNNB1	9.1622e-100	-0.315457	0.59	0.747	3.35346e-95	EC4	Mesenchymal
TMEM163	1.11186e-99	-0.365225	0.041	0.275	4.06953e-95	EC5	Procoagulatory
STAU2	1.41113e-99	-0.335581	0.51	0.698	5.16489e-95	EC4	Mesenchymal
MYH10	1.662e-99	-0.347928	0.497	0.611	6.0831e-95	EC2	Proliferative
NR2F1	2.18248e-99	-0.270819	0.099	0.326	7.98809e-95	EC1	Angiogenic
CYTOR	2.42095e-99	-0.302914	0.273	0.543	8.86092e-95	EC1	Angiogenic
CAVIN1	2.58521e-99	0.264635	0.891	0.74	9.46215e-95	EC4	Mesenchymal
AL356124.1	2.71549e-99	0.348383	0.703	0.568	9.93896e-95	EC1	Angiogenic
PDGFB	2.96189e-99	-0.339054	0.046	0.287	1.08408e-94	EC4	Mesenchymal
MIR217HG	3.54067e-99	0.3692	0.306	0.138	1.29592e-94	EC1	Angiogenic
ARHGEF3	3.79435e-99	0.337679	0.609	0.451	1.38877e-94	EC1	Angiogenic
IGF2R	4.28528e-99	0.296398	0.668	0.422	1.56846e-94	EC4	Mesenchymal
ANTXR2	5.11315e-99	-0.318405	0.5	0.722	1.87146e-94	EC1	Angiogenic
CDH5	5.23572e-99	-0.349984	0.384	0.65	1.91633e-94	EC5	Procoagulatory
PTPRF	5.58114e-99	-0.290689	0.286	0.564	2.04275e-94	EC1	Angiogenic
LINC02742	8.92175e-99	-0.47877	0.397	0.626	3.26545e-94	EC5	Procoagulatory
DDX60L	8.99604e-99	-0.40001	0.307	0.54	3.29264e-94	EC4	Mesenchymal
ARHGAP10	1.07949e-98	-0.30734	0.31	0.577	3.95103e-94	EC1	Angiogenic
PDGFC	1.10885e-98	-0.299703	0.117	0.347	4.05849e-94	EC1	Angiogenic
STAB1	3.0819e-98	-0.302066	0.053	0.299	1.12801e-93	EC4	Mesenchymal
MYO1B	3.35019e-98	0.258427	0.526	0.253	1.2262e-93	EC4	Mesenchymal
EXOC6	4.38496e-98	-0.380587	0.532	0.741	1.60494e-93	EC5	Procoagulatory
ARHGAP22	9.74995e-98	-0.309117	0.448	0.707	3.56858e-93	EC1	Angiogenic
DOCK7	1.07282e-97	-0.297306	0.348	0.615	3.92662e-93	EC1	Angiogenic
TRIM37	1.44796e-97	-0.305581	0.366	0.624	5.29969e-93	EC1	Angiogenic
JCAD	2.32348e-97	0.315377	0.475	0.304	8.50418e-93	EC1	Angiogenic
PLA2G4C	2.65332e-97	-0.407578	0.087	0.331	9.7114e-93	EC4	Mesenchymal
RBPMS	2.73511e-97	0.302501	0.779	0.559	1.00108e-92	EC4	Mesenchymal
NAV2	3.11301e-97	-0.321853	0.584	0.78	1.13939e-92	EC1	Angiogenic
ROBO4	3.8775e-97	-0.333306	0.07	0.316	1.4192e-92	EC4	Mesenchymal
MAGI2	4.15919e-97	-0.264259	0.648	0.763	1.52231e-92	EC2	Proliferative
ADK	4.50371e-97	-0.280389	0.754	0.862	1.6484e-92	EC5	Procoagulatory
MN1	5.41045e-97	0.29004	0.344	0.153	1.98028e-92	EC5	Procoagulatory
AK4	7.06497e-97	0.271327	0.485	0.246	2.58585e-92	EC4	Mesenchymal
SOX7	9.2071e-97	0.314283	0.409	0.235	3.36989e-92	EC1	Angiogenic
P4HB	1.33435e-96	-0.281684	0.539	0.775	4.88387e-92	EC1	Angiogenic
ESM1	1.49111e-96	-0.434714	0.264	0.488	5.45761e-92	EC4	Mesenchymal
PRRX1	1.92964e-96	-0.314931	0.052	0.248	7.06268e-92	EC1	Angiogenic
PTCHD4	2.58227e-96	-0.432606	0.196	0.466	9.45137e-92	EC5	Procoagulatory
SERPINE2	3.59909e-96	-0.333934	0.528	0.626	1.3173e-91	EC2	Proliferative
LAMA2	3.78114e-96	-0.316058	0.1	0.267	1.38393e-91	EC2	Proliferative
TBCD	5.32182e-96	-0.308786	0.168	0.439	1.94784e-91	EC5	Procoagulatory
G2E3	6.39764e-96	0.253331	0.509	0.325	2.3416e-91	EC2	Proliferative
SULF1	6.94611e-96	0.37659	0.951	0.628	2.54235e-91	EC4	Mesenchymal
SNTB2	8.15311e-96	-0.342584	0.33	0.596	2.98412e-91	EC5	Procoagulatory
IARS	1.02758e-95	-0.298607	0.317	0.575	3.76105e-91	EC1	Angiogenic
ITSN1	1.26988e-95	-0.27442	0.705	0.792	4.64787e-91	EC4	Mesenchymal
PBX1	1.27667e-95	-0.349954	0.24	0.414	4.67276e-91	EC2	Proliferative
TTLL7	1.49209e-95	0.258688	0.407	0.186	5.46119e-91	EC4	Mesenchymal
PCMTD1	2.92544e-95	-0.325968	0.519	0.696	1.07074e-90	EC4	Mesenchymal
IL1R1	3.77594e-95	-0.36783	0.276	0.432	1.38203e-90	EC2	Proliferative
SELENOT	3.78501e-95	-0.300949	0.319	0.576	1.38535e-90	EC1	Angiogenic
DAAM1	3.98532e-95	-0.355748	0.457	0.653	1.45867e-90	EC4	Mesenchymal
PAPPA	6.46311e-95	0.457855	0.566	0.336	2.36556e-90	EC5	Procoagulatory
ITGB8	7.43007e-95	-0.418787	0.081	0.319	2.71948e-90	EC5	Procoagulatory
ODF2L	1.26607e-94	-0.313154	0.515	0.691	4.63394e-90	EC4	Mesenchymal
MIR222HG	1.33842e-94	-0.326318	0.312	0.56	4.89873e-90	EC1	Angiogenic
BMPER	1.51398e-94	-0.374017	0.153	0.388	5.5413e-90	EC1	Angiogenic
MPRIP	1.85958e-94	0.28624	0.769	0.569	6.80623e-90	EC4	Mesenchymal
AUTS2	2.1375e-94	-0.25367	0.088	0.206	7.82346e-90	EC3	Activated mesenchymal-like
EBF1	2.19572e-94	-0.282601	0.038	0.187	8.03656e-90	EC2	Proliferative
ESAM	2.55863e-94	-0.335463	0.102	0.347	9.36483e-90	EC4	Mesenchymal
SKAP2	2.99468e-94	-0.307332	0.075	0.316	1.09608e-89	EC5	Procoagulatory
IRAK3	3.11523e-94	0.41344	0.535	0.351	1.14021e-89	EC5	Procoagulatory
TNFRSF12A	3.49311e-94	-0.259075	0.131	0.36	1.27851e-89	EC1	Angiogenic
FAP	5.01884e-94	-0.305341	0.097	0.27	1.83695e-89	EC2	Proliferative
CEMIP	5.88884e-94	0.314431	0.22	0.07	2.15537e-89	EC4	Mesenchymal
BICC1	6.16158e-94	-0.43172	0.367	0.618	2.2552e-89	EC5	Procoagulatory
MYOF	6.24238e-94	-0.267799	0.639	0.826	2.28477e-89	EC1	Angiogenic
SSH2	6.5738e-94	-0.265028	0.74	0.878	2.40607e-89	EC5	Procoagulatory
CALCRL	8.7002e-94	-0.414121	0.512	0.719	3.18436e-89	EC5	Procoagulatory
AHNAK	9.15025e-94	0.286754	0.848	0.66	3.34908e-89	EC4	Mesenchymal
MCAM	1.06573e-93	-0.366858	0.35	0.603	3.90069e-89	EC5	Procoagulatory
ETS2	1.43724e-93	0.305192	0.407	0.24	5.26043e-89	EC1	Angiogenic
SYNE1	1.76733e-93	-0.31209	0.463	0.694	6.46859e-89	EC1	Angiogenic
SLC16A1	2.45701e-93	-0.290212	0.266	0.519	8.99289e-89	EC1	Angiogenic
CNTNAP3	3.25344e-93	-0.381496	0.115	0.362	1.19079e-88	EC4	Mesenchymal
OSGIN2	3.33857e-93	-0.351319	0.14	0.386	1.22195e-88	EC4	Mesenchymal
DLG2	4.37105e-93	0.380203	0.385	0.199	1.59985e-88	EC5	Procoagulatory
EIF4G1	6.11195e-93	-0.278745	0.341	0.611	2.23704e-88	EC1	Angiogenic
EPRS	6.98245e-93	0.28748	0.686	0.45	2.55565e-88	EC4	Mesenchymal
PALM2-AKAP2	7.57559e-93	-0.311014	0.67	0.874	2.77274e-88	EC5	Procoagulatory
KDELR2	8.29523e-93	0.283776	0.61	0.368	3.03614e-88	EC4	Mesenchymal
PKIG	8.54511e-93	-0.376809	0.269	0.492	3.1276e-88	EC4	Mesenchymal
RARB	9.02291e-93	-0.316522	0.346	0.604	3.30248e-88	EC1	Angiogenic
ALDH1A3	9.20165e-93	0.336858	0.636	0.383	3.3679e-88	EC4	Mesenchymal
MTHFD1L	1.03266e-92	-0.26932	0.643	0.846	3.77965e-88	EC1	Angiogenic
SOX7	1.35313e-92	-0.331573	0.052	0.286	4.9526e-88	EC4	Mesenchymal
MIF	2.124e-92	0.287121	0.684	0.452	7.77406e-88	EC4	Mesenchymal
RAPGEF5	2.51737e-92	0.387526	0.649	0.461	9.21384e-88	EC5	Procoagulatory
ID2	2.61085e-92	0.316326	0.244	0.092	9.55596e-88	EC5	Procoagulatory
FLI1	3.1784e-92	-0.265219	0.782	0.902	1.16333e-87	EC5	Procoagulatory
VPS13C	6.03408e-92	-0.287973	0.666	0.764	2.20853e-87	EC4	Mesenchymal
MSRB3	7.20047e-92	-0.27039	0.614	0.816	2.63544e-87	EC1	Angiogenic
TANK	9.30655e-92	-0.31639	0.607	0.728	3.40629e-87	EC4	Mesenchymal
FST	9.78798e-92	-0.30468	0.07	0.267	3.5825e-87	EC1	Angiogenic
TRPS1	1.12034e-91	-0.331264	0.378	0.521	4.10057e-87	EC2	Proliferative
RFX3	1.3531e-91	-0.353568	0.363	0.584	4.95247e-87	EC4	Mesenchymal
IGFBP5	1.73953e-91	0.471431	0.407	0.202	6.36685e-87	EC4	Mesenchymal
LOX	1.89453e-91	-0.339797	0.192	0.419	6.93418e-87	EC1	Angiogenic
STARD13	2.05085e-91	-0.287498	0.611	0.785	7.50633e-87	EC1	Angiogenic
AFDN	2.27763e-91	0.251624	0.719	0.636	8.33637e-87	EC1	Angiogenic
SEC61A1	3.08707e-91	0.274916	0.744	0.52	1.1299e-86	EC4	Mesenchymal
OXSR1	3.17953e-91	0.28593	0.691	0.459	1.16374e-86	EC4	Mesenchymal
NRCAM	3.65171e-91	-0.365848	0.52	0.696	1.33656e-86	EC1	Angiogenic
AC010737.1	3.92538e-91	-0.373754	0.019	0.237	1.43673e-86	EC4	Mesenchymal
PVR	3.97638e-91	-0.279396	0.24	0.488	1.45539e-86	EC1	Angiogenic
SLCO1C1	6.81223e-91	0.32345	0.277	0.116	2.49335e-86	EC5	Procoagulatory
CD151	1.05627e-90	0.2816	0.708	0.471	3.86604e-86	EC4	Mesenchymal
TNFRSF21	2.33277e-90	-0.363697	0.102	0.34	8.53819e-86	EC4	Mesenchymal
ACER3	2.39804e-90	-0.337947	0.324	0.576	8.77705e-86	EC5	Procoagulatory
LMAN1	2.47961e-90	0.279938	0.752	0.535	9.07561e-86	EC4	Mesenchymal
SYNJ2	2.98551e-90	-0.263857	0.73	0.823	1.09273e-85	EC4	Mesenchymal
HSPA5	3.31724e-90	0.261844	0.914	0.735	1.21414e-85	EC4	Mesenchymal
TPM4	3.77206e-90	-0.252671	0.662	0.843	1.38061e-85	EC1	Angiogenic
KRT7	3.87483e-90	-0.308677	0.179	0.41	1.41823e-85	EC1	Angiogenic
VCAN	4.77826e-90	0.419248	0.622	0.416	1.74889e-85	EC5	Procoagulatory
LIMCH1	4.98577e-90	-0.357766	0.334	0.483	1.82484e-85	EC2	Proliferative
DPYSL2	5.8908e-90	0.294555	0.677	0.429	2.15609e-85	EC4	Mesenchymal
EGFL7	6.45018e-90	0.271699	0.702	0.571	2.36083e-85	EC1	Angiogenic
PRCP	7.71588e-90	-0.340026	0.344	0.607	2.82409e-85	EC5	Procoagulatory
NAMPT	3.20696e-89	-0.418274	0.355	0.56	1.17378e-84	EC4	Mesenchymal
TMTC1	4.33638e-89	0.292628	0.29	0.121	1.58716e-84	EC5	Procoagulatory
HEG1	4.75597e-89	0.335194	0.761	0.643	1.74073e-84	EC5	Procoagulatory
MT-ATP8	4.85218e-89	-0.345544	0.503	0.719	1.77595e-84	EC1	Angiogenic
CNTNAP3B	5.58868e-89	-0.378241	0.255	0.489	2.04551e-84	EC4	Mesenchymal
MEIS2	6.42112e-89	0.251513	0.894	0.838	2.35019e-84	EC5	Procoagulatory
RAPGEF4	7.20445e-89	-0.362178	0.099	0.333	2.6369e-84	EC4	Mesenchymal
CLEC14A	9.53197e-89	-0.322289	0.086	0.319	3.4888e-84	EC4	Mesenchymal
MIR100HG	9.63269e-89	0.294422	0.968	0.781	3.52566e-84	EC4	Mesenchymal
DEPP1	1.07336e-88	0.300522	0.323	0.164	3.92862e-84	EC1	Angiogenic
PTPRK	1.07745e-88	-0.254111	0.818	0.915	3.94359e-84	EC5	Procoagulatory
ANXA3	1.51724e-88	-0.312146	0.067	0.298	5.55325e-84	EC4	Mesenchymal
NHSL2	2.08663e-88	-0.282815	0.029	0.241	7.63728e-84	EC5	Procoagulatory
IGFBP3	2.11346e-88	-0.402503	0.19	0.403	7.73548e-84	EC1	Angiogenic
RFLNA	2.48455e-88	-0.273153	0.095	0.302	9.09372e-84	EC1	Angiogenic
DHRS3	2.89193e-88	-0.284673	0.183	0.353	1.05848e-83	EC2	Proliferative
LIMS1	2.91068e-88	-0.285214	0.607	0.818	1.06534e-83	EC5	Procoagulatory
TRAK1	4.8273e-88	0.262886	0.686	0.606	1.76684e-83	EC1	Angiogenic
TLE1	5.16842e-88	-0.318956	0.198	0.457	1.89169e-83	EC5	Procoagulatory
SRPX2	7.8033e-88	-0.347703	0.329	0.554	2.85608e-83	EC4	Mesenchymal
DTNB	1.01102e-87	-0.328387	0.104	0.336	3.70045e-83	EC4	Mesenchymal
PRKAR2B	1.21109e-87	-0.315694	0.038	0.255	4.43273e-83	EC4	Mesenchymal
ZNF618	1.57517e-87	-0.3442	0.377	0.581	5.76528e-83	EC4	Mesenchymal
DYNC1I1	2.14013e-87	0.386714	0.434	0.255	7.8331e-83	EC5	Procoagulatory
PTPRJ	2.73123e-87	-0.276281	0.27	0.526	9.99658e-83	EC1	Angiogenic
CSF3	2.7728e-87	-0.323314	0.132	0.339	1.01487e-82	EC1	Angiogenic
F11R	3.75811e-87	-0.287039	0.069	0.298	1.37551e-82	EC4	Mesenchymal
MB21D2	3.84713e-87	-0.28316	0.164	0.386	1.40809e-82	EC1	Angiogenic
YES1	4.16339e-87	-0.34709	0.469	0.633	1.52384e-82	EC4	Mesenchymal
NOCT	5.03663e-87	-0.26495	0.154	0.377	1.84346e-82	EC1	Angiogenic
AFAP1L1	5.24175e-87	-0.350759	0.103	0.335	1.91853e-82	EC5	Procoagulatory
GLIS3	6.031e-87	0.4716	0.683	0.571	2.20741e-82	EC1	Angiogenic
CCND1	6.73482e-87	0.295751	0.713	0.466	2.46501e-82	EC4	Mesenchymal
RGS3	6.9722e-87	0.275603	0.639	0.51	2.55189e-82	EC1	Angiogenic
AC110058.1	7.46607e-87	-0.320623	0.052	0.274	2.73266e-82	EC4	Mesenchymal
ENG	8.14053e-87	-0.272588	0.655	0.774	2.97951e-82	EC4	Mesenchymal
MEG8	1.24471e-86	-0.427277	0.107	0.298	4.55575e-82	EC1	Angiogenic
C11orf80	4.52221e-86	-0.341343	0.251	0.479	1.65518e-81	EC4	Mesenchymal
LMO7	4.63519e-86	-0.334422	0.179	0.401	1.69652e-81	EC1	Angiogenic
CORO1C	4.69815e-86	0.28303	0.785	0.559	1.71957e-81	EC4	Mesenchymal
FAM214A	5.15437e-86	0.309286	0.571	0.442	1.88655e-81	EC1	Angiogenic
LOX	5.49568e-86	-0.287329	0.323	0.433	2.01147e-81	EC3	Activated mesenchymal-like
IL1RAPL1	7.43268e-86	-0.495904	0.013	0.207	2.72044e-81	EC5	Procoagulatory
AMPH	8.72758e-86	-0.33034	0.009	0.202	3.19438e-81	EC5	Procoagulatory
LINC01151	9.27376e-86	0.276027	0.224	0.08	3.39429e-81	EC5	Procoagulatory
KCTD20	1.02523e-85	0.280267	0.511	0.294	3.75246e-81	EC4	Mesenchymal
MCTP2	1.09513e-85	-0.34335	0.088	0.316	4.00827e-81	EC4	Mesenchymal
LMBR1	1.5042e-85	0.288398	0.622	0.534	5.50551e-81	EC1	Angiogenic
ACSL4	1.68083e-85	-0.283427	0.419	0.661	6.152e-81	EC1	Angiogenic
ANXA6	1.87954e-85	0.252723	0.503	0.271	6.87929e-81	EC4	Mesenchymal
PALLD	1.90187e-85	0.318989	0.657	0.4	6.96104e-81	EC4	Mesenchymal
MT-ATP8	2.53243e-85	-0.378097	0.503	0.711	9.26893e-81	EC5	Procoagulatory
MYEF2	2.58309e-85	-0.30917	0.106	0.336	9.45436e-81	EC4	Mesenchymal
STRBP	2.60936e-85	0.303449	0.402	0.245	9.55054e-81	EC1	Angiogenic
AXL	2.65756e-85	0.279684	0.613	0.368	9.72692e-81	EC4	Mesenchymal
GLCE	3.92976e-85	-0.334932	0.301	0.556	1.43833e-80	EC5	Procoagulatory
TPST1	4.83381e-85	-0.285912	0.494	0.718	1.76922e-80	EC1	Angiogenic
ADAM19	5.5848e-85	0.314554	0.44	0.277	2.04409e-80	EC1	Angiogenic
PID1	6.01342e-85	-0.313676	0.013	0.171	2.20097e-80	EC1	Angiogenic
LRCH1	6.08178e-85	0.306569	0.527	0.383	2.22599e-80	EC1	Angiogenic
UBASH3B	6.89745e-85	-0.26801	0.133	0.346	2.52454e-80	EC1	Angiogenic
CASC15	8.76643e-85	0.27936	0.797	0.711	3.2086e-80	EC1	Angiogenic
EDIL3	8.85053e-85	-0.361724	0.299	0.452	3.23938e-80	EC2	Proliferative
PIK3C2B	1.00275e-84	-0.330443	0.044	0.257	3.67016e-80	EC4	Mesenchymal
PDE10A	1.2449e-84	-0.303492	0.544	0.714	4.55646e-80	EC1	Angiogenic
ITGA1	1.26506e-84	0.285259	0.408	0.208	4.63024e-80	EC5	Procoagulatory
CREB3L2	1.58897e-84	-0.276208	0.358	0.616	5.81579e-80	EC1	Angiogenic
CDH6	1.86356e-84	-0.281299	0.022	0.186	6.82083e-80	EC1	Angiogenic
JAG1	2.39968e-84	-0.291201	0.324	0.566	8.78308e-80	EC1	Angiogenic
PGM3	2.85668e-84	-0.251335	0.212	0.45	1.04558e-79	EC1	Angiogenic
ACKR3	3.01251e-84	-0.314738	0.054	0.272	1.10261e-79	EC4	Mesenchymal
GXYLT2	3.78556e-84	-0.271308	0.097	0.296	1.38555e-79	EC1	Angiogenic
CLIP2	3.84317e-84	0.277779	0.46	0.248	1.40664e-79	EC4	Mesenchymal
SLC7A1	3.85241e-84	-0.256574	0.155	0.373	1.41002e-79	EC1	Angiogenic
DGLUCY	4.75155e-84	-0.32289	0.127	0.361	1.73911e-79	EC4	Mesenchymal
CAB39	5.95997e-84	-0.29316	0.626	0.73	2.18141e-79	EC4	Mesenchymal
XAF1	9.09374e-84	0.330321	0.551	0.355	3.3284e-79	EC5	Procoagulatory
PLK2	1.01078e-83	-0.341441	0.239	0.469	3.69956e-79	EC4	Mesenchymal
PIK3CB	1.46737e-83	-0.319435	0.294	0.517	5.37072e-79	EC4	Mesenchymal
SAMD12	2.19958e-83	0.33262	0.327	0.158	8.05068e-79	EC5	Procoagulatory
TRIM24	4.69992e-83	-0.396318	0.352	0.539	1.72022e-78	EC4	Mesenchymal
CASC15	4.77011e-83	-0.355765	0.644	0.734	1.74591e-78	EC5	Procoagulatory
CARD11	5.47101e-83	-0.270926	0.127	0.331	2.00245e-78	EC1	Angiogenic
MEG3	6.51725e-83	-0.387814	0.109	0.297	2.38538e-78	EC1	Angiogenic
MAGI1	7.40424e-83	0.278934	0.883	0.721	2.71003e-78	EC4	Mesenchymal
PDLIM1	7.63774e-83	-0.334108	0.406	0.595	2.79549e-78	EC4	Mesenchymal
COL6A2	7.91131e-83	-0.336419	0.067	0.21	2.89562e-78	EC2	Proliferative
PIK3R3	8.22373e-83	0.303601	0.344	0.193	3.00997e-78	EC1	Angiogenic
ADAMTS1	8.32529e-83	-0.283293	0.144	0.357	3.04714e-78	EC1	Angiogenic
ATF6	1.41979e-82	-0.296019	0.521	0.67	5.19659e-78	EC4	Mesenchymal
ANKRD50	1.6193e-82	-0.279772	0.394	0.64	5.92682e-78	EC1	Angiogenic
TMED9	1.74345e-82	0.275099	0.686	0.47	6.38118e-78	EC4	Mesenchymal
HTRA1	1.89419e-82	0.262106	0.545	0.303	6.93294e-78	EC4	Mesenchymal
MSC-AS1	2.72683e-82	0.362507	0.409	0.217	9.98047e-78	EC5	Procoagulatory
GPR176	2.90058e-82	0.300689	0.681	0.446	1.06164e-77	EC4	Mesenchymal
NUDT4	3.50018e-82	-0.286647	0.549	0.637	1.2811e-77	EC2	Proliferative
CACNG8	6.69927e-82	-0.274696	0.139	0.382	2.452e-77	EC5	Procoagulatory
SHE	7.13951e-82	-0.287552	0.037	0.245	2.61313e-77	EC4	Mesenchymal
APC	7.17535e-82	-0.317681	0.539	0.689	2.62625e-77	EC4	Mesenchymal
OSMR	7.43468e-82	-0.276993	0.283	0.518	2.72117e-77	EC1	Angiogenic
STK39	8.43146e-82	-0.268456	0.23	0.462	3.086e-77	EC1	Angiogenic
ANTXR1	9.95975e-82	0.31451	0.545	0.335	3.64537e-77	EC5	Procoagulatory
BCR	1.26153e-81	-0.324041	0.297	0.518	4.61734e-77	EC4	Mesenchymal
SLC35F2	1.28638e-81	-0.308947	0.109	0.338	4.70827e-77	EC4	Mesenchymal
SAT1	1.39174e-81	-0.364363	0.662	0.752	5.09392e-77	EC4	Mesenchymal
NPAS2	1.54069e-81	-0.321983	0.586	0.721	5.63908e-77	EC4	Mesenchymal
CAPRIN2	1.7128e-81	-0.259304	0.261	0.5	6.26902e-77	EC1	Angiogenic
UACA	2.61281e-81	0.291848	0.884	0.775	9.56316e-77	EC4	Mesenchymal
TGFB2	2.83224e-81	-0.354627	0.239	0.404	1.03663e-76	EC2	Proliferative
HS6ST3	6.00653e-81	-0.360574	0.036	0.24	2.19845e-76	EC4	Mesenchymal
L3MBTL3	6.20024e-81	-0.346772	0.25	0.466	2.26935e-76	EC4	Mesenchymal
RASSF3	6.59399e-81	-0.319868	0.359	0.595	2.41347e-76	EC5	Procoagulatory
ARHGAP24	1.06649e-80	-0.264201	0.714	0.852	3.90347e-76	EC1	Angiogenic
ATP11A	1.10228e-80	-0.311997	0.369	0.577	4.03446e-76	EC4	Mesenchymal
STK38L	1.28661e-80	-0.311321	0.36	0.493	4.70913e-76	EC2	Proliferative
PRAG1	1.55313e-80	0.30436	0.423	0.262	5.68461e-76	EC1	Angiogenic
FAM49A	2.19879e-80	-0.27448	0.027	0.228	8.04779e-76	EC4	Mesenchymal
CYTH1	2.961e-80	-0.323457	0.284	0.498	1.08376e-75	EC4	Mesenchymal
PLXND1	3.62477e-80	0.268357	0.607	0.5	1.3267e-75	EC1	Angiogenic
TSPAN18	4.18868e-80	-0.34046	0.025	0.224	1.5331e-75	EC4	Mesenchymal
MMP2	4.50646e-80	-0.344579	0.355	0.553	1.64941e-75	EC4	Mesenchymal
KALRN	4.57901e-80	-0.348123	0.056	0.265	1.67597e-75	EC4	Mesenchymal
YARS	5.0742e-80	0.264349	0.597	0.365	1.85721e-75	EC4	Mesenchymal
CDC14A	5.55877e-80	-0.362691	0.182	0.399	2.03456e-75	EC4	Mesenchymal
GMDS-DT	8.75631e-80	-0.337476	0.326	0.541	3.2049e-75	EC4	Mesenchymal
CCBE1	9.07508e-80	0.418879	0.511	0.329	3.32157e-75	EC5	Procoagulatory
TCIM	1.07927e-79	-0.312288	0.115	0.342	3.95022e-75	EC5	Procoagulatory
CFH	1.31552e-79	-0.380638	0.273	0.486	4.81492e-75	EC4	Mesenchymal
MAGI1	1.43903e-79	0.254337	0.767	0.733	5.267e-75	EC1	Angiogenic
GRIK2	2.41609e-79	-0.29149	0.009	0.123	8.84312e-75	EC2	Proliferative
MYCT1	3.1924e-79	-0.318766	0.311	0.531	1.16845e-74	EC4	Mesenchymal
SHROOM2	3.88543e-79	-0.279864	0.044	0.251	1.42211e-74	EC4	Mesenchymal
CD55	3.96734e-79	-0.379447	0.277	0.482	1.45209e-74	EC4	Mesenchymal
ADAMTS9	4.41812e-79	-0.461225	0.187	0.417	1.61708e-74	EC5	Procoagulatory
AL353138.1	5.79484e-79	-0.350868	0.256	0.504	2.12097e-74	EC5	Procoagulatory
PLPP3	8.83941e-79	-0.386555	0.224	0.443	3.23531e-74	EC4	Mesenchymal
DENND4A	1.00302e-78	-0.287507	0.552	0.694	3.67114e-74	EC4	Mesenchymal
ERRFI1	1.24407e-78	-0.256453	0.071	0.251	4.55344e-74	EC1	Angiogenic
CMSS1	1.42401e-78	-0.325326	0.348	0.588	5.212e-74	EC5	Procoagulatory
LINC01829	1.45747e-78	-0.268597	0.183	0.395	5.3345e-74	EC1	Angiogenic
ANPEP	1.57164e-78	-0.309442	0.13	0.357	5.75235e-74	EC4	Mesenchymal
MYO5A	2.72976e-78	-0.272114	0.599	0.712	9.9912e-74	EC4	Mesenchymal
STRBP	2.81508e-78	-0.301017	0.078	0.291	1.03035e-73	EC4	Mesenchymal
DDX58	3.44837e-78	-0.353648	0.261	0.476	1.26214e-73	EC4	Mesenchymal
PDLIM3	5.53492e-78	0.293136	0.51	0.285	2.02584e-73	EC4	Mesenchymal
PKM	7.03267e-78	-0.251564	0.561	0.772	2.57403e-73	EC1	Angiogenic
RNF121	7.33837e-78	-0.306938	0.339	0.568	2.68592e-73	EC5	Procoagulatory
ARF4	9.35375e-78	0.252886	0.771	0.573	3.42357e-73	EC4	Mesenchymal
PPP1R13B	9.37415e-78	-0.309373	0.17	0.395	3.43103e-73	EC4	Mesenchymal
CD93	9.58289e-78	-0.296436	0.113	0.334	3.50743e-73	EC5	Procoagulatory
ALDH1A3	1.06077e-77	-0.329897	0.235	0.44	3.88252e-73	EC1	Angiogenic
SYT14	1.30792e-77	-0.250775	0.01	0.188	4.78712e-73	EC5	Procoagulatory
IGF2BP3	1.32978e-77	-0.292691	0.588	0.778	4.86711e-73	EC5	Procoagulatory
AC119673.2	1.3532e-77	-0.261077	0.007	0.183	4.95284e-73	EC5	Procoagulatory
FBXO32	1.4554e-77	-0.296036	0.097	0.241	5.32691e-73	EC2	Proliferative
SERPINE2	3.02248e-77	0.36898	0.687	0.596	1.10626e-72	EC5	Procoagulatory
GFOD1	3.44851e-77	-0.346219	0.143	0.359	1.26219e-72	EC4	Mesenchymal
PPP1R16B	3.5088e-77	-0.36402	0.125	0.348	1.28426e-72	EC5	Procoagulatory
ERGIC1	3.69789e-77	0.265832	0.605	0.381	1.35347e-72	EC4	Mesenchymal
SERPINE2	3.79833e-77	0.314801	0.781	0.585	1.39023e-72	EC4	Mesenchymal
RASA2	4.90098e-77	-0.290133	0.599	0.787	1.79381e-72	EC5	Procoagulatory
AF117829.1	6.21357e-77	-0.274041	0.509	0.618	2.27423e-72	EC2	Proliferative
PURA	6.24618e-77	0.251451	0.56	0.336	2.28616e-72	EC4	Mesenchymal
ARAP3	9.05446e-77	-0.288897	0.14	0.363	3.31402e-72	EC4	Mesenchymal
NCOR2	1.05051e-76	0.259221	0.757	0.557	3.84499e-72	EC4	Mesenchymal
AC083837.1	1.17928e-76	-0.44402	0.164	0.39	4.31628e-72	EC4	Mesenchymal
PDIA5	1.28574e-76	0.27359	0.62	0.403	4.70594e-72	EC4	Mesenchymal
ITGA11	1.64218e-76	-0.270913	0.023	0.143	6.01054e-72	EC2	Proliferative
SLC25A29	2.09266e-76	-0.261777	0.064	0.271	7.65934e-72	EC4	Mesenchymal
BNC2	2.16702e-76	-0.274456	0.691	0.796	7.93151e-72	EC4	Mesenchymal
ARFGEF3	2.21525e-76	-0.250803	0.037	0.235	8.10805e-72	EC4	Mesenchymal
DISC1	2.59643e-76	-0.338809	0.274	0.486	9.50319e-72	EC4	Mesenchymal
LINC00882	3.20066e-76	-0.350423	0.1	0.247	1.17147e-71	EC2	Proliferative
ATF4	3.89874e-76	0.252354	0.582	0.363	1.42698e-71	EC4	Mesenchymal
C1R	4.50047e-76	0.264435	0.265	0.117	1.64722e-71	EC5	Procoagulatory
TGFBI	6.92583e-76	-0.362345	0.416	0.529	2.53492e-71	EC2	Proliferative
SVIL	7.49257e-76	-0.256182	0.72	0.879	2.74236e-71	EC5	Procoagulatory
TPM2	9.93797e-76	-0.278579	0.431	0.554	3.6374e-71	EC2	Proliferative
EPB41L3	1.11439e-75	-0.301796	0.223	0.426	4.07879e-71	EC1	Angiogenic
DIP2B	1.40033e-75	-0.279065	0.513	0.668	5.12534e-71	EC4	Mesenchymal
MANCR	1.65938e-75	-0.305101	0.058	0.258	6.07348e-71	EC4	Mesenchymal
PFKP	2.08754e-75	-0.251767	0.356	0.602	7.64059e-71	EC1	Angiogenic
AC079148.3	4.73573e-75	-0.304587	0.033	0.226	1.73333e-70	EC4	Mesenchymal
MEG8	5.6274e-75	-0.263444	0.198	0.324	2.05969e-70	EC3	Activated mesenchymal-like
EMP1	6.35685e-75	-0.306971	0.332	0.562	2.32667e-70	EC5	Procoagulatory
TTC7B	7.34844e-75	-0.297769	0.327	0.526	2.6896e-70	EC4	Mesenchymal
SH2D3C	1.15482e-74	-0.256578	0.019	0.204	4.22677e-70	EC4	Mesenchymal
CTSC	1.20489e-74	0.367392	0.562	0.393	4.41004e-70	EC4	Mesenchymal
AP002989.1	1.65852e-74	-0.350586	0.127	0.313	6.07035e-70	EC1	Angiogenic
TBC1D8	2.23798e-74	-0.321962	0.179	0.398	8.19125e-70	EC4	Mesenchymal
NT5E	2.29801e-74	0.259789	0.537	0.324	8.41094e-70	EC4	Mesenchymal
DIAPH3	2.47482e-74	0.332363	0.607	0.377	9.05809e-70	EC4	Mesenchymal
DOCK6	2.80498e-74	0.273077	0.543	0.422	1.02665e-69	EC1	Angiogenic
CNTNAP3	2.9449e-74	0.306546	0.462	0.313	1.07786e-69	EC1	Angiogenic
ADD3	3.44258e-74	-0.266708	0.514	0.618	1.26002e-69	EC2	Proliferative
CCDC80	4.7984e-74	-0.300803	0.167	0.314	1.75626e-69	EC2	Proliferative
IPO5	4.81388e-74	0.25797	0.593	0.377	1.76193e-69	EC4	Mesenchymal
USP31	5.4849e-74	-0.290845	0.186	0.415	2.00753e-69	EC5	Procoagulatory
BACE2	5.9952e-74	0.267441	0.659	0.585	2.1943e-69	EC1	Angiogenic
CHRM3	6.25703e-74	-0.35006	0.012	0.184	2.29014e-69	EC5	Procoagulatory
TNFAIP8	6.78026e-74	-0.263734	0.179	0.39	2.48164e-69	EC1	Angiogenic
RUNX1T1	6.94587e-74	-0.304653	0.354	0.59	2.54226e-69	EC1	Angiogenic
TIMP1	7.87222e-74	-0.254964	0.492	0.575	2.88131e-69	EC3	Activated mesenchymal-like
PKD1L1	8.25544e-74	-0.297337	0.022	0.199	3.02157e-69	EC5	Procoagulatory
LRRC8B	9.12744e-74	-0.251722	0.062	0.26	3.34074e-69	EC5	Procoagulatory
PHIP	9.28311e-74	-0.290855	0.521	0.668	3.39771e-69	EC4	Mesenchymal
PRXL2A	1.07898e-73	-0.308531	0.083	0.286	3.94919e-69	EC4	Mesenchymal
RNF24	1.2723e-73	0.316439	0.493	0.334	4.65674e-69	EC5	Procoagulatory
PKD2	1.44318e-73	0.266388	0.733	0.543	5.28218e-69	EC4	Mesenchymal
SCN8A	1.87077e-73	-0.281797	0.148	0.379	6.84721e-69	EC5	Procoagulatory
ZNF117	2.38269e-73	-0.375982	0.23	0.431	8.72089e-69	EC4	Mesenchymal
CGNL1	2.93393e-73	0.28992	0.609	0.475	1.07385e-68	EC1	Angiogenic
MTCL1	3.17996e-73	-0.251777	0.218	0.441	1.1639e-68	EC1	Angiogenic
SPATS2L	4.1694e-73	-0.257342	0.368	0.605	1.52604e-68	EC1	Angiogenic
FOXO1	7.2407e-73	-0.271345	0.699	0.855	2.65017e-68	EC5	Procoagulatory
ITGA1	8.15602e-73	-0.282615	0.118	0.259	2.98518e-68	EC2	Proliferative
EMCN	9.43686e-73	0.402609	0.614	0.456	3.45399e-68	EC5	Procoagulatory
ZDHHC21	9.70361e-73	-0.284817	0.531	0.736	3.55162e-68	EC5	Procoagulatory
NHS	9.87514e-73	-0.259006	0.092	0.232	3.6144e-68	EC2	Proliferative
MYL9	2.0727e-72	-0.269508	0.22	0.371	7.5863e-68	EC2	Proliferative
RAPGEF1	2.09578e-72	-0.299238	0.391	0.571	7.67076e-68	EC4	Mesenchymal
GFPT1	2.4949e-72	0.256572	0.747	0.54	9.1316e-68	EC4	Mesenchymal
TMCC3	2.70088e-72	-0.269827	0.06	0.254	9.88547e-68	EC5	Procoagulatory
TSPAN18	2.75065e-72	-0.305749	0.04	0.224	1.00676e-67	EC5	Procoagulatory
AMPH	2.85161e-72	-0.281151	0.047	0.203	1.04372e-67	EC1	Angiogenic
MIR222HG	3.323e-72	-0.321962	0.318	0.55	1.21625e-67	EC5	Procoagulatory
LYPLAL1-DT	3.47318e-72	-0.282549	0.012	0.149	1.27122e-67	EC1	Angiogenic
MYCT1	3.94408e-72	-0.28604	0.301	0.534	1.44357e-67	EC5	Procoagulatory
EFNB2	4.79863e-72	-0.36054	0.203	0.408	1.75635e-67	EC4	Mesenchymal
SLC10A7	6.55814e-72	-0.262824	0.378	0.603	2.40035e-67	EC1	Angiogenic
ALDH1A3	7.15346e-72	-0.352528	0.217	0.435	2.61824e-67	EC5	Procoagulatory
FLRT2	7.77605e-72	0.284004	0.843	0.743	2.84611e-67	EC5	Procoagulatory
PKP4	1.16125e-71	-0.297833	0.487	0.707	4.25028e-67	EC5	Procoagulatory
PDGFB	1.69972e-71	-0.258087	0.079	0.285	6.22115e-67	EC5	Procoagulatory
ADAMTS18	1.87554e-71	-0.26164	0.1	0.202	6.86466e-67	EC3	Activated mesenchymal-like
RNF19A	1.90975e-71	0.316741	0.581	0.525	6.98988e-67	EC1	Angiogenic
DPYSL3	2.26466e-71	-0.29226	0.66	0.76	8.28886e-67	EC4	Mesenchymal
SULF1	3.03821e-71	0.26757	0.695	0.637	1.11201e-66	EC3	Activated mesenchymal-like
NEK10	3.71315e-71	0.363132	0.527	0.411	1.35905e-66	EC1	Angiogenic
CEBPD	4.09116e-71	0.301235	0.347	0.191	1.4974e-66	EC5	Procoagulatory
WLS	4.26593e-71	-0.30637	0.314	0.512	1.56137e-66	EC4	Mesenchymal
NPPB	5.40211e-71	0.26407	0.197	0.071	1.97723e-66	EC4	Mesenchymal
IGFBP3	5.61325e-71	-0.322829	0.318	0.412	2.05451e-66	EC3	Activated mesenchymal-like
NDRG4	5.69552e-71	-0.26736	0.032	0.216	2.08462e-66	EC4	Mesenchymal
LRRC8B	9.59172e-71	-0.268644	0.064	0.258	3.51067e-66	EC4	Mesenchymal
COL8A1	1.00237e-70	-0.365785	0.575	0.725	3.66878e-66	EC1	Angiogenic
NID1	1.12253e-70	0.278327	0.363	0.226	4.10856e-66	EC1	Angiogenic
ASPM	1.12296e-70	-0.297308	0.051	0.206	4.11014e-66	EC1	Angiogenic
ABCC1	1.26467e-70	-0.254057	0.586	0.713	4.62882e-66	EC4	Mesenchymal
NRP2	1.50241e-70	-0.401053	0.149	0.351	5.49896e-66	EC5	Procoagulatory
ZNF462	1.85831e-70	-0.313447	0.199	0.4	6.8016e-66	EC4	Mesenchymal
MAST4	2.56183e-70	-0.252066	0.745	0.839	9.37655e-66	EC5	Procoagulatory
FRMD4B	2.82434e-70	-0.258058	0.668	0.797	1.03374e-65	EC5	Procoagulatory
PTGIS	2.99906e-70	-0.309543	0.278	0.489	1.09769e-65	EC1	Angiogenic
CREB5	3.29218e-70	-0.27297	0.097	0.302	1.20497e-65	EC5	Procoagulatory
ZDHHC14	4.37489e-70	0.260951	0.627	0.517	1.60125e-65	EC1	Angiogenic
HLA-E	4.64705e-70	-0.277453	0.463	0.621	1.70087e-65	EC4	Mesenchymal
STOM	5.09916e-70	-0.299809	0.371	0.555	1.86634e-65	EC4	Mesenchymal
BMP2	5.22128e-70	-0.280899	0.125	0.331	1.91104e-65	EC5	Procoagulatory
SNTB2	5.31391e-70	-0.303312	0.424	0.583	1.94494e-65	EC4	Mesenchymal
MGST2	5.61733e-70	-0.281204	0.093	0.293	2.056e-65	EC4	Mesenchymal
IGFBP5	9.71059e-70	-0.342015	0.114	0.252	3.55417e-65	EC2	Proliferative
RFTN1	9.89942e-70	-0.255184	0.286	0.502	3.62329e-65	EC1	Angiogenic
GRB14	1.35333e-69	-0.273824	0.103	0.275	4.95333e-65	EC1	Angiogenic
SNED1	1.56871e-69	-0.335557	0.18	0.384	5.74163e-65	EC4	Mesenchymal
ST8SIA6	1.81695e-69	-0.309306	0.016	0.182	6.65022e-65	EC5	Procoagulatory
GASK1B	2.02996e-69	-0.336262	0.145	0.343	7.42984e-65	EC4	Mesenchymal
ACVR1B	2.11454e-69	-0.298811	0.225	0.432	7.73943e-65	EC4	Mesenchymal
FABP5	2.23745e-69	0.279773	0.335	0.198	8.18929e-65	EC1	Angiogenic
POSTN	2.58839e-69	-0.438549	0.321	0.516	9.47378e-65	EC5	Procoagulatory
TGFBR3	2.81563e-69	0.275568	0.276	0.145	1.03055e-64	EC1	Angiogenic
RASSF8	3.88471e-69	-0.276553	0.558	0.749	1.42184e-64	EC5	Procoagulatory
RNF149	4.16322e-69	-0.298335	0.429	0.591	1.52378e-64	EC4	Mesenchymal
ABCG1	4.27948e-69	-0.266654	0.027	0.206	1.56633e-64	EC4	Mesenchymal
CMIP	4.4628e-69	-0.254707	0.689	0.788	1.63343e-64	EC4	Mesenchymal
SLCO3A1	4.61318e-69	0.338132	0.551	0.402	1.68847e-64	EC5	Procoagulatory
TCIM	5.78536e-69	-0.320894	0.136	0.337	2.1175e-64	EC4	Mesenchymal
PALLD	6.14021e-69	-0.30203	0.308	0.457	2.24738e-64	EC2	Proliferative
MAGI2	7.54372e-69	-0.287799	0.639	0.752	2.76108e-64	EC4	Mesenchymal
SLC25A37	8.39386e-69	-0.255541	0.552	0.777	3.07224e-64	EC1	Angiogenic
ACER3	9.27849e-69	-0.30705	0.4	0.565	3.39602e-64	EC4	Mesenchymal
SLC16A7	1.03046e-68	-0.2532	0.115	0.325	3.77159e-64	EC5	Procoagulatory
TTLL5	1.16542e-68	-0.295366	0.398	0.569	4.26554e-64	EC4	Mesenchymal
LRRC8C	1.33256e-68	-0.306543	0.287	0.488	4.8773e-64	EC4	Mesenchymal
P4HA1	2.10552e-68	-0.253813	0.377	0.607	7.7064e-64	EC1	Angiogenic
SGIP1	2.26369e-68	-0.320711	0.147	0.286	8.28534e-64	EC2	Proliferative
TUBB6	2.52231e-68	-0.270302	0.488	0.71	9.23191e-64	EC5	Procoagulatory
SLC16A1	3.34506e-68	-0.28013	0.28	0.508	1.22433e-63	EC5	Procoagulatory
USP25	4.02628e-68	-0.261756	0.577	0.771	1.47366e-63	EC5	Procoagulatory
SGIP1	5.67038e-68	0.297908	0.394	0.235	2.07542e-63	EC1	Angiogenic
NAALADL2	7.00694e-68	-0.258701	0.483	0.692	2.56461e-63	EC1	Angiogenic
SRPX2	7.7819e-68	-0.287486	0.335	0.555	2.84825e-63	EC5	Procoagulatory
ST8SIA6	8.60248e-68	-0.322365	0.012	0.18	3.14859e-63	EC4	Mesenchymal
UHRF2	1.09959e-67	-0.264164	0.564	0.692	4.02459e-63	EC4	Mesenchymal
COLEC12	1.11559e-67	0.292438	0.568	0.419	4.08317e-63	EC1	Angiogenic
BST2	1.22243e-67	-0.305895	0.199	0.402	4.4742e-63	EC4	Mesenchymal
FNBP1L	1.6069e-67	-0.299459	0.337	0.57	5.8814e-63	EC5	Procoagulatory
HECW2	1.73208e-67	0.288503	0.811	0.635	6.3396e-63	EC4	Mesenchymal
EVA1C	1.87946e-67	-0.30983	0.3	0.513	6.87902e-63	EC5	Procoagulatory
FBXO32	2.7425e-67	-0.277998	0.075	0.236	1.00378e-62	EC1	Angiogenic
NOTCH1	4.41355e-67	-0.270146	0.118	0.317	1.6154e-62	EC4	Mesenchymal
MTSS1	4.83376e-67	0.259553	0.625	0.498	1.76921e-62	EC1	Angiogenic
COL27A1	5.38142e-67	-0.27164	0.169	0.384	1.96965e-62	EC5	Procoagulatory
GPC6	5.41412e-67	-0.255336	0.01	0.109	1.98162e-62	EC2	Proliferative
PLSCR4	6.62146e-67	0.271685	0.792	0.659	2.42352e-62	EC5	Procoagulatory
NRG1	8.06628e-67	0.328253	0.818	0.635	2.95234e-62	EC5	Procoagulatory
ITPKB	1.28026e-66	-0.287465	0.075	0.264	4.68587e-62	EC4	Mesenchymal
TRPS1	1.86152e-66	-0.288864	0.318	0.523	6.81336e-62	EC1	Angiogenic
EPS8	2.04243e-66	-0.264571	0.241	0.45	7.47549e-62	EC1	Angiogenic
IFI27	2.47098e-66	-0.266788	0.616	0.754	9.04404e-62	EC4	Mesenchymal
NR2F2	2.61114e-66	-0.306919	0.393	0.569	9.55703e-62	EC4	Mesenchymal
SPOCD1	2.87746e-66	-0.272914	0.189	0.399	1.05318e-61	EC5	Procoagulatory
NCOA3	4.05187e-66	-0.253763	0.583	0.711	1.48303e-61	EC4	Mesenchymal
EPHB4	6.86112e-66	-0.27282	0.123	0.32	2.51124e-61	EC4	Mesenchymal
CSGALNACT1	6.95421e-66	-0.436197	0.132	0.323	2.54531e-61	EC4	Mesenchymal
PREX1	8.0154e-66	0.276476	0.494	0.378	2.93372e-61	EC1	Angiogenic
ACSM3	1.10057e-65	-0.516082	0.032	0.205	4.0282e-61	EC4	Mesenchymal
OSBPL3	1.14591e-65	-0.303135	0.397	0.611	4.19414e-61	EC5	Procoagulatory
TIMP1	1.195e-65	-0.291564	0.365	0.569	4.37382e-61	EC1	Angiogenic
RUNX1	1.20454e-65	0.263167	0.74	0.518	4.40873e-61	EC4	Mesenchymal
CROT	1.23817e-65	0.347896	0.288	0.163	4.53181e-61	EC1	Angiogenic
DNAJC18	1.30401e-65	-0.25981	0.093	0.285	4.77282e-61	EC4	Mesenchymal
FYN	2.32505e-65	0.262026	0.81	0.663	8.50991e-61	EC4	Mesenchymal
USP53	3.34023e-65	-0.260471	0.417	0.632	1.22256e-60	EC1	Angiogenic
ABCA6	3.5717e-65	-0.360513	0.205	0.405	1.30728e-60	EC4	Mesenchymal
CARD11	4.8396e-65	-0.269285	0.124	0.324	1.77134e-60	EC5	Procoagulatory
FAM43A	5.57936e-65	-0.29369	0.238	0.438	2.0421e-60	EC4	Mesenchymal
RASGRF2	5.98249e-65	-0.272735	0.357	0.56	2.18965e-60	EC1	Angiogenic
PLCL1	6.2722e-65	-0.314262	0.606	0.709	2.29569e-60	EC1	Angiogenic
WWOX	6.45941e-65	-0.338665	0.277	0.469	2.36421e-60	EC4	Mesenchymal
IFI44	6.8591e-65	-0.282836	0.077	0.265	2.5105e-60	EC4	Mesenchymal
FAM241A	8.5594e-65	-0.310267	0.21	0.404	3.13283e-60	EC4	Mesenchymal
HEG1	1.48907e-64	-0.25635	0.614	0.667	5.45016e-60	EC2	Proliferative
NEDD4	1.90069e-64	-0.25305	0.574	0.694	6.95672e-60	EC4	Mesenchymal
RFTN1	1.98699e-64	0.252758	0.653	0.448	7.27258e-60	EC4	Mesenchymal
AC005699.1	2.1819e-64	-0.258083	0.015	0.178	7.98597e-60	EC4	Mesenchymal
TGFBI	3.20508e-64	-0.33187	0.341	0.535	1.17309e-59	EC1	Angiogenic
CTDSPL	4.32026e-64	-0.269824	0.205	0.423	1.58126e-59	EC5	Procoagulatory
FRMD6	4.53435e-64	0.250811	0.867	0.719	1.65962e-59	EC4	Mesenchymal
SLC25A37	4.87525e-64	-0.252602	0.667	0.753	1.78439e-59	EC4	Mesenchymal
SH3BP5	5.97209e-64	0.262909	0.442	0.312	2.18584e-59	EC1	Angiogenic
[truncated: 228 more rows]

## Sheet: Supplementary File 1e
Cluster	Pathways
EC1	WP4331: Neovascularization process (p-value 4.0x10-9); GO:0038084: vacular endothelial growth factor signaling pathway (p-value 1.5x10-9)
EC2	GO:1903047: mitotic cell cycle process (p-value 7.4x10-35)
EC3	GO:0048660: regulation of smooth muscle cell proliferation (p-value 1.1x10-10); NABA CORE MATRISOME (M5884; p-value 1x10-34); locomotion (GO:0040011; p-value 1.2x10-15),
EC4	GO:0097435: supramolecular fiber organization (p-value 3.2x10-19)
EC5	GO:0090330: regulation of platelet aggregation (p-value 1.3x10-6)

## Sheet: Supplementary File 1f
Lane	Cells	Peaks detected per nucleus
1	3025	3480
2	3425	7573
3	1192	4608
4	2727	4700
5	2902	7334
6	1074	19259
7	2212	12041

## Sheet: Supplementary File 1g
Donor	Sex	Ancestry	Chemical Perturbation	Genetic Perturbation
1	Female	Admixed Americans	TGFB2	NA
2	Male	Admixed Americans	TGFB2, IL1B	NA
3	Female	European	NA	siERG
4	Male	Admixed Americans	TGFB2, IL1B	NA
5	Male	Admixed Americans	TGFB2, IL1B	siERG
6	Male	Admixed Americans	TGFB2, IL1B	siERG
7	Female	East Asian	IL1B6h	NA
8	Male	European	IL1B6h	NA

## Sheet: Supplementary File 1h
Cluster	Peaks (N)
EC1	576
EC2	4284
EC3	79
EC4	8091
EC5	701
Total	13731

## Sheet: Supplementary File 1i
	TGFB2 n (%)		IL1B n (%)		siERG n (%)		Total
Cluster	Up	Down	Up	Down	Up	Down	Up	Down
EC	205 (16%)	139 (13%)	455 (36%)	300 (29%)	595 (47%)	592 (57%)	1255	1031
EC1	0 (0%)	0 (0%)	1 (1%)	0 (0%)	147 (99%)	127 (100%)	148	127
EC2	0 (0%)	0 (0%)	32 (14%)	10 (9%)	202 (86%)	106 (91%)	234	116
EC3	134 (15%)	95 (15%)	431 (47%)	289 (46%)	360 (39%)	238 (38%)	925	622
EC4	135 (77%)	100 (85%)	27 (15%)	15 (13%)	14 (8%)	3 (3%)	176	118
							Total: 4,752

## Sheet: Supplementary File 1j
Cluster	TGFB2 n (%)	IL1B n (%)	siERG n (%)	Total
EC1	133 (29%)	27 (6%)	305 (66%)	465
EC2	127 (25%)	35 (7%)	340 (68%)	502
EC3	190 (15%)	804 (61%)	315 (24%)	1309
EC4	632 (36%)	931 (53%)	195 (11%)	1758
Total				4034

[truncated: 8 more sheets: Supplementary File 1k, Supplementary File 1l, Supplementary File 1m, Supplementary File 1n, Supplementary File 1o, Supplementary File 1p, Supplementary File 1q, Supplementary File 1r]
